# Supplementary material for: Prevention, screening, assessing and managing of non-adherent behaviour in people with rheumatic and musculoskeletal diseases: systematic reviews informing the 2020 EULAR points to consider
Source: PubMed Central journal article supplement — RMD Open. 2020 Nov 9;6(3):e001432. doi: 10.1136/rmdopen-2020-001432 (PMC7856118; doi:10.1136/rmdopen-2020-001432), 2020-11-09
Supplement: rmdopen-2020-001432supp001.pdf [file rmdopen-2020-001432supp001.pdf]

**Supplement A – Search Protocol (Guidelines or Systematic Reviews) EULAR Project.  
 Screening, assessing, and managing of non-adherent behaviour in people with RMDs: a  
 systematic literature review informing the 2020 EULAR points to consider**

|                                      |    |
|--------------------------------------|----|
| Adherence to medications.....        | 2  |
| PubMed .....                         | 2  |
| Embase .....                         | 3  |
| CINAHL .....                         | 3  |
| Cochrane Library.....                | 4  |
| Adherence to diets .....             | 5  |
| PubMed .....                         | 5  |
| Embase .....                         | 6  |
| Cinahl .....                         | 6  |
| Cochrane Library.....                | 7  |
| Adherence to exercise .....          | 8  |
| PubMed .....                         | 8  |
| Embase .....                         | 9  |
| Cochrane.....                        | 9  |
| Adherence to clinical visits .....   | 11 |
| PubMed .....                         | 11 |
| Embase .....                         | 12 |
| CINAHL .....                         | 12 |
| Cochrane.....                        | 14 |
| Assessment Tools.....                | 15 |
| Tools for medication adherence.....  | 15 |
| PubMed .....                         | 15 |
| Embase .....                         | 15 |
| CINAHL .....                         | 17 |
| Cochrane Library.....                | 18 |
| Tools for adherence to exercise..... | 19 |
| Pubmed .....                         | 19 |
| Embase .....                         | 21 |
| Cinahl .....                         | 22 |
| Cochrane Library.....                | 23 |

## Adherence to medications

| Database                                                  | Provider   | Hits | Date for search |
|-----------------------------------------------------------|------------|------|-----------------|
| PubMed                                                    |            | 836  | 2018.06.12      |
| Embase                                                    | Embase.com | 1559 | 2018.06.12      |
| CINAHL                                                    | Ebsco Host | 210  | 2018.06.12      |
| Cochrane                                                  | Wiley      | 995  | 2018.06.12      |
| Total                                                     |            | 3600 | 2018.06.12      |
| Total after duplicate search in Endnote                   |            | 2844 |                 |
| Total added to screen after duplicate search in Covidence |            | 2822 | 2018.06.09      |

## PubMed

| Search | Query                                                                                                                                                                                                                                                                                                                                                                                                                                                                                                                                                                                                                                                                                                                                                                                                                                                                                                                                                                                                                                                                                                                                                                                                                             | Items found |
|--------|-----------------------------------------------------------------------------------------------------------------------------------------------------------------------------------------------------------------------------------------------------------------------------------------------------------------------------------------------------------------------------------------------------------------------------------------------------------------------------------------------------------------------------------------------------------------------------------------------------------------------------------------------------------------------------------------------------------------------------------------------------------------------------------------------------------------------------------------------------------------------------------------------------------------------------------------------------------------------------------------------------------------------------------------------------------------------------------------------------------------------------------------------------------------------------------------------------------------------------------|-------------|
| #16    | Search "Rheumatic Diseases"[Mesh] OR "Rheumatology"[Mesh] OR Rheumat*[Title/Abstract] OR arthrit*[Title/Abstract] OR osteoarthritis*[Title/Abstract]                                                                                                                                                                                                                                                                                                                                                                                                                                                                                                                                                                                                                                                                                                                                                                                                                                                                                                                                                                                                                                                                              | 333258      |
| #17    | Search ((barrier*[Title/Abstract] OR attend*[Title/Abstract] OR adher*[Title/Abstract] OR participat*[Title/Abstract] OR attitude*[Title/Abstract] OR belief*[Title/Abstract] OR complian*[Title/Abstract] OR noncomplian*[Title/Abstract] OR nonadher*[Title/Abstract] OR persist*[Title/Abstract] OR refus*[Title/Abstract] OR interrupt*[Title/Abstract] OR dropout*[Title/Abstract] OR drop out*[Title/Abstract] OR "no show"[Title/Abstract])) OR ("Treatment Adherence and Compliance"[Mesh])                                                                                                                                                                                                                                                                                                                                                                                                                                                                                                                                                                                                                                                                                                                               | 1819940     |
| #18    | Search (((("Drug Therapy"[Mesh] OR "drug therapy"[Subheading])) OR "Antirheumatic Agents"[Mesh]) OR (Antirheumatic[tiab] OR Anti Rheumatic[tiab])) OR NSAID*[Title/Abstract] OR "Drug Prescriptions"[Mesh] OR ((medication*[Text Word] OR prescrib*[Text Word] OR prescription*[Text Word]))                                                                                                                                                                                                                                                                                                                                                                                                                                                                                                                                                                                                                                                                                                                                                                                                                                                                                                                                      | 2992504     |
| #19    | Search (((("Rheumatic Diseases"[Mesh] OR "Rheumatology"[Mesh] OR Rheumat*[Title/Abstract] OR arthrit*[Title/Abstract] OR osteoarthritis*[Title/Abstract])) AND (((barrier*[Title/Abstract] OR attend*[Title/Abstract] OR adher*[Title/Abstract] OR participat*[Title/Abstract] OR attitude*[Title/Abstract] OR belief*[Title/Abstract] OR complian*[Title/Abstract] OR noncomplian*[Title/Abstract] OR nonadher*[Title/Abstract] OR persist*[Title/Abstract] OR refus*[Title/Abstract] OR interrupt*[Title/Abstract] OR dropout*[Title/Abstract] OR drop out*[Title/Abstract] OR "no show"[Title/Abstract])) OR ("Treatment Adherence and Compliance"[Mesh]))) AND (((("Drug Therapy"[Mesh] OR "drug therapy"[Subheading])) OR "Antirheumatic Agents"[Mesh]) OR (Antirheumatic[tiab] OR Anti Rheumatic[tiab])) OR NSAID*[Title/Abstract] OR "Drug Prescriptions"[Mesh] OR ((medication*[Text Word] OR prescrib*[Text Word] OR prescription*[Text Word]))                                                                                                                                                                                                                                                                          | 7637        |
| #20    | Search (("Guideline"[Publication Type] OR "Guidelines as Topic"[Mesh])) OR ((Guideline*[Text Word] OR practice guideline*[Text Word] OR clinical guideline*[Text Word] OR guidance[Text Word] OR consensus[Text Word] OR recommendation*[Text Word]))                                                                                                                                                                                                                                                                                                                                                                                                                                                                                                                                                                                                                                                                                                                                                                                                                                                                                                                                                                             | 751554      |
| #21    | Search systematic[sb]                                                                                                                                                                                                                                                                                                                                                                                                                                                                                                                                                                                                                                                                                                                                                                                                                                                                                                                                                                                                                                                                                                                                                                                                             | 365924      |
| #22    | Search (((("Guideline"[Publication Type] OR "Guidelines as Topic"[Mesh])) OR ((Guideline*[Text Word] OR practice guideline*[Text Word] OR clinical guideline*[Text Word] OR guidance[Text Word] OR consensus[Text Word] OR recommendation*[Text Word]))) OR systematic[sb]                                                                                                                                                                                                                                                                                                                                                                                                                                                                                                                                                                                                                                                                                                                                                                                                                                                                                                                                                        | 1022777     |
| #23    | Search (((("Rheumatic Diseases"[Mesh] OR "Rheumatology"[Mesh] OR Rheumat*[Title/Abstract] OR arthrit*[Title/Abstract] OR osteoarthritis*[Title/Abstract])) AND (((barrier*[Title/Abstract] OR attend*[Title/Abstract] OR adher*[Title/Abstract] OR participat*[Title/Abstract] OR attitude*[Title/Abstract] OR belief*[Title/Abstract] OR complian*[Title/Abstract] OR noncomplian*[Title/Abstract] OR nonadher*[Title/Abstract] OR persist*[Title/Abstract] OR refus*[Title/Abstract] OR interrupt*[Title/Abstract] OR dropout*[Title/Abstract] OR drop out*[Title/Abstract] OR "no show"[Title/Abstract])) OR ("Treatment Adherence and Compliance"[Mesh]))) AND (((("Drug Therapy"[Mesh] OR "drug therapy"[Subheading])) OR "Antirheumatic Agents"[Mesh]) OR (Antirheumatic[tiab] OR Anti Rheumatic[tiab])) OR NSAID*[Title/Abstract] OR "Drug Prescriptions"[Mesh] OR ((medication*[Text Word] OR prescrib*[Text Word] OR prescription*[Text Word]))) AND (((("Guideline"[Publication Type] OR "Guidelines as Topic"[Mesh])) OR ((Guideline*[Text Word] OR practice guideline*[Text Word] OR clinical guideline*[Text Word] OR guidance[Text Word] OR consensus[Text Word] OR recommendation*[Text Word]))) OR systematic[sb] | 1119        |
| #24    | Search (((("Rheumatic Diseases"[Mesh] OR "Rheumatology"[Mesh] OR Rheumat*[Title/Abstract] OR arthrit*[Title/Abstract] OR osteoarthritis*[Title/Abstract])) AND (((barrier*[Title/Abstract] OR attend*[Title/Abstract] OR adher*[Title/Abstract] OR participat*[Title/Abstract] OR attitude*[Title/Abstract] OR belief*[Title/Abstract] OR                                                                                                                                                                                                                                                                                                                                                                                                                                                                                                                                                                                                                                                                                                                                                                                                                                                                                         | 836         |

| Search Query                                                                                                                                                                                                                                                                                                                                                                                                                                                                                                                                                                                                                                                                                                                                                                                                                                                                                                                                      | Items found |
|---------------------------------------------------------------------------------------------------------------------------------------------------------------------------------------------------------------------------------------------------------------------------------------------------------------------------------------------------------------------------------------------------------------------------------------------------------------------------------------------------------------------------------------------------------------------------------------------------------------------------------------------------------------------------------------------------------------------------------------------------------------------------------------------------------------------------------------------------------------------------------------------------------------------------------------------------|-------------|
| complan*[Title/Abstract] OR noncomplan*[Title/Abstract] OR nonadher*[Title/Abstract] OR persist*[Title/Abstract] OR refus*[Title/Abstract] OR interrupt*[Title/Abstract] OR dropout*[Title/Abstract] OR drop out*[Title/Abstract] OR "no show"[Title/Abstract]) OR ("Treatment Adherence and Compliance"[Mesh])) AND (((((((("Drug Therapy"[Mesh] OR "drug therapy"[Subheading])) OR "Antirheumatic Agents"[Mesh]) OR (Antirheumatic[tiab] OR Anti Rheumatic[tiab])) OR NSAID*[Title/Abstract] OR "Drug Prescriptions"[Mesh]) OR ((medication*[Text Word] OR prescrib*[Text Word] OR prescription*[Text Word]))) AND (((("Guideline"[Publication Type] OR "Guidelines as Topic"[Mesh])) OR ((Guideline*[Text Word] OR practice guideline*[Text Word] OR clinical guideline*[Text Word] OR guidance[Text Word] OR consensus[Text Word] OR recommendation*[Text Word]))) OR systematic[sb]) Filters: Publication date from 2008/01/01 to 2018/12/31 |             |

## Embase

| No. | Query                                                                                                                                                                                                                                                                                                         | Results  |
|-----|---------------------------------------------------------------------------------------------------------------------------------------------------------------------------------------------------------------------------------------------------------------------------------------------------------------|----------|
| #1  | 'rheumatic disease'/exp                                                                                                                                                                                                                                                                                       | 243800   |
| #2  | 'rheumatology'/exp                                                                                                                                                                                                                                                                                            | 56468    |
| #3  | rheumat*:ti,ab OR arthrit*:ti,ab OR osteoarthritis*:ti,ab                                                                                                                                                                                                                                                     | 386252   |
| #4  | #1 OR #2 OR #3                                                                                                                                                                                                                                                                                                | 454910   |
| #5  | 'patient attitude'/exp<br>barrier*:ti,ab OR attend*:ti,ab OR adher*:ti,ab OR participat*:ti,ab OR attitude*:ti,ab OR belief*:ti,ab OR complian*:ti,ab OR noncomplan*:ti,ab OR nonadher*:ti,ab OR persist*:ti,ab OR refus*:ti,ab OR interrupt*:ti,ab OR dropout*:ti,ab OR 'drop out*':ti,ab OR 'no show':ti,ab | 347359   |
| #6  | #5 OR #6                                                                                                                                                                                                                                                                                                      | 2215780  |
| #7  | #7 OR #6                                                                                                                                                                                                                                                                                                      | 2421833  |
| #8  | 'drug therapy'/exp                                                                                                                                                                                                                                                                                            | 2411127  |
| #9  | 'drug therapy'/lnk                                                                                                                                                                                                                                                                                            | 3581573  |
| #10 | 'antirheumatic agent'/exp                                                                                                                                                                                                                                                                                     | 554502   |
| #11 | 'prescription'/exp<br>antirheumatic:ti,ab OR 'anti rheumatic':ti,ab OR nsaid*:ti,ab OR medication*:ti,ab OR                                                                                                                                                                                                   | 162993   |
| #12 | prescrib*:ti,ab OR prescription*:ti,ab                                                                                                                                                                                                                                                                        | 691289   |
| #13 | #8 OR #9 OR #10 OR #11 OR #12                                                                                                                                                                                                                                                                                 | 5488394  |
| #14 | #4 AND #7 AND #13<br>guideline*:ti,ab,de OR 'practice guideline*':ti,ab,de OR 'clinical guideline*':ti,ab,de OR                                                                                                                                                                                               | 19728    |
| #15 | guidance:ti,ab,de OR consensus:ti,ab,de OR recommendation*:ti,ab,de<br>(systematic OR method*) NEAR/3 (review* OR overview* OR study OR studies OR search* OR approach*):ti,ab,de                                                                                                                             | 1093831  |
| #16 | 'meta analy*':ti,ab,de OR 'meta-analy*':ti,ab,de OR metaanaly*:ti,ab,de                                                                                                                                                                                                                                       | 1245133  |
| #17 | 'systematic review'/exp OR 'meta analysis'/exp                                                                                                                                                                                                                                                                | 227900   |
| #18 | #16 OR #17 OR #18                                                                                                                                                                                                                                                                                             | 245463   |
| #19 | #15 OR #19                                                                                                                                                                                                                                                                                                    | 1358280  |
| #20 | #14 AND #20                                                                                                                                                                                                                                                                                                   | 2327838  |
| #21 | #14 AND #20                                                                                                                                                                                                                                                                                                   | 4209     |
| #22 | 'conference abstract'/it                                                                                                                                                                                                                                                                                      | 3034012  |
| #23 | #21 NOT #22                                                                                                                                                                                                                                                                                                   | 2169     |
| #24 | [2008-2018]/py                                                                                                                                                                                                                                                                                                | 13488242 |
| #25 | #23 AND #24                                                                                                                                                                                                                                                                                                   | 1559     |

## CINAHL

| Search ID# | Search Terms                            | Search Options                | Results |
|------------|-----------------------------------------|-------------------------------|---------|
| S1         | (MH "Rheumatology")                     | Search modes - Boolean/Phrase | 1,688   |
| S2         | (MH "Rheumatic Diseases+")              | Search modes - Boolean/Phrase | 34,412  |
| S3         | Rheumat* OR arthrit* OR osteoarthritis* | Search modes - Boolean/Phrase | 47,066  |
| S4         | S1 OR S2 OR S3                          | Search modes - Boolean/Phrase | 52,964  |

| Search ID# | Search Terms                                                                                                                                                                                                                           | Search Options                                                                | Results |
|------------|----------------------------------------------------------------------------------------------------------------------------------------------------------------------------------------------------------------------------------------|-------------------------------------------------------------------------------|---------|
| S5         | (MH "Patient Compliance+") OR (MH "Treatment Refusal")                                                                                                                                                                                 | Search modes - Boolean/Phrase                                                 | 32,574  |
| S6         | barrier* OR attend* OR adher* OR participat* OR attitude* OR belief* OR complian* OR noncomplian* OR nonadher* OR persist* OR refus* OR interrupt* OR dropout* OR drop out* OR "no show"                                               | Search modes - Boolean/Phrase                                                 | 480,915 |
| S7         | S5 OR S6                                                                                                                                                                                                                               | Search modes - Boolean/Phrase                                                 | 480,915 |
| S8         | (MH "Drug Therapy+")                                                                                                                                                                                                                   | Search modes - Boolean/Phrase                                                 | 95,449  |
| S9         | (MH "Prescriptions, Drug")                                                                                                                                                                                                             | Search modes - Boolean/Phrase                                                 | 5,539   |
| S10        | (MH "Antirheumatic Agents+")                                                                                                                                                                                                           | Search modes - Boolean/Phrase                                                 | 34,126  |
| S11        | Antirheumatic OR Anti Rheumatic OR NSAID* OR medication* OR prescrib* OR prescription*                                                                                                                                                 | Search modes - Boolean/Phrase                                                 | 126,536 |
| S12        | S8 OR S9 OR S10 OR S11                                                                                                                                                                                                                 | Search modes - Boolean/Phrase                                                 | 219,196 |
| S13        | S4 AND S7 AND S12                                                                                                                                                                                                                      | Search modes - Boolean/Phrase                                                 | 1,237   |
| S14        | ( Guideline* or guidance or consensus or recommendation* ) OR PT practice guidelines                                                                                                                                                   | Search modes - Boolean/Phrase                                                 | 180,116 |
| S15        | ( PT (Systematic Review or Meta Analysis) ) OR ( (((systematic or method*) N3 (review* or overview* or study or studies or search* or approach*)) or meta analy* or meta-analy* or metaanaly* ) ) OR ( (pooled N1 (data or analys*)) ) | Search modes - Boolean/Phrase                                                 | 169,204 |
| S16        | S14 OR S15                                                                                                                                                                                                                             | Search modes - Boolean/Phrase                                                 | 328,056 |
| S17        | S13 AND S16                                                                                                                                                                                                                            | Search modes - Boolean/Phrase                                                 | 293     |
| S18        | S13 AND S16                                                                                                                                                                                                                            | Limiters - Published Date: 20080101-20181231<br>Search modes - Boolean/Phrase | 210     |

## Cochrane Library

| ID  | Search                                                                                                                                                                                   | Hits   |
|-----|------------------------------------------------------------------------------------------------------------------------------------------------------------------------------------------|--------|
| #1  | MeSH descriptor: [Rheumatic Diseases] explode all trees                                                                                                                                  | 13904  |
| #2  | Rheumat* or arthrit* or osteoarthritis*                                                                                                                                                  | 34813  |
| #3  | #1 or #2                                                                                                                                                                                 | 35807  |
| #4  | MeSH descriptor: [Treatment Adherence and Compliance] explode all trees                                                                                                                  | 22898  |
| #5  | barrier* or attend* or adher* or participat* or attitude* or belief* or complian* or noncomplian* or nonadher* or persist* or refus* or interrupt* or dropout* or drop out* or "no show" | 191228 |
| #6  | #4 or #5                                                                                                                                                                                 | 198585 |
| #7  | #3 and #6                                                                                                                                                                                | 6747   |
| #8  | MeSH descriptor: [Drug Therapy] explode all trees                                                                                                                                        | 138470 |
| #9  | Antirheumatic or Anti Rheumatic or NSAID* or medication* or prescrib* or prescription*                                                                                                   | 93724  |
| #10 | MeSH descriptor: [Antirheumatic Agents] explode all trees                                                                                                                                | 10022  |
| #11 | #8 or #9 or #10                                                                                                                                                                          | 219453 |
| #12 | #7 and #11 Publication Year from 2008 to 2018                                                                                                                                            | 2135   |

Result 927 Cochrane Reviews and 48 Other Reviews

## Adherence to diets

### Guidelines and Systematic Reviews

| Database                                                  | Provider   | Hits | Date for search |
|-----------------------------------------------------------|------------|------|-----------------|
| PubMed                                                    | Pubmed.gov | 53   | 2018.06.25      |
| Embase                                                    | Embase.com | 132  | 2018.06.26      |
| CINAHL                                                    | Ebsco Host | 37   | 2018.06.26      |
| Cochrane                                                  | Wiley      | 320  | 2018.06.26      |
| Total                                                     |            | 542  | 2018.06.26      |
| Total after duplicate search in Endnote                   |            | 508  | 2018.06.26      |
| Total added to Screen after duplicate search in Covidence |            | 53   | 2018.09.27      |

### PubMed

| Search Query                                                                                                                                                                                                                                                                                                                                                                                                                                                                                                                                                                                                                                                                                                                                                                                                                                                                                                                                                                                                                                                                                                                                                              | Items found             |
|---------------------------------------------------------------------------------------------------------------------------------------------------------------------------------------------------------------------------------------------------------------------------------------------------------------------------------------------------------------------------------------------------------------------------------------------------------------------------------------------------------------------------------------------------------------------------------------------------------------------------------------------------------------------------------------------------------------------------------------------------------------------------------------------------------------------------------------------------------------------------------------------------------------------------------------------------------------------------------------------------------------------------------------------------------------------------------------------------------------------------------------------------------------------------|-------------------------|
| <a href="#">#11</a> Search "Rheumatic Diseases"[Mesh] OR "Rheumatology"[Mesh] OR Rheumat*[Title/Abstract] OR arthrit*[Title/Abstract] OR osteoarthritis*[Title/Abstract]                                                                                                                                                                                                                                                                                                                                                                                                                                                                                                                                                                                                                                                                                                                                                                                                                                                                                                                                                                                                  | <a href="#">333853</a>  |
| <a href="#">#12</a> Search ((barrier*[Title/Abstract] OR attend*[Title/Abstract] OR adher*[Title/Abstract] OR participat*[Title/Abstract] OR attitude*[Title/Abstract] OR belief*[Title/Abstract] OR complian*[Title/Abstract] OR noncomplian*[Title/Abstract] OR nonadher*[Title/Abstract] OR persist*[Title/Abstract] OR refus*[Title/Abstract] OR interrupt*[Title/Abstract] OR dropout*[Title/Abstract] OR drop out*[Title/Abstract] OR "no show"[Title/Abstract])) OR ("Treatment Adherence and Compliance"[Mesh])                                                                                                                                                                                                                                                                                                                                                                                                                                                                                                                                                                                                                                                   | <a href="#">1824104</a> |
| <a href="#">#13</a> Search (((("Diet Therapy"[Mesh] OR "diet therapy"[Subheading]) OR "Diet"[Mesh])) OR ((diet[Title/Abstract] OR diets[Title/Abstract]))) OR "Nutrition Therapy"[Mesh:noexp] OR nutrition therap*[Title/Abstract]                                                                                                                                                                                                                                                                                                                                                                                                                                                                                                                                                                                                                                                                                                                                                                                                                                                                                                                                        | <a href="#">478797</a>  |
| <a href="#">#14</a> Search (((("Rheumatic Diseases"[Mesh] OR "Rheumatology"[Mesh] OR Rheumat*[Title/Abstract] OR arthrit*[Title/Abstract] OR osteoarthritis*[Title/Abstract])) AND (((barrier*[Title/Abstract] OR attend*[Title/Abstract] OR adher*[Title/Abstract] OR participat*[Title/Abstract] OR attitude*[Title/Abstract] OR belief*[Title/Abstract] OR complian*[Title/Abstract] OR noncomplian*[Title/Abstract] OR nonadher*[Title/Abstract] OR persist*[Title/Abstract] OR refus*[Title/Abstract] OR interrupt*[Title/Abstract] OR dropout*[Title/Abstract] OR drop out*[Title/Abstract] OR "no show"[Title/Abstract])) OR ("Treatment Adherence and Compliance"[Mesh]))) AND (((("Diet Therapy"[Mesh] OR "diet therapy"[Subheading]) OR "Diet"[Mesh])) OR ((diet[Title/Abstract] OR diets[Title/Abstract]))) OR "Nutrition Therapy"[Mesh:noexp] OR nutrition therap*[Title/Abstract]                                                                                                                                                                                                                                                                            | <a href="#">349</a>     |
| <a href="#">#15</a> Search (("Guideline"[Publication Type] OR "Guidelines as Topic"[Mesh])) OR ((Guideline*[Text Word] OR practice guideline*[Text Word] OR clinical guideline*[Text Word] OR guidance[Text Word] OR consensus[Text Word] OR recommendation*[Text Word]))                                                                                                                                                                                                                                                                                                                                                                                                                                                                                                                                                                                                                                                                                                                                                                                                                                                                                                 | <a href="#">753621</a>  |
| <a href="#">#16</a> Search systematic[sb]                                                                                                                                                                                                                                                                                                                                                                                                                                                                                                                                                                                                                                                                                                                                                                                                                                                                                                                                                                                                                                                                                                                                 | <a href="#">367305</a>  |
| <a href="#">#17</a> Search (((("Guideline"[Publication Type] OR "Guidelines as Topic"[Mesh])) OR ((Guideline*[Text Word] OR practice guideline*[Text Word] OR clinical guideline*[Text Word] OR guidance[Text Word] OR consensus[Text Word] OR recommendation*[Text Word]))) OR systematic[sb])                                                                                                                                                                                                                                                                                                                                                                                                                                                                                                                                                                                                                                                                                                                                                                                                                                                                           | <a href="#">1025914</a> |
| <a href="#">#18</a> Search (((("Rheumatic Diseases"[Mesh] OR "Rheumatology"[Mesh] OR Rheumat*[Title/Abstract] OR arthrit*[Title/Abstract] OR osteoarthritis*[Title/Abstract])) AND (((barrier*[Title/Abstract] OR attend*[Title/Abstract] OR adher*[Title/Abstract] OR participat*[Title/Abstract] OR attitude*[Title/Abstract] OR belief*[Title/Abstract] OR complian*[Title/Abstract] OR noncomplian*[Title/Abstract] OR nonadher*[Title/Abstract] OR persist*[Title/Abstract] OR refus*[Title/Abstract] OR interrupt*[Title/Abstract] OR dropout*[Title/Abstract] OR drop out*[Title/Abstract] OR "no show"[Title/Abstract])) OR ("Treatment Adherence and Compliance"[Mesh]))) AND (((("Diet Therapy"[Mesh] OR "diet therapy"[Subheading]) OR "Diet"[Mesh])) OR ((diet[Title/Abstract] OR diets[Title/Abstract]))) OR "Nutrition Therapy"[Mesh:noexp] OR nutrition therap*[Title/Abstract])) AND (((("Guideline"[Publication Type] OR "Guidelines as Topic"[Mesh])) OR ((Guideline*[Text Word] OR practice guideline*[Text Word] OR clinical guideline*[Text Word] OR guidance[Text Word] OR consensus[Text Word] OR recommendation*[Text Word]))) OR systematic[sb]) | <a href="#">62</a>      |
| <a href="#">#19</a> Search (((("Rheumatic Diseases"[Mesh] OR "Rheumatology"[Mesh] OR Rheumat*[Title/Abstract] OR arthrit*[Title/Abstract] OR osteoarthritis*[Title/Abstract])) AND (((barrier*[Title/Abstract] OR attend*[Title/Abstract] OR adher*[Title/Abstract] OR participat*[Title/Abstract] OR attitude*[Title/Abstract] OR belief*[Title/Abstract] OR complian*[Title/Abstract] OR noncomplian*[Title/Abstract] OR nonadher*[Title/Abstract] OR persist*[Title/Abstract] OR refus*[Title/Abstract] OR interrupt*[Title/Abstract] OR dropout*[Title/Abstract] OR drop out*[Title/Abstract] OR "no show"[Title/Abstract])) OR ("Treatment Adherence and                                                                                                                                                                                                                                                                                                                                                                                                                                                                                                             | <a href="#">53</a>      |

| Search Query                                                                                                                                                                                                                                                                                                                                                                                                                                                                                                                                                       | Items found |
|--------------------------------------------------------------------------------------------------------------------------------------------------------------------------------------------------------------------------------------------------------------------------------------------------------------------------------------------------------------------------------------------------------------------------------------------------------------------------------------------------------------------------------------------------------------------|-------------|
| Compliance"[Mesh])) AND (((("Diet Therapy"[Mesh] OR "diet therapy"[Subheading]) OR "Diet"[Mesh])) OR ((diet[Title/Abstract] OR diets[Title/Abstract])) OR "Nutrition Therapy"[Mesh:noexp]) OR nutrition therap*[Title/Abstract])) AND (((("Guideline"[Publication Type] OR "Guidelines as Topic"[Mesh])) OR ((Guideline*[Text Word] OR practice guideline*[Text Word] OR clinical guideline*[Text Word] OR guidance[Text Word] OR consensus[Text Word] OR recommendation*[Text Word]))) OR systematic[sb]) Filters: Publication date from 2008/01/01 to 2018/12/31 |             |

## Embase

| No  | Query                                                                                                                                                                                                                                                                                   | Results |
|-----|-----------------------------------------------------------------------------------------------------------------------------------------------------------------------------------------------------------------------------------------------------------------------------------------|---------|
| #1  | 'rheumatic disease'/exp                                                                                                                                                                                                                                                                 | 244029  |
| #2  | 'rheumatology'/exp                                                                                                                                                                                                                                                                      | 56613   |
| #3  | rheumat*:ti,ab OR arthrit*:ti,ab OR osteoarthritis*:ti,ab,kw                                                                                                                                                                                                                            | 389442  |
| #4  | #1 OR #2 OR #3                                                                                                                                                                                                                                                                          | 458094  |
| #5  | 'diet therapy'/exp OR 'diet'/exp                                                                                                                                                                                                                                                        | 559373  |
| #6  | diet*:ti,ab                                                                                                                                                                                                                                                                             | 630342  |
| #7  | (nutrition* NEAR/2 therap*):ti,ab,kw                                                                                                                                                                                                                                                    | 7251    |
| #8  | #5 OR #6 OR #7                                                                                                                                                                                                                                                                          | 892885  |
| #9  | 'patient attitude'/exp                                                                                                                                                                                                                                                                  | 348193  |
| #10 | barrier*:ti,ab OR attend*:ti,ab OR adher*:ti,ab OR participat*:ti,ab OR attitude*:ti,ab OR belief*:ti,ab OR complian*:ti,ab OR noncomplian*:ti,ab OR nonadher*:ti,ab OR persist*:ti,ab OR refus*:ti,ab OR interrupt*:ti,ab OR dropout*:ti,ab OR 'drop out*':ti,ab OR 'no show':ti,ab,kw | 2219258 |
| #11 | #9 OR #10                                                                                                                                                                                                                                                                               | 2425766 |
| #12 | #4 AND #8 AND #11                                                                                                                                                                                                                                                                       | 1326    |
| #13 | 'conference abstract'/it                                                                                                                                                                                                                                                                | 3052310 |
| #14 | [2008-2018]/py                                                                                                                                                                                                                                                                          | 3       |
| #15 | #12 NOT #13                                                                                                                                                                                                                                                                             | 775     |
| #16 | #14 AND #15                                                                                                                                                                                                                                                                             | 491     |
| #17 | guideline*:ti,ab,de OR 'practice guideline*':ti,ab,de OR 'clinical guideline*':ti,ab,de OR guidance:ti,ab,de OR consensus:ti,ab,de OR recommendation*:ti,ab,de ((systematic OR method*) NEAR/3 (review* OR overview* OR study OR studies OR search* OR approach*)):ti,ab,de             | 1096056 |
| #18 | 'meta analy*':ti,ab,de OR 'meta-analy*':ti,ab,de OR metaanaly*:ti,ab,de                                                                                                                                                                                                                 | 1245133 |
| #19 | 'systematic review'/exp OR 'meta analysis'/exp                                                                                                                                                                                                                                          | 227900  |
| #20 | 'systematic review'/exp OR 'meta analysis'/exp                                                                                                                                                                                                                                          | 245463  |
| #21 | #17 OR #18 OR #19 OR #20                                                                                                                                                                                                                                                                | 2331961 |
| #22 | #16 AND #21                                                                                                                                                                                                                                                                             | 132     |

## Cinahl

| Search ID# | Search Terms                                           | Search Options                | Results |
|------------|--------------------------------------------------------|-------------------------------|---------|
| S1         | (MH "Rheumatology")                                    | Search modes - Boolean/Phrase | 1,693   |
| S2         | (MH "Rheumatic Diseases+")                             | Search modes - Boolean/Phrase | 34,482  |
| S3         | Rheumat* OR arthrit* OR osteoarthritis*                | Search modes - Boolean/Phrase | 47,018  |
| S4         | S1 OR S2 OR S3                                         | Search modes - Boolean/Phrase | 52,923  |
| S5         | (MH "Diet+")                                           | Search modes - Boolean/Phrase | 63,442  |
| S6         | (MH "Diet Therapy+")                                   | Search modes - Boolean/Phrase | 16,576  |
| S7         | diet* OR (nutrition* N2 (therap*))                     | Search modes - Boolean/Phrase | 119,494 |
| S8         | S5 OR S6 OR S7                                         | Search modes - Boolean/Phrase | 132,931 |
| S9         | (MH "Patient Compliance+") OR (MH "Treatment Refusal") | Search modes - Boolean/Phrase | 32,661  |

| Search ID# | Search Terms                                                                                                                                                                                                                           | Search Options                                                                | Results |
|------------|----------------------------------------------------------------------------------------------------------------------------------------------------------------------------------------------------------------------------------------|-------------------------------------------------------------------------------|---------|
| S10        | barrier* OR attend* OR adher* OR participat* OR attitude* OR belief* OR complian* OR noncomplian* OR nonadher* OR persist* OR refus* OR interrupt* OR dropout* OR drop out* OR "no show"                                               | Search modes - Boolean/Phrase                                                 | 482,203 |
| S11        | S9 OR S10                                                                                                                                                                                                                              | Search modes - Boolean/Phrase                                                 | 482,203 |
| S12        | S4 AND S8 AND S11                                                                                                                                                                                                                      | Search modes - Boolean/Phrase                                                 | 191     |
| S13        | ( Guideline* or guidance or consensus or recommendation* ) OR PT practice guidelines                                                                                                                                                   | Search modes - Boolean/Phrase                                                 | 180,650 |
| S14        | ( PT (Systematic Review or Meta Analysis) ) OR ( (((systematic or method*) N3 (review* or overview* or study or studies or search* or approach*)) or meta analy* or meta-analy* or metaanaly* ) ) OR ( (pooled N1 (data or analys*)) ) | Search modes - Boolean/Phrase                                                 | 169,854 |
| S15        | S13 OR S14                                                                                                                                                                                                                             | Search modes - Boolean/Phrase                                                 | 329,145 |
| S16        | S12 AND S15                                                                                                                                                                                                                            | Search modes - Boolean/Phrase                                                 | 48      |
| S17        | S12 AND S15                                                                                                                                                                                                                            | Limiters - Published Date: 20080101-20181231<br>Search modes - Boolean/Phrase | 37      |

## Cochrane Library

| ID  | Search                                                                                                                                                                                   | Hits   |
|-----|------------------------------------------------------------------------------------------------------------------------------------------------------------------------------------------|--------|
| #1  | MeSH descriptor: [Rheumatology] explode all trees                                                                                                                                        | 102    |
| #2  | MeSH descriptor: [Rheumatic Diseases] explode all trees                                                                                                                                  | 13904  |
| #3  | Rheumat* or arthrit* or osteoarthritis*                                                                                                                                                  | 34812  |
| #4  | #1 or #2 or #3                                                                                                                                                                           | 35806  |
| #5  | MeSH descriptor: [Diet] explode all trees                                                                                                                                                | 16738  |
| #6  | MeSH descriptor: [Diet Therapy] explode all trees                                                                                                                                        | 5382   |
| #7  | diet*                                                                                                                                                                                    | 71260  |
| #8  | nutrition* next therap*                                                                                                                                                                  | 691    |
| #9  | #5 or #6 or #7 or #8                                                                                                                                                                     | 74185  |
| #10 | MeSH descriptor: [Rheumatic Diseases] explode all trees                                                                                                                                  | 13904  |
| #11 | Rheumat* or arthrit* or osteoarthritis*                                                                                                                                                  | 34812  |
| #12 | #10 or #11                                                                                                                                                                               | 35806  |
| #13 | MeSH descriptor: [Treatment Adherence and Compliance] explode all trees                                                                                                                  | 22899  |
| #14 | barrier* or attend* or adher* or participat* or attitude* or belief* or complian* or noncomplian* or nonadher* or persist* or refus* or interrupt* or dropout* or drop out* or "no show" | 191237 |
| #15 | #13 or #14                                                                                                                                                                               | 198594 |
| #16 | #12 and #15                                                                                                                                                                              | 6745   |
| #17 | #4 and #9 and #16 Publication Year from 2008 to 2018                                                                                                                                     | 483    |

312 Cochrane Reviews and 8 Other Reviews

## Adherence to exercise

### Guidelines and Systematic Reviews

| Database                                                  | Provider   | Hits | Date for search |
|-----------------------------------------------------------|------------|------|-----------------|
| Pubmed                                                    | Pubmed.gov | 531  | 2018.06.26      |
| Embase                                                    | Embase.com | 875  | 2018.06.26      |
| CINAHL                                                    | Ebsco Host | 212  | 2018.06.26      |
| Cochrane                                                  | Wiley      | 739  | 2018.06.26      |
| Total                                                     |            | 2357 | 2018.06.26      |
| Total after duplicate search in Endnote                   |            | 1943 | 2018.06.26      |
| Total added to screen after duplicate search in Covidence |            | 832  | 2018.09.27      |

## PubMed

| Search             | Query                                                                                                                                                                                                                                                                                                                                                                                                                                                                                                                                                                                                                                                                                                                                                                                                                                                                                                                                                                                                                                                                                                                                                                                                                                     | Items found             |
|--------------------|-------------------------------------------------------------------------------------------------------------------------------------------------------------------------------------------------------------------------------------------------------------------------------------------------------------------------------------------------------------------------------------------------------------------------------------------------------------------------------------------------------------------------------------------------------------------------------------------------------------------------------------------------------------------------------------------------------------------------------------------------------------------------------------------------------------------------------------------------------------------------------------------------------------------------------------------------------------------------------------------------------------------------------------------------------------------------------------------------------------------------------------------------------------------------------------------------------------------------------------------|-------------------------|
| <a href="#">#1</a> | Search "Rheumatic Diseases"[Mesh] OR "Rheumatology"[Mesh] OR Rheumat*[Title/Abstract] OR arthrit*[Title/Abstract] OR osteoarthritis*[Title/Abstract]                                                                                                                                                                                                                                                                                                                                                                                                                                                                                                                                                                                                                                                                                                                                                                                                                                                                                                                                                                                                                                                                                      | <a href="#">333913</a>  |
| <a href="#">#2</a> | Search (((("Exercise Therapy"[Mesh]) OR "Sports"[Mesh]) OR "Exercise"[Mesh]) OR "Exercise Movement Techniques"[Mesh])) OR ((kinesiotherap*[Title/Abstract] OR exercis*[Title/Abstract] OR motion*[Title/Abstract] OR train*[Title/Abstract] OR sport*[Title/Abstract] OR fitness[Title/Abstract]))                                                                                                                                                                                                                                                                                                                                                                                                                                                                                                                                                                                                                                                                                                                                                                                                                                                                                                                                        | <a href="#">1035094</a> |
| <a href="#">#3</a> | Search ((barrier*[Title/Abstract] OR attend*[Title/Abstract] OR adher*[Title/Abstract] OR participat*[Title/Abstract] OR attitude*[Title/Abstract] OR belief*[Title/Abstract] OR complian*[Title/Abstract] OR noncomplian*[Title/Abstract] OR nonadher*[Title/Abstract] OR persist*[Title/Abstract] OR refus*[Title/Abstract] OR interrupt*[Title/Abstract] OR dropout*[Title/Abstract] OR drop out*[Title/Abstract] OR "no show"[Title/Abstract])) OR ("Treatment Adherence and Compliance"[Mesh])                                                                                                                                                                                                                                                                                                                                                                                                                                                                                                                                                                                                                                                                                                                                       | <a href="#">1824492</a> |
| <a href="#">#4</a> | Search (((("Rheumatic Diseases"[Mesh] OR "Rheumatology"[Mesh] OR Rheumat*[Title/Abstract] OR arthrit*[Title/Abstract] OR osteoarthritis*[Title/Abstract])) AND (((("Exercise Therapy"[Mesh]) OR "Sports"[Mesh]) OR "Exercise"[Mesh]) OR "Exercise Movement Techniques"[Mesh])) OR ((kinesiotherap*[Title/Abstract] OR exercis*[Title/Abstract] OR motion*[Title/Abstract] OR train*[Title/Abstract] OR sport*[Title/Abstract] OR fitness[Title/Abstract]))) AND (((barrier*[Title/Abstract] OR attend*[Title/Abstract] OR adher*[Title/Abstract] OR participat*[Title/Abstract] OR attitude*[Title/Abstract] OR belief*[Title/Abstract] OR complian*[Title/Abstract] OR noncomplian*[Title/Abstract] OR nonadher*[Title/Abstract] OR persist*[Title/Abstract] OR refus*[Title/Abstract] OR interrupt*[Title/Abstract] OR dropout*[Title/Abstract] OR drop out*[Title/Abstract] OR "no show"[Title/Abstract])) OR ("Treatment Adherence and Compliance"[Mesh]))                                                                                                                                                                                                                                                                            | <a href="#">3827</a>    |
| <a href="#">#5</a> | Search systematic[sb]                                                                                                                                                                                                                                                                                                                                                                                                                                                                                                                                                                                                                                                                                                                                                                                                                                                                                                                                                                                                                                                                                                                                                                                                                     | <a href="#">367437</a>  |
| <a href="#">#6</a> | Search (("Guideline"[Publication Type] OR "Guidelines as Topic"[Mesh])) OR ((Guideline*[Text Word] OR practice guideline*[Text Word] OR clinical guideline*[Text Word] OR guidance[Text Word] OR consensus[Text Word] OR recommendation*[Text Word]))                                                                                                                                                                                                                                                                                                                                                                                                                                                                                                                                                                                                                                                                                                                                                                                                                                                                                                                                                                                     | <a href="#">753828</a>  |
| <a href="#">#7</a> | Search (systematic[sb]) OR (((("Guideline"[Publication Type] OR "Guidelines as Topic"[Mesh])) OR ((Guideline*[Text Word] OR practice guideline*[Text Word] OR clinical guideline*[Text Word] OR guidance[Text Word] OR consensus[Text Word] OR recommendation*[Text Word]))                                                                                                                                                                                                                                                                                                                                                                                                                                                                                                                                                                                                                                                                                                                                                                                                                                                                                                                                                               | <a href="#">1026218</a> |
| <a href="#">#8</a> | Search (((("Rheumatic Diseases"[Mesh] OR "Rheumatology"[Mesh] OR Rheumat*[Title/Abstract] OR arthrit*[Title/Abstract] OR osteoarthritis*[Title/Abstract])) AND (((("Exercise Therapy"[Mesh]) OR "Sports"[Mesh]) OR "Exercise"[Mesh]) OR "Exercise Movement Techniques"[Mesh])) OR ((kinesiotherap*[Title/Abstract] OR exercis*[Title/Abstract] OR motion*[Title/Abstract] OR train*[Title/Abstract] OR sport*[Title/Abstract] OR fitness[Title/Abstract]))) AND (((barrier*[Title/Abstract] OR attend*[Title/Abstract] OR adher*[Title/Abstract] OR participat*[Title/Abstract] OR attitude*[Title/Abstract] OR belief*[Title/Abstract] OR complian*[Title/Abstract] OR noncomplian*[Title/Abstract] OR nonadher*[Title/Abstract] OR persist*[Title/Abstract] OR refus*[Title/Abstract] OR interrupt*[Title/Abstract] OR dropout*[Title/Abstract] OR drop out*[Title/Abstract] OR "no show"[Title/Abstract])) OR ("Treatment Adherence and Compliance"[Mesh]))) AND ((systematic[sb]) OR (((("Guideline"[Publication Type] OR "Guidelines as Topic"[Mesh])) OR ((Guideline*[Text Word] OR practice guideline*[Text Word] OR clinical guideline*[Text Word] OR guidance[Text Word] OR consensus[Text Word] OR recommendation*[Text Word])) | <a href="#">663</a>     |

| Search | Query                                                                                                                                                                                                                                                                                                                                                                                                                                                                                                                                                                                                                                                                                                                                                                                                                                                                                                                                                                                                                                                                                                                                                                                                                                                                                               | Items found |
|--------|-----------------------------------------------------------------------------------------------------------------------------------------------------------------------------------------------------------------------------------------------------------------------------------------------------------------------------------------------------------------------------------------------------------------------------------------------------------------------------------------------------------------------------------------------------------------------------------------------------------------------------------------------------------------------------------------------------------------------------------------------------------------------------------------------------------------------------------------------------------------------------------------------------------------------------------------------------------------------------------------------------------------------------------------------------------------------------------------------------------------------------------------------------------------------------------------------------------------------------------------------------------------------------------------------------|-------------|
| #9     | Search (((("Rheumatic Diseases"[Mesh] OR "Rheumatology"[Mesh] OR Rheumat*[Title/Abstract] OR arthrit*[Title/Abstract] OR osteoarthritis*[Title/Abstract])) AND (((("Exercise Therapy"[Mesh]) OR "Sports"[Mesh]) OR "Exercise"[Mesh]) OR "Exercise Movement Techniques"[Mesh])) OR ((kinesiotherap*[Title/Abstract] OR exercise*[Title/Abstract] OR motion*[Title/Abstract] OR train*[Title/Abstract] OR sport*[Title/Abstract] OR fitness[Title/Abstract]))) AND (((barrier*[Title/Abstract] OR attend*[Title/Abstract] OR adher*[Title/Abstract] OR participat*[Title/Abstract] OR attitude*[Title/Abstract] OR belief*[Title/Abstract] OR complian*[Title/Abstract] OR noncomplian*[Title/Abstract] OR nonadher*[Title/Abstract] OR persist*[Title/Abstract] OR refus*[Title/Abstract] OR interrupt*[Title/Abstract] OR dropout*[Title/Abstract] OR drop out*[Title/Abstract] OR "no show"[Title/Abstract])) OR ("Treatment Adherence and Compliance"[Mesh]))) AND ((systematic[sb]) OR (((("Guideline"[Publication Type] OR "Guidelines as Topic"[Mesh]) OR ((Guideline*[Text Word] OR practice guideline*[Text Word] OR clinical guideline*[Text Word] OR guidance[Text Word] OR consensus[Text Word] OR recommendation*[Text Word])))) Filters: Publication date from 2008/01/01 to 2018/12/31 | 531         |

## Embase

| No. | Query                                                                                                                                                                                                                                                                                | Results  |
|-----|--------------------------------------------------------------------------------------------------------------------------------------------------------------------------------------------------------------------------------------------------------------------------------------|----------|
| #1  | 'rheumatic disease'/exp                                                                                                                                                                                                                                                              | 243800   |
| #2  | 'rheumatology'/exp                                                                                                                                                                                                                                                                   | 56468    |
| #3  | rheumat*:ti,ab OR arthrit*:ti,ab OR osteoarthritis*:ti,ab                                                                                                                                                                                                                            | 386252   |
| #4  | #1 OR #2 OR #3                                                                                                                                                                                                                                                                       | 456269   |
| #5  | 'kinesiotherapy'/exp                                                                                                                                                                                                                                                                 | 69267    |
| #6  | 'exercise'/exp                                                                                                                                                                                                                                                                       | 299635   |
| #7  | kinesiotherap*:ti,ab OR exercise*:ti,ab OR motion*:ti,ab OR train*:ti,ab OR sport*:ti,ab OR fitness:ti,ab                                                                                                                                                                            | 1146564  |
| #8  | 'sport'/exp                                                                                                                                                                                                                                                                          | 142334   |
| #9  | 'physical activity, capacity and performance'/exp OR 'fitness'/exp                                                                                                                                                                                                                   | 807017   |
| #10 | #5 OR #6 OR #7 OR #8 OR #9                                                                                                                                                                                                                                                           | 1644300  |
| #11 | 'patient attitude'/exp                                                                                                                                                                                                                                                               | 347359   |
| #12 | barrier*:ti,ab OR attend*:ti,ab OR adher*:ti,ab OR participat*:ti,ab OR attitude*:ti,ab OR belief*:ti,ab OR complian*:ti,ab OR noncomplian*:ti,ab OR nonadher*:ti,ab OR persist*:ti,ab OR refus*:ti,ab OR interrupt*:ti,ab OR dropout*:ti,ab OR 'drop out*':ti,ab OR 'no show':ti,ab | 2215780  |
| #13 | #11 OR #12                                                                                                                                                                                                                                                                           | 2425764  |
| #14 | #4 AND #10 AND #13                                                                                                                                                                                                                                                                   | 8808     |
| #15 | guideline*:ti,ab,de OR 'practice guideline*':ti,ab,de OR 'clinical guideline*':ti,ab,de OR guidance:ti,ab,de OR consensus:ti,ab,de OR recommendation*:ti,ab,de                                                                                                                       | 1096056  |
| #16 | ((systematic OR method*) NEAR/3 (review* OR overview* OR study OR studies OR search* OR approach*)):ti,ab,de                                                                                                                                                                         | 1245133  |
| #17 | 'meta analy*':ti,ab,de OR 'meta-analy*':ti,ab,de OR metaanaly*:ti,ab,de                                                                                                                                                                                                              | 227900   |
| #18 | 'systematic review'/exp OR 'meta analysis'/exp                                                                                                                                                                                                                                       | 245463   |
| #19 | #15 OR #16 OR #17 OR #18                                                                                                                                                                                                                                                             | 2331961  |
| #20 | #14 AND #19                                                                                                                                                                                                                                                                          | 2181     |
| #21 | 'conference abstract'/it                                                                                                                                                                                                                                                             | 3052310  |
| #22 | #20 NOT #21                                                                                                                                                                                                                                                                          | 1113     |
| #23 | [2008-2018]/py                                                                                                                                                                                                                                                                       | 13512863 |
| #24 | #22 AND #23                                                                                                                                                                                                                                                                          | 875      |

## Cochrane

| ID | Search                                                                  | Hits  |
|----|-------------------------------------------------------------------------|-------|
| #1 | MeSH descriptor: [Rheumatic Diseases] explode all trees                 | 13904 |
| #2 | Rheumat* or arthrit* or osteoarthritis*                                 | 34812 |
| #3 | #1 or #2                                                                | 35806 |
| #4 | MeSH descriptor: [Treatment Adherence and Compliance] explode all trees | 22899 |

| <b>ID</b> | <b>Search</b>                                                                                                                                                                            | <b>Hits</b> |
|-----------|------------------------------------------------------------------------------------------------------------------------------------------------------------------------------------------|-------------|
| #5        | barrier* or attend* or adher* or participat* or attitude* or belief* or complian* or noncomplian* or nonadher* or persist* or refus* or interrupt* or dropout* or drop out* or "no show" | 191237      |
| #6        | #4 or #5                                                                                                                                                                                 | 198594      |
| #7        | #3 and #6                                                                                                                                                                                | 6745        |
| #8        | MeSH descriptor: [Exercise] explode all trees                                                                                                                                            | 21284       |
| #9        | MeSH descriptor: [Exercise Therapy] explode all trees                                                                                                                                    | 11890       |
| #10       | MeSH descriptor: [Exercise Movement Techniques] explode all trees                                                                                                                        | 1942        |
| #11       | MeSH descriptor: [Sports] explode all trees                                                                                                                                              | 14188       |
| #12       | kinesiotherap* or exercise* or motion* or train* or sport* or fitness                                                                                                                    | 142748      |
| #13       | #8 or #9 or #10 or #11 or #12                                                                                                                                                            | 144639      |
| #14       | #7 and #13 Publication Year from 2008 to 2018                                                                                                                                            | 1956        |

685 Cochrane Reviews and 54 Other Reviews

## Adherence to clinical visits

| Database                                                  | Provider   | Hits | Date for search |
|-----------------------------------------------------------|------------|------|-----------------|
| Pubmed                                                    | Pubmed.gov | 333  | 2018.06.27      |
| Embase                                                    | Embase.com | 492  | 2018.06.27      |
| CINAHL                                                    | Ebsco Host | 212  | 2018.06.27      |
| Cochrane                                                  | Wiley      | 790  | 2018.06.27      |
| Total                                                     |            | 1827 | 2018.06.27      |
| Total after duplicate search in Endnote                   |            | 1588 | 2018.06.27      |
| Total added to Screen after duplicate search in Covidense |            | 224  | 2018.09.27      |

## PubMed

| Search | Query                                                                                                                                                                                                                                                                                                                                                                                                                                                                                                                                                                                                                                                                                                                                                                                                                                                                                                                                                                                                                                                                                                                                                                                                                                                                                       | Items found |
|--------|---------------------------------------------------------------------------------------------------------------------------------------------------------------------------------------------------------------------------------------------------------------------------------------------------------------------------------------------------------------------------------------------------------------------------------------------------------------------------------------------------------------------------------------------------------------------------------------------------------------------------------------------------------------------------------------------------------------------------------------------------------------------------------------------------------------------------------------------------------------------------------------------------------------------------------------------------------------------------------------------------------------------------------------------------------------------------------------------------------------------------------------------------------------------------------------------------------------------------------------------------------------------------------------------|-------------|
| #54    | Search "Rheumatic Diseases"[Mesh] OR "Rheumatology"[Mesh] OR Rheumat*[Title/Abstract] OR arthrit*[Title/Abstract] OR osteoarthritis*[Title/Abstract]                                                                                                                                                                                                                                                                                                                                                                                                                                                                                                                                                                                                                                                                                                                                                                                                                                                                                                                                                                                                                                                                                                                                        | 333946      |
| #55    | Search (((("Referral and Consultation"[Mesh])) OR ("Appointments and Schedules"[Mesh:noexp])) OR (appointment*[Title/Abstract] OR schedule*[Title/Abstract] OR visit*[Title/Abstract] OR "Ambulatory Care"[Mesh:noexp] OR outpatient*[Title/Abstract] OR out patient*[Title/Abstract] OR ambulator*[Title/Abstract] OR consultat*[Title/Abstract]))                                                                                                                                                                                                                                                                                                                                                                                                                                                                                                                                                                                                                                                                                                                                                                                                                                                                                                                                         | 643230      |
| #56    | Search ((barrier*[Title/Abstract] OR attend*[Title/Abstract] OR adher*[Title/Abstract] OR participat*[Title/Abstract] OR attitude*[Title/Abstract] OR belief*[Title/Abstract] OR complian*[Title/Abstract] OR noncomplian*[Title/Abstract] OR nonadher*[Title/Abstract] OR persist*[Title/Abstract] OR refus*[Title/Abstract] OR interrupt*[Title/Abstract] OR dropout*[Title/Abstract] OR drop out*[Title/Abstract] OR "no show"[Title/Abstract])) OR ("Treatment Adherence and Compliance"[Mesh])                                                                                                                                                                                                                                                                                                                                                                                                                                                                                                                                                                                                                                                                                                                                                                                         | 1824936     |
| #57    | Search (((("Rheumatic Diseases"[Mesh] OR "Rheumatology"[Mesh] OR Rheumat*[Title/Abstract] OR arthrit*[Title/Abstract] OR osteoarthritis*[Title/Abstract])) AND (((("Referral and Consultation"[Mesh])) OR ("Appointments and Schedules"[Mesh:noexp])) OR (appointment*[Title/Abstract] OR schedule*[Title/Abstract] OR visit*[Title/Abstract] OR "Ambulatory Care"[Mesh:noexp] OR outpatient*[Title/Abstract] OR out patient*[Title/Abstract] OR ambulator*[Title/Abstract] OR consultat*[Title/Abstract]))) AND (((barrier*[Title/Abstract] OR attend*[Title/Abstract] OR adher*[Title/Abstract] OR participat*[Title/Abstract] OR attitude*[Title/Abstract] OR belief*[Title/Abstract] OR complian*[Title/Abstract] OR noncomplian*[Title/Abstract] OR nonadher*[Title/Abstract] OR persist*[Title/Abstract] OR refus*[Title/Abstract] OR interrupt*[Title/Abstract] OR dropout*[Title/Abstract] OR drop out*[Title/Abstract] OR "no show"[Title/Abstract])) OR ("Treatment Adherence and Compliance"[Mesh]))                                                                                                                                                                                                                                                                             | 2875        |
| #58    | Search (("Guideline"[Publication Type] OR "Guidelines as Topic"[Mesh])) OR ((Guideline*[Text Word] OR practice guideline*[Text Word] OR clinical guideline*[Text Word] OR guidance[Text Word] OR consensus[Text Word] OR recommendation*[Text Word]))                                                                                                                                                                                                                                                                                                                                                                                                                                                                                                                                                                                                                                                                                                                                                                                                                                                                                                                                                                                                                                       | 754051      |
| #59    | Search systematic[sb]                                                                                                                                                                                                                                                                                                                                                                                                                                                                                                                                                                                                                                                                                                                                                                                                                                                                                                                                                                                                                                                                                                                                                                                                                                                                       | 367576      |
| #60    | Search (((("Guideline"[Publication Type] OR "Guidelines as Topic"[Mesh])) OR ((Guideline*[Text Word] OR practice guideline*[Text Word] OR clinical guideline*[Text Word] OR guidance[Text Word] OR consensus[Text Word] OR recommendation*[Text Word]))) OR systematic[sb]                                                                                                                                                                                                                                                                                                                                                                                                                                                                                                                                                                                                                                                                                                                                                                                                                                                                                                                                                                                                                  | 1026543     |
| #61    | Search ((((((("Rheumatic Diseases"[Mesh] OR "Rheumatology"[Mesh] OR Rheumat*[Title/Abstract] OR arthrit*[Title/Abstract] OR osteoarthritis*[Title/Abstract])) AND (((("Referral and Consultation"[Mesh])) OR ("Appointments and Schedules"[Mesh:noexp])) OR (appointment*[Title/Abstract] OR schedule*[Title/Abstract] OR visit*[Title/Abstract] OR "Ambulatory Care"[Mesh:noexp] OR outpatient*[Title/Abstract] OR out patient*[Title/Abstract] OR ambulator*[Title/Abstract] OR consultat*[Title/Abstract]))) AND (((barrier*[Title/Abstract] OR attend*[Title/Abstract] OR adher*[Title/Abstract] OR participat*[Title/Abstract] OR attitude*[Title/Abstract] OR belief*[Title/Abstract] OR complian*[Title/Abstract] OR noncomplian*[Title/Abstract] OR nonadher*[Title/Abstract] OR persist*[Title/Abstract] OR refus*[Title/Abstract] OR interrupt*[Title/Abstract] OR dropout*[Title/Abstract] OR drop out*[Title/Abstract] OR "no show"[Title/Abstract])) OR ("Treatment Adherence and Compliance"[Mesh]))) AND (((("Guideline"[Publication Type] OR "Guidelines as Topic"[Mesh])) OR ((Guideline*[Text Word] OR practice guideline*[Text Word] OR clinical guideline*[Text Word] OR guidance[Text Word] OR consensus[Text Word] OR recommendation*[Text Word]))) OR systematic[sb] | 426         |

| Search | Query                                                                                                                                                                                                                                                                                                                                                                                                                                                                                                                                                                                                                                                                                                                                                                                                                                                                                                                                                                                                                                                                                                                                                                                                                                                                                                                                             | Items found |
|--------|---------------------------------------------------------------------------------------------------------------------------------------------------------------------------------------------------------------------------------------------------------------------------------------------------------------------------------------------------------------------------------------------------------------------------------------------------------------------------------------------------------------------------------------------------------------------------------------------------------------------------------------------------------------------------------------------------------------------------------------------------------------------------------------------------------------------------------------------------------------------------------------------------------------------------------------------------------------------------------------------------------------------------------------------------------------------------------------------------------------------------------------------------------------------------------------------------------------------------------------------------------------------------------------------------------------------------------------------------|-------------|
| #62    | Search (((("Rheumatic Diseases"[Mesh] OR "Rheumatology"[Mesh] OR Rheumat*[Title/Abstract] OR arthrit*[Title/Abstract] OR osteoarthritis*[Title/Abstract])) AND (((("Referral and Consultation"[Mesh])) OR ("Appointments and Schedules"[Mesh:noexp])) OR (appointment*[Title/Abstract] OR schedule*[Title/Abstract] OR visit*[Title/Abstract] OR "Ambulatory Care"[Mesh:noexp] OR outpatient*[Title/Abstract] OR out patient*[Title/Abstract] OR ambulator*[Title/Abstract] OR consultat*[Title/Abstract]))) AND (((barrier*[Title/Abstract] OR attend*[Title/Abstract] OR adher*[Title/Abstract] OR participat*[Title/Abstract] OR attitude*[Title/Abstract] OR belie*[Title/Abstract] OR complian*[Title/Abstract] OR noncompliant*[Title/Abstract] OR nonadher*[Title/Abstract] OR persist*[Title/Abstract] OR refus*[Title/Abstract] OR interrupt*[Title/Abstract] OR dropout*[Title/Abstract] OR drop out*[Title/Abstract] OR "no show"[Title/Abstract])) OR ("Treatment Adherence and Compliance"[Mesh]))) AND (((("Guideline"[Publication Type] OR "Guidelines as Topic"[Mesh])) OR ((Guideline*[Text Word] OR practice guideline*[Text Word] OR clinical guideline*[Text Word] OR guidance[Text Word] OR consensus[Text Word] OR recommendation*[Text Word]))) OR systematic[sb]) Filters: Publication date from 2008/01/01 to 2018/12/31 | 333         |

## Embase

| No. | Query                                                                                                                                                                                                                                                                                                          | Results  |
|-----|----------------------------------------------------------------------------------------------------------------------------------------------------------------------------------------------------------------------------------------------------------------------------------------------------------------|----------|
| #1  | 'rheumatic disease'/exp                                                                                                                                                                                                                                                                                        | 243800   |
| #2  | 'rheumatology'/exp                                                                                                                                                                                                                                                                                             | 56468    |
| #3  | rheumat*:ti,ab OR arthrit*:ti,ab OR osteoarthritis*:ti,ab                                                                                                                                                                                                                                                      | 386252   |
| #4  | #1 OR #2 OR #3                                                                                                                                                                                                                                                                                                 | 456468   |
| #5  | 'ambulatory care'/exp OR 'outpatient'/exp OR 'consultation'/exp<br>outpatient*:ti,ab OR 'out patient*':ti,ab OR visit*:ti,ab OR appointment*:ti,ab OR schedule*:ti,ab                                                                                                                                          | 236832   |
| #6  | OR ambulator*:ti,ab OR consult*:ti,ab                                                                                                                                                                                                                                                                          | 926252   |
| #7  | #5 OR #6                                                                                                                                                                                                                                                                                                       | 975746   |
| #8  | 'patient attitude'/exp<br>barrier*:ti,ab OR attend*:ti,ab OR adher*:ti,ab OR participat*:ti,ab OR attitude*:ti,ab OR belie*:ti,ab OR complian*:ti,ab OR noncompliant*:ti,ab OR nonadher*:ti,ab OR persist*:ti,ab OR refus*:ti,ab OR interrupt*:ti,ab OR dropout*:ti,ab OR 'drop out*':ti,ab OR 'no show':ti,ab | 2215780  |
| #9  | #8 OR #9                                                                                                                                                                                                                                                                                                       | 2427310  |
| #10 | #4 AND #7 AND #10                                                                                                                                                                                                                                                                                              | 7649     |
| #11 | guideline*:ti,ab,de OR 'practice guideline*':ti,ab,de OR 'clinical guideline*':ti,ab,de OR guidance:ti,ab,de OR consensus:ti,ab,de OR recommendation*:ti,ab,de<br>((systematic OR method*) NEAR/3 (review* OR overview* OR study OR studies OR search* OR approach*)):ti,ab,de                                 | 1097142  |
| #12 | 'meta analy*':ti,ab,de OR 'meta-analy*':ti,ab,de OR metaanaly*:ti,ab,de                                                                                                                                                                                                                                        | 1245133  |
| #13 | 'systematic review'/exp OR 'meta analysis'/exp                                                                                                                                                                                                                                                                 | 227900   |
| #14 | #12 OR #13 OR #14 OR #15                                                                                                                                                                                                                                                                                       | 245463   |
| #15 | #11 AND #16                                                                                                                                                                                                                                                                                                    | 2334099  |
| #16 | 'conference abstract'/it                                                                                                                                                                                                                                                                                       | 1936     |
| #17 | [2008-2018]/py                                                                                                                                                                                                                                                                                                 | 3016111  |
| #18 | #17 NOT #18                                                                                                                                                                                                                                                                                                    | 13525779 |
| #19 | #19 AND #20                                                                                                                                                                                                                                                                                                    | 667      |
| #20 | #19 AND #20                                                                                                                                                                                                                                                                                                    | 492      |

## CINAHL

| Search ID# | Search Terms                            | Search Options                | Results |
|------------|-----------------------------------------|-------------------------------|---------|
| S1         | (MH "Rheumatology")                     | Search modes - Boolean/Phrase | 1,693   |
| S2         | (MH "Rheumatic Diseases+")              | Search modes - Boolean/Phrase | 34,482  |
| S3         | Rheumat* OR arthrit* OR osteoarthritis* | Search modes - Boolean/Phrase | 47,018  |
| S4         | S1 OR S2 OR S3                          | Search modes - Boolean/Phrase | 52,923  |

| Search ID# | Search Terms                                                                                                                                                                                                                           | Search Options                                                                | Results |
|------------|----------------------------------------------------------------------------------------------------------------------------------------------------------------------------------------------------------------------------------------|-------------------------------------------------------------------------------|---------|
| S5         | (MH "Appointments and Schedules+") OR (MH "Referral and Consultation+")                                                                                                                                                                | Search modes - Boolean/Phrase                                                 | 32,941  |
| S6         | (MH "Ambulatory Care")                                                                                                                                                                                                                 | Search modes - Boolean/Phrase                                                 | 7,211   |
| S7         | (MH "Outpatients")                                                                                                                                                                                                                     | Search modes - Boolean/Phrase                                                 | 36,824  |
| S8         | appointment* OR schedule* OR outpatient* OR out patient* OR ambulator* OR consultat* OR visit*                                                                                                                                         | Search modes - Boolean/Phrase                                                 | 195,945 |
| S9         | S5 OR S6 OR S7 OR S8                                                                                                                                                                                                                   | Search modes - Boolean/Phrase                                                 | 199,399 |
| S10        | (MH "Patient Compliance+") OR (MH "Treatment Refusal")                                                                                                                                                                                 | Search modes - Boolean/Phrase                                                 | 32,661  |
| S11        | barrier* OR attend* OR adher* OR participat* OR attitude* OR belief* OR complian* OR noncomplan* OR nonadher* OR persist* OR refus* OR interrupt* OR dropout* OR drop out* OR "no show"                                                | Search modes - Boolean/Phrase                                                 | 482,203 |
| S12        | S10 OR S11                                                                                                                                                                                                                             | Search modes - Boolean/Phrase                                                 | 482,203 |
| S13        | S4 AND S9 AND S12                                                                                                                                                                                                                      | Search modes - Boolean/Phrase                                                 | 830     |
| S14        | ( Guideline* or guidance or consensus or recommendation* ) OR PT practice guidelines                                                                                                                                                   | Search modes - Boolean/Phrase                                                 | 180,650 |
| S15        | (MH "Rheumatology")                                                                                                                                                                                                                    | Search modes - Boolean/Phrase                                                 | 1,693   |
| S16        | (MH "Rheumatic Diseases+")                                                                                                                                                                                                             | Search modes - Boolean/Phrase                                                 | 34,482  |
| S17        | Rheumat* OR arthrit* OR osteoarthritis*                                                                                                                                                                                                | Search modes - Boolean/Phrase                                                 | 47,018  |
| S18        | S15 OR S16 OR S17                                                                                                                                                                                                                      | Search modes - Boolean/Phrase                                                 | 52,923  |
| S19        | (MH "Patient Compliance+") OR (MH "Treatment Refusal")                                                                                                                                                                                 | Search modes - Boolean/Phrase                                                 | 32,661  |
| S20        | barrier* OR attend* OR adher* OR participat* OR attitude* OR belief* OR complian* OR noncomplan* OR nonadher* OR persist* OR refus* OR interrupt* OR dropout* OR drop out* OR "no show"                                                | Search modes - Boolean/Phrase                                                 | 482,203 |
| S21        | S19 OR S20                                                                                                                                                                                                                             | Search modes - Boolean/Phrase                                                 | 482,203 |
| S22        | (MH "Drug Therapy+")                                                                                                                                                                                                                   | Search modes - Boolean/Phrase                                                 | 95,672  |
| S23        | (MH "Prescriptions, Drug")                                                                                                                                                                                                             | Search modes - Boolean/Phrase                                                 | 5,570   |
| S24        | (MH "Antirheumatic Agents+")                                                                                                                                                                                                           | Search modes - Boolean/Phrase                                                 | 34,193  |
| S25        | Antirheumatic OR Anti Rheumatic OR NSAID* OR medication* OR prescrib* OR prescription*                                                                                                                                                 | Search modes - Boolean/Phrase                                                 | 126,943 |
| S26        | S22 OR S23 OR S24 OR S25                                                                                                                                                                                                               | Search modes - Boolean/Phrase                                                 | 219,775 |
| S27        | S18 AND S21 AND S26                                                                                                                                                                                                                    | Search modes - Boolean/Phrase                                                 | 1,238   |
| S28        | ( Guideline* or guidance or consensus or recommendation* ) OR PT practice guidelines                                                                                                                                                   | Search modes - Boolean/Phrase                                                 | 180,650 |
| S29        | ( PT (Systematic Review or Meta Analysis) ) OR ( (((systematic or method*) N3 (review* or overview* or study or studies or search* or approach*)) or meta analy* or meta-analy* or metaanaly* ) ) OR ( (pooled N1 (data or analys*)) ) | Search modes - Boolean/Phrase                                                 | 169,854 |
| S30        | S28 OR S29                                                                                                                                                                                                                             | Search modes - Boolean/Phrase                                                 | 329,145 |
| S31        | S27 AND S30                                                                                                                                                                                                                            | Search modes - Boolean/Phrase                                                 | 295     |
| S32        | S27 AND S30                                                                                                                                                                                                                            | Limiters - Published Date: 20080101-20181231<br>Search modes - Boolean/Phrase | 212     |

## Cochrane

| ID  | Search                                                                                                                                                                                      | Hits   |
|-----|---------------------------------------------------------------------------------------------------------------------------------------------------------------------------------------------|--------|
| #1  | MeSH descriptor: [Rheumatic Diseases] explode all trees                                                                                                                                     | 13904  |
| #2  | Rheumat* or arthrit* or osteoarthritis*                                                                                                                                                     | 34812  |
| #3  | #1 or #2                                                                                                                                                                                    | 35806  |
| #4  | MeSH descriptor: [Treatment Adherence and Compliance] explode all trees                                                                                                                     | 22899  |
| #5  | barrier* or attend* or adher* or participat* or attitude* or belief* or complian* or noncompliant* or nonadher* or persist* or refus* or interrupt* or dropout* or "drop out*" or "no show" | 189259 |
| #6  | #4 or #5                                                                                                                                                                                    | 196639 |
| #7  | #3 and #6                                                                                                                                                                                   | 6682   |
| #8  | MeSH descriptor: [Appointments and Schedules] explode all trees                                                                                                                             | 998    |
| #9  | MeSH descriptor: [Referral and Consultation] explode all trees                                                                                                                              | 2440   |
| #10 | MeSH descriptor: [Ambulatory Care] explode all trees                                                                                                                                        | 3903   |
| #11 | appointment* or schedule* or consultat* or visit*                                                                                                                                           | 110411 |
| #12 | #8 or #9 or #10 or #11                                                                                                                                                                      | 113796 |
| #13 | #7 and #12 Publication Year from 2008 to 2018, in Other Reviews                                                                                                                             | 790    |

## Assessment Tools

### Tools for medication adherence

| Database                                                  |                                                                                 | Hits | Date for search |
|-----------------------------------------------------------|---------------------------------------------------------------------------------|------|-----------------|
| Pubmed                                                    | Pubmed.gov                                                                      | 353  | 2018.11.14      |
| Embase                                                    | Embase.com                                                                      | 114  | 2018.11.14      |
| CINAHL                                                    | Ebsco                                                                           | 47   | 2018.11.19      |
| Cochrane                                                  | <a href="https://www.cochranelibrary.com/">https://www.cochranelibrary.com/</a> | 545  | 2018.11.19      |
| Total                                                     |                                                                                 | 1059 |                 |
| Total after duplicate search in Endnote                   |                                                                                 | 977  |                 |
| Total added to screen after duplicate search in Covidence |                                                                                 | 971  |                 |

### PubMed

| Search Query                                                                                                                                                                                                                                                                                                                                                                                                                                                                                                                                                                                                                                                                                                                                                                                                                                                                                                                                                                                                                                                                                                                                                                                                                                                                                                                                                                                                                                                                                                                                                                                                                                                                                                                                                                                                                                                                                                                                                                                                                                                                                                                                                                                                                                                                                                                                                                                                                                                                                                                                                                                                                                                                                                                                                                                                                                                                                                                                                          | Items found |
|-----------------------------------------------------------------------------------------------------------------------------------------------------------------------------------------------------------------------------------------------------------------------------------------------------------------------------------------------------------------------------------------------------------------------------------------------------------------------------------------------------------------------------------------------------------------------------------------------------------------------------------------------------------------------------------------------------------------------------------------------------------------------------------------------------------------------------------------------------------------------------------------------------------------------------------------------------------------------------------------------------------------------------------------------------------------------------------------------------------------------------------------------------------------------------------------------------------------------------------------------------------------------------------------------------------------------------------------------------------------------------------------------------------------------------------------------------------------------------------------------------------------------------------------------------------------------------------------------------------------------------------------------------------------------------------------------------------------------------------------------------------------------------------------------------------------------------------------------------------------------------------------------------------------------------------------------------------------------------------------------------------------------------------------------------------------------------------------------------------------------------------------------------------------------------------------------------------------------------------------------------------------------------------------------------------------------------------------------------------------------------------------------------------------------------------------------------------------------------------------------------------------------------------------------------------------------------------------------------------------------------------------------------------------------------------------------------------------------------------------------------------------------------------------------------------------------------------------------------------------------------------------------------------------------------------------------------------------------|-------------|
| #23 Search (((((((((((("Drug Therapy"[Mesh] OR "drug therapy"[Subheading])) OR "Antirheumatic Agents"[Mesh] OR (Antirheumatic[tiab] OR Anti Rheumatic[tiab])) OR NSAID*[Title/Abstract]) OR "Drug Prescriptions"[Mesh] OR ((medication*[Text Word] OR prescrib*[Text Word] OR prescription*[Text Word]))) AND ("Rheumatic Diseases"[Mesh] OR "Rheumatology"[Mesh] OR Rheumat*[Title/Abstract] OR arthrit*[Title/Abstract] OR osteoarthrit*[Title/Abstract])) AND (((barrier*[Title/Abstract] OR attend*[Title/Abstract] OR adher*[Title/Abstract] OR participat*[Title/Abstract] OR attitude*[Title/Abstract] OR belief*[Title/Abstract] OR complian*[Title/Abstract] OR noncomplian*[Title/Abstract] OR nonadher*[Title/Abstract] OR persist*[Title/Abstract] OR refus*[Title/Abstract] OR interrupt*[Title/Abstract] OR dropout*[Title/Abstract] OR drop out*[Title/Abstract] OR "no show"[Title/Abstract])) OR ("Treatment Adherence and Compliance"[Mesh])) AND (((((((((((((((((((patient recall*[Title/Abstract] OR patients recall*[Title/Abstract])) OR ("patient diary"[Title/Abstract] OR "patients diary"[Title/Abstract] OR "patients diary"[Title/Abstract] OR "patients diaries"[Title/Abstract])) OR self report*[tiab]) OR continuous multiple interval measure*[tiab]) OR ((continuous measure*[tiab] OR "continuous multiple interval measure"[tiab])) OR "medication gaps"[tiab]) OR "medication gap"[tiab]) OR prescriptions refill*[tiab]) OR prescription refill*[tiab]) OR medications refill*[tiab]) OR medication refill*[tiab]) OR pills Counts[tiab]) OR pills Count[tiab]) OR pill Count[tiab]) OR pill Counts[tiab]) OR medications Counts[tiab]) OR medication count*[tiab]) OR "Proportion of days covered"[tiab]) OR ((complian*[Title/Abstract] OR adhere*[Title/Abstract] OR persist*[Title/Abstract] OR possession*[Title/Abstract]) AND (design[Title/Abstract] OR designs[Title/Abstract] OR method[Title/Abstract] OR methods[Title/Abstract] OR methodology[Title/Abstract] OR measure[Title/Abstract] OR measures[Title/Abstract] OR measurement[Title/Abstract] OR measurements[Title/Abstract] OR calculate[Title/Abstract] OR calculated[Title/Abstract] OR calculating[Title/Abstract] OR calculation*[Title/Abstract] OR questionnaire*[Title/Abstract] OR rate[Title/Abstract] OR rating[Title/Abstract] OR ratio*[Title/Abstract] OR assessment*[Title/Abstract] OR scale*[Title/Abstract])) OR (prescription record*[Title/Abstract] OR prescriptions record*[Title/Abstract])) OR (medication*[tiab] AND possession ratio*[tiab])) AND (((((((Guideline*[Text Word] OR practice guideline*[Text Word] OR clinical guideline*[Text Word] OR guidance[Text Word] OR consensus[Text Word] OR recommendation[Text Word])) OR ("Guidelines as Topic"[Mesh:noexp]) OR "Practice Guidelines as Topic"[Mesh])) OR "Guideline"[Publication Type])) OR systematic[sb]) Filters: Publication date from 2008/01/01 to 2018/12/31 | 353         |

### Embase

| No. | Query                                                                                                                              | Results |
|-----|------------------------------------------------------------------------------------------------------------------------------------|---------|
| #1  | 'medication* possession ratio':ti,ab,kw                                                                                            | 2323    |
| #2  | 'medication possession ratio'/exp                                                                                                  | 86      |
| #3  | 'prescription* record':ti,ab,kw                                                                                                    | 803     |
| #4  | 'proportion of days covered'/exp                                                                                                   | 16      |
| #5  | 'proportion of days covered':ti,ab,kw                                                                                              | 1481    |
| #6  | 'medication* count':ti,ab,kw OR 'pill count':ti,ab,kw OR 'pills count':ti,ab,kw OR 'drug count':ti,ab,kw OR 'drugs count':ti,ab,kw | 1811    |

| No. | Query                                                                                                                                                                                                                                                                                                                                                                                                                                                                               | Results  |
|-----|-------------------------------------------------------------------------------------------------------------------------------------------------------------------------------------------------------------------------------------------------------------------------------------------------------------------------------------------------------------------------------------------------------------------------------------------------------------------------------------|----------|
| #7  | 'medication* gap':ti,ab,kw OR 'medication* gaps':ti,ab,kw                                                                                                                                                                                                                                                                                                                                                                                                                           | 117      |
| #8  | 'continuous multiple interval measure* of medication* availability':ti,ab,kw                                                                                                                                                                                                                                                                                                                                                                                                        | 9        |
| #9  | 'medication* refill':ti,ab,kw OR 'prescription* refill':ti,ab,kw                                                                                                                                                                                                                                                                                                                                                                                                                    | 1106     |
| #10 | 'medication* event* monitoring system*':ti,ab,kw                                                                                                                                                                                                                                                                                                                                                                                                                                    | 531      |
| #11 | 'medication adherence monitoring system'/exp OR 'medication adherence monitor*':ti,ab,kw                                                                                                                                                                                                                                                                                                                                                                                            | 143      |
| #12 | 'morisky scale*':ti,ab,kw OR mmas:ti,ab,kw                                                                                                                                                                                                                                                                                                                                                                                                                                          | 1371     |
| #13 | 'medication adherence self efficacy scale*':ti,ab,kw OR mases:ti,ab,kw                                                                                                                                                                                                                                                                                                                                                                                                              | 294      |
| #14 | 'daily patient* possession ratio*':ti,ab,kw OR dppr:ti,ab,kw                                                                                                                                                                                                                                                                                                                                                                                                                        | 21       |
| #15 | ((('self report*' OR 'patient* diary' OR 'patient* diaries' OR 'patient* recall*') NEAR/3 (complan* OR adhere* OR persist*)):ti,ab,kw ((complan* OR adhere* OR persist* OR possession*) NEAR/3 (design OR designs OR method OR methods OR methodology OR measure OR measures OR measurement OR measurements OR calculate OR calculated OR calculating OR calculation* OR questionnaire* OR rate OR rating OR assess* OR ratio* OR scale* OR instrument* OR tool OR tools)):ti,ab,kw | 3483     |
| #16 | #1 OR #2 OR #3 OR #4 OR #5 OR #6 OR #7 OR #8 OR #9 OR #10 OR #11 OR #12 OR #13                                                                                                                                                                                                                                                                                                                                                                                                      | 55049    |
| #17 | OR #14 OR #15 OR #16                                                                                                                                                                                                                                                                                                                                                                                                                                                                | 60828    |
| #18 | 'rheumatic disease'/exp                                                                                                                                                                                                                                                                                                                                                                                                                                                             | 243800   |
| #19 | 'rheumatology'/exp                                                                                                                                                                                                                                                                                                                                                                                                                                                                  | 56468    |
| #20 | rheumat*:ti,ab OR arthrit*:ti,ab OR osteoarthritis*:ti,ab                                                                                                                                                                                                                                                                                                                                                                                                                           | 386252   |
| #21 | #18 OR #19 OR #20                                                                                                                                                                                                                                                                                                                                                                                                                                                                   | 454910   |
| #22 | 'patient attitude'/exp barrier*:ti,ab OR attend*:ti,ab OR adher*:ti,ab OR participat*:ti,ab OR attitude*:ti,ab OR belief*:ti,ab OR complian*:ti,ab OR noncomplan*:ti,ab OR nonadher*:ti,ab OR persist*:ti,ab OR refus*:ti,ab OR interrupt*:ti,ab OR dropout*:ti,ab OR 'drop out*':ti,ab OR 'no show':ti,ab                                                                                                                                                                          | 347359   |
| #23 | #22 OR #23                                                                                                                                                                                                                                                                                                                                                                                                                                                                          | 2215780  |
| #24 | 'drug therapy'/exp                                                                                                                                                                                                                                                                                                                                                                                                                                                                  | 2421833  |
| #25 | 'drug therapy'/lnk                                                                                                                                                                                                                                                                                                                                                                                                                                                                  | 2411127  |
| #26 | 'antirheumatic agent'/exp                                                                                                                                                                                                                                                                                                                                                                                                                                                           | 3581573  |
| #27 | 'prescription'/exp antirheumatic:ti,ab OR 'anti rheumatic':ti,ab OR nsaid*:ti,ab OR medication*:ti,ab OR prescrib*:ti,ab OR prescription*:ti,ab                                                                                                                                                                                                                                                                                                                                     | 554502   |
| #28 | #25 OR #26 OR #27 OR #28 OR #29                                                                                                                                                                                                                                                                                                                                                                                                                                                     | 162993   |
| #29 | #21 AND #24 AND #30 guideline*:ti,ab,de OR 'practice guideline*':ti,ab,de OR 'clinical guideline*':ti,ab,de OR guidance:ti,ab,de OR consensus:ti,ab,de OR recommendation*:ti,ab,de ((systematic OR method*) NEAR/3 (review* OR overview* OR study OR studies OR search* OR approach*)):ti,ab,de                                                                                                                                                                                     | 691289   |
| #30 | #32 OR #36                                                                                                                                                                                                                                                                                                                                                                                                                                                                          | 5488394  |
| #31 | 'meta analy*':ti,ab,de OR 'meta-analy*':ti,ab,de OR metaanaly*:ti,ab,de                                                                                                                                                                                                                                                                                                                                                                                                             | 19728    |
| #32 | 'systematic review'/exp OR 'meta analysis'/exp                                                                                                                                                                                                                                                                                                                                                                                                                                      | 1093831  |
| #33 | #33 OR #34 OR #35                                                                                                                                                                                                                                                                                                                                                                                                                                                                   | 1245133  |
| #34 | #32 OR #36                                                                                                                                                                                                                                                                                                                                                                                                                                                                          | 227900   |
| #35 | #31 AND #37                                                                                                                                                                                                                                                                                                                                                                                                                                                                         | 245463   |
| #36 | 'conference abstract'/it                                                                                                                                                                                                                                                                                                                                                                                                                                                            | 1358280  |
| #37 | #38 NOT #39                                                                                                                                                                                                                                                                                                                                                                                                                                                                         | 2327838  |
| #38 | [2008-2018]/py                                                                                                                                                                                                                                                                                                                                                                                                                                                                      | 4209     |
| #39 | #38 AND #41                                                                                                                                                                                                                                                                                                                                                                                                                                                                         | 3034012  |
| #40 | #40 AND #41                                                                                                                                                                                                                                                                                                                                                                                                                                                                         | 2169     |
| #41 | #17 AND #42                                                                                                                                                                                                                                                                                                                                                                                                                                                                         | 13488242 |
| #42 |                                                                                                                                                                                                                                                                                                                                                                                                                                                                                     | 1634     |
| #43 |                                                                                                                                                                                                                                                                                                                                                                                                                                                                                     | 114      |

**CINAHL**

| Search ID# | Search Terms                                                                                                                                                                                                                                                                                                                      | Search Options                | Results |
|------------|-----------------------------------------------------------------------------------------------------------------------------------------------------------------------------------------------------------------------------------------------------------------------------------------------------------------------------------|-------------------------------|---------|
| S1         | (MH "Rheumatology")                                                                                                                                                                                                                                                                                                               | Search modes - Boolean/Phrase | 2,427   |
| S2         | (MH "Rheumatic Diseases+")                                                                                                                                                                                                                                                                                                        | Search modes - Boolean/Phrase | 56,764  |
| S3         | Rheumat* OR arthrit* OR osteoarthritis*                                                                                                                                                                                                                                                                                           | Search modes - Boolean/Phrase | 81,696  |
| S4         | S1 OR S2 OR S3                                                                                                                                                                                                                                                                                                                    | Search modes - Boolean/Phrase | 91,196  |
| S5         | (MH "Patient Compliance+") OR (MH "Treatment Refusal")                                                                                                                                                                                                                                                                            | Search modes - Boolean/Phrase | 46,077  |
| S6         | barrier* OR attend* OR adher* OR participat* OR attitude* OR belief* OR complian* OR noncomplian* OR nonadher* OR persist* OR refus* OR interrupt* OR dropout* OR drop out* OR "no show"                                                                                                                                          | Search modes - Boolean/Phrase | 692,441 |
| S7         | S5 OR S6                                                                                                                                                                                                                                                                                                                          | Search modes - Boolean/Phrase | 692,441 |
| S8         | (MH "Drug Therapy+")                                                                                                                                                                                                                                                                                                              | Search modes - Boolean/Phrase | 144,677 |
| S9         | (MH "Prescriptions, Drug")                                                                                                                                                                                                                                                                                                        | Search modes - Boolean/Phrase | 9,379   |
| S10        | (MH "Antirheumatic Agents+")                                                                                                                                                                                                                                                                                                      | Search modes - Boolean/Phrase | 55,594  |
| S11        | Antirheumatic OR Anti Rheumatic OR NSAID* OR medication* OR prescrib* OR prescription*                                                                                                                                                                                                                                            | Search modes - Boolean/Phrase | 192,312 |
| S12        | S8 OR S9 OR S10 OR S11                                                                                                                                                                                                                                                                                                            | Search modes - Boolean/Phrase | 336,897 |
| S13        | S4 AND S7 AND S12                                                                                                                                                                                                                                                                                                                 | Search modes - Boolean/Phrase | 2,079   |
| S14        | ( Guideline* or guidance or consensus or recommendation* ) OR PT practice guidelines                                                                                                                                                                                                                                              | Search modes - Boolean/Phrase | 272,535 |
| S15        | ( PT (Systematic Review or Meta Analysis) ) OR ( (((systematic or method*) N3 (review* or overview* or study or studies or search* or approach*)) or meta analy* or meta-analy* or metaanaly* ) ) OR ( (pooled N1 (data or analys*)) ) )                                                                                          | Search modes - Boolean/Phrase | 279,004 |
| S16        | S14 OR S15                                                                                                                                                                                                                                                                                                                        | Search modes - Boolean/Phrase | 517,009 |
| S17        | S13 AND S16                                                                                                                                                                                                                                                                                                                       | Search modes - Boolean/Phrase | 523     |
| S18        | medication possession ratio*                                                                                                                                                                                                                                                                                                      | Search modes - Boolean/Phrase | 464     |
| S19        | proportion of days covered                                                                                                                                                                                                                                                                                                        | Search modes - Boolean/Phrase | 279     |
| S20        | medication* gap*                                                                                                                                                                                                                                                                                                                  | Search modes - Boolean/Phrase | 31      |
| S21        | medication* count* OR pill count* OR pills count* OR drug count* OR drugs count*                                                                                                                                                                                                                                                  | Search modes - Boolean/Phrase | 393     |
| S22        | continuous multiple interval measure* of medication*                                                                                                                                                                                                                                                                              | Search modes - Boolean/Phrase | 5       |
| S23        | medication* refill* OR prescription* refill*                                                                                                                                                                                                                                                                                      | Search modes - Boolean/Phrase | 296     |
| S24        | medication* event* monitor*                                                                                                                                                                                                                                                                                                       | Search modes - Boolean/Phrase | 143     |
| S25        | medication adherence monitor*                                                                                                                                                                                                                                                                                                     | Search modes - Boolean/Phrase | 13      |
| S26        | morisky scale* OR mmas                                                                                                                                                                                                                                                                                                            | Search modes - Boolean/Phrase | 586     |
| S27        | medication adherence self efficacy scale OR mases                                                                                                                                                                                                                                                                                 | Search modes - Boolean/Phrase | 50      |
| S28        | daily patient* possession ratio*                                                                                                                                                                                                                                                                                                  | Search modes - Boolean/Phrase | 0       |
| S29        | patient* possession ratio* OR dppr                                                                                                                                                                                                                                                                                                | Search modes - Boolean/Phrase | 1       |
| S30        | ((self report* OR patient* diaries OR patient* diary OR patient* recall*) N3 (complian* OR adhere* OR persist*))                                                                                                                                                                                                                  | Search modes - Boolean/Phrase | 1,208   |
| S31        | ((complian* OR adhere* OR persist* OR possession*) N3 (design OR designs OR method OR methods OR methodology OR measure OR measures OR measurement OR measurements OR calculate OR calculated OR calculating OR calculation* OR questionnaire* OR rate OR rating OR assess* OR ratio* OR scale* OR instrument* OR tool OR tools)) | Search modes - Boolean/Phrase | 15,435  |

|     |                                                                                                      |                                                                                  |        |
|-----|------------------------------------------------------------------------------------------------------|----------------------------------------------------------------------------------|--------|
| S32 | S18 OR S19 OR S20 OR S21 OR S22 OR S23 OR S24<br>OR S25 OR S26 OR S27 OR S28 OR S29 OR S30 OR<br>S31 | Search modes - Boolean/Phrase                                                    | 17,110 |
| S33 | S17 AND S32                                                                                          | Search modes - Boolean/Phrase                                                    | 53     |
| S34 | S17 AND S32                                                                                          | Limiters - Published Date:<br>20080101-20181231<br>Search modes - Boolean/Phrase | 47     |

## Cochrane Library

| ID  | Search                                                                                                                                                                                                                                                                                                                                             | Hits   |
|-----|----------------------------------------------------------------------------------------------------------------------------------------------------------------------------------------------------------------------------------------------------------------------------------------------------------------------------------------------------|--------|
| #1  | MeSH descriptor: [Rheumatic Diseases] explode all trees                                                                                                                                                                                                                                                                                            | 12896  |
| #2  | Rheumat* or arthrit* or osteoarthritis*                                                                                                                                                                                                                                                                                                            | 33240  |
| #3  | #1 or #2                                                                                                                                                                                                                                                                                                                                           | 34137  |
| #4  | MeSH descriptor: [Treatment Adherence and Compliance] explode all trees                                                                                                                                                                                                                                                                            | 24506  |
| #5  | barrier* or attend* or adher* or participat* or attitude* or belief* or complian* or noncompliant*<br>or nonadher* or persist* or refus* or interrupt* or dropout* or drop out* or "no show"                                                                                                                                                       | 190621 |
| #6  | #4 or #5                                                                                                                                                                                                                                                                                                                                           | 198381 |
| #7  | #3 and #6                                                                                                                                                                                                                                                                                                                                          | 6600   |
| #8  | MeSH descriptor: [Drug Therapy] explode all trees                                                                                                                                                                                                                                                                                                  | 132281 |
| #9  | Antirheumatic or Anti Rheumatic or NSAID* or medication* or prescrib* or prescription*                                                                                                                                                                                                                                                             | 92674  |
| #10 | MeSH descriptor: [Antirheumatic Agents] explode all trees                                                                                                                                                                                                                                                                                          | 9208   |
| #11 | #8 OR #9 OR #10                                                                                                                                                                                                                                                                                                                                    | 213099 |
| #12 | #7 AND #11                                                                                                                                                                                                                                                                                                                                         | 2829   |
| #13 | medication possession ratio*                                                                                                                                                                                                                                                                                                                       | 176    |
| #14 | "proportion of days covered"                                                                                                                                                                                                                                                                                                                       | 62     |
| #15 | medication gap*                                                                                                                                                                                                                                                                                                                                    | 888    |
| #16 | (medication* count*) OR (pill count*) OR (pills count*) OR (drug count*) OR (drugs count*)                                                                                                                                                                                                                                                         | 42068  |
| #17 | continuous multiple interval measure*                                                                                                                                                                                                                                                                                                              | 4411   |
| #18 | (medication* refill*) OR (prescription* refill*)                                                                                                                                                                                                                                                                                                   | 424    |
| #19 | medication event* monitor*                                                                                                                                                                                                                                                                                                                         | 2881   |
| #20 | medication adherence monitor*                                                                                                                                                                                                                                                                                                                      | 1867   |
| #21 | (morisky scale*) OR mmas                                                                                                                                                                                                                                                                                                                           | 300    |
| #22 | (medication adherence self efficacy scale) OR mases                                                                                                                                                                                                                                                                                                | 715    |
| #23 | (patient* possession ratio*) OR (dppr)                                                                                                                                                                                                                                                                                                             | 190    |
| #24 | ((self report*) OR (patient* diaries) OR (patient* diary) OR (patient* recall*)) NEAR/3<br>(compliant* OR adhere* OR persist*)                                                                                                                                                                                                                     | 27349  |
| #25 | ((compliant* OR adhere* OR persist* OR possession*) NEAR/3 (design OR designs OR<br>method OR methods OR methodology OR measure OR measures OR measurement OR<br>measurements OR calculate OR calculated OR calculating OR calculation* OR<br>questionnaire* OR rate OR rating OR assess* OR ratio* OR scale* OR instrument* OR tool<br>OR tools)) | 11054  |
| #26 | #25 OR #24 OR #23 OR #22 OR #21 OR #20 OR #19 OR #18 OR #17 OR #16 OR #15 OR<br>#14 OR #13                                                                                                                                                                                                                                                         | 73871  |
| #27 | #12 AND #26 with Cochrane Library publication date Between Jan 2008 and Nov 2018, in<br>Cochrane Reviews                                                                                                                                                                                                                                           | 545    |

## Tools for adherence to exercise

| Database                                                  |            | Hits | Date for search |
|-----------------------------------------------------------|------------|------|-----------------|
| Pubmed                                                    | Pubmed.gov | 139  | 2018.11.20      |
| Embase                                                    | Embase.com | 87   | 2018.11.21      |
| CINAHL                                                    | Ebsco      | 66   | 2018.11.21      |
| Cochrane                                                  |            | 186  | 2018.11.21      |
| Total                                                     |            | 478  |                 |
| Total after duplicate search in Endnote                   |            | 412  |                 |
| Total added to screen after duplicate search in Covidence |            | 208  |                 |

### Pubmed

| Search | Query                                                                                                                                                                                                                                                                                                                                                                                                                                                                                                                                                                                                                                                                                                                                                                                                                                                                                                                                                                                                                                                                                                                                                                                                                                                                                                                                                                                                                                                                                                                                                                                                                                                                                                                                                                                                                                                                                                    | Items found             |
|--------|----------------------------------------------------------------------------------------------------------------------------------------------------------------------------------------------------------------------------------------------------------------------------------------------------------------------------------------------------------------------------------------------------------------------------------------------------------------------------------------------------------------------------------------------------------------------------------------------------------------------------------------------------------------------------------------------------------------------------------------------------------------------------------------------------------------------------------------------------------------------------------------------------------------------------------------------------------------------------------------------------------------------------------------------------------------------------------------------------------------------------------------------------------------------------------------------------------------------------------------------------------------------------------------------------------------------------------------------------------------------------------------------------------------------------------------------------------------------------------------------------------------------------------------------------------------------------------------------------------------------------------------------------------------------------------------------------------------------------------------------------------------------------------------------------------------------------------------------------------------------------------------------------------|-------------------------|
| #13    | Search (adherence to exercise scale for older patient*[Title/Abstract] OR aesop[Title/Abstract])                                                                                                                                                                                                                                                                                                                                                                                                                                                                                                                                                                                                                                                                                                                                                                                                                                                                                                                                                                                                                                                                                                                                                                                                                                                                                                                                                                                                                                                                                                                                                                                                                                                                                                                                                                                                         | <a href="#">197</a>     |
| #14    | Search (((((((design[Title/Abstract] OR designs[Title/Abstract] OR method[Title/Abstract] OR methods[Title/Abstract] OR methodology[Title/Abstract] OR measure[Title/Abstract] OR measures[Title/Abstract] OR measurement[Title/Abstract] OR measurements[Title/Abstract] OR calculate[Title/Abstract] OR calculated[Title/Abstract] OR calculating[Title/Abstract] OR calculation*[Title/Abstract] OR questionnaire*[Title/Abstract] OR rate[Title/Abstract] OR rating[Title/Abstract] OR ratio*[Title/Abstract] OR assessment*[Title/Abstract])) AND (complan*[Title/Abstract] OR adhere*[Title/Abstract] OR persist*[Title/Abstract] OR possession*[Title/Abstract])) OR (((self report*[Title/Abstract] OR patient diary[Title/Abstract] OR patient diaries[Title/Abstract] OR patient recall[Title/Abstract] OR patients diaries[Title/Abstract])) AND (complan*[Title/Abstract] OR adhere*[Title/Abstract] OR persist*[Title/Abstract] OR possession*[Title/Abstract])) OR ((daily patient possession ratio*[Title/Abstract] OR daily patients possession ration*[Title/Abstract])) OR ((adherence self report questionnaire*[Title/Abstract] OR asrq[Title/Abstract])) OR ((adherence to exercise scale for older patient*[Title/Abstract] OR aesop[Title/Abstract]))                                                                                                                                                                                                                                                                                                                                                                                                                                                                                                                                                                                                                             | <a href="#">353258</a>  |
| #15    | Search "Rheumatic Diseases"[Mesh] OR "Rheumatology"[Mesh] OR Rheumat*[Title/Abstract] OR arthrit*[Title/Abstract] OR osteoarthritis*[Title/Abstract]                                                                                                                                                                                                                                                                                                                                                                                                                                                                                                                                                                                                                                                                                                                                                                                                                                                                                                                                                                                                                                                                                                                                                                                                                                                                                                                                                                                                                                                                                                                                                                                                                                                                                                                                                     | <a href="#">340379</a>  |
| #16    | Search ((barrier*[Title/Abstract] OR attend*[Title/Abstract] OR adher*[Title/Abstract] OR participat*[Title/Abstract] OR attitude*[Title/Abstract] OR belief*[Title/Abstract] OR complian*[Title/Abstract] OR noncomplian*[Title/Abstract] OR nonadher*[Title/Abstract] OR persist*[Title/Abstract] OR refus*[Title/Abstract] OR interrupt*[Title/Abstract] OR dropout*[Title/Abstract] OR drop out*[Title/Abstract] OR "no show"[Title/Abstract])) OR ("Treatment Adherence and Compliance"[Mesh])                                                                                                                                                                                                                                                                                                                                                                                                                                                                                                                                                                                                                                                                                                                                                                                                                                                                                                                                                                                                                                                                                                                                                                                                                                                                                                                                                                                                      | <a href="#">1873554</a> |
| #17    | Search (((("Exercise Therapy"[Mesh] OR "Sports"[Mesh] OR "Exercise"[Mesh] OR "Exercise Movement Techniques"[Mesh])) OR ((kinesiotherap*[Title/Abstract] OR exercis*[Title/Abstract] OR motion*[Title/Abstract] OR train*[Title/Abstract] OR sport*[Title/Abstract] OR fitness[Title/Abstract]))                                                                                                                                                                                                                                                                                                                                                                                                                                                                                                                                                                                                                                                                                                                                                                                                                                                                                                                                                                                                                                                                                                                                                                                                                                                                                                                                                                                                                                                                                                                                                                                                          | <a href="#">1065476</a> |
| #18    | Search (((((((("Exercise Therapy"[Mesh] OR "Sports"[Mesh] OR "Exercise"[Mesh] OR "Exercise Movement Techniques"[Mesh])) OR ((kinesiotherap*[Title/Abstract] OR exercis*[Title/Abstract] OR motion*[Title/Abstract] OR train*[Title/Abstract] OR sport*[Title/Abstract] OR fitness[Title/Abstract])) AND (((barrier*[Title/Abstract] OR attend*[Title/Abstract] OR adher*[Title/Abstract] OR participat*[Title/Abstract] OR attitude*[Title/Abstract] OR belief*[Title/Abstract] OR complian*[Title/Abstract] OR noncomplian*[Title/Abstract] OR nonadher*[Title/Abstract] OR persist*[Title/Abstract] OR refus*[Title/Abstract] OR interrupt*[Title/Abstract] OR dropout*[Title/Abstract] OR drop out*[Title/Abstract] OR "no show"[Title/Abstract])) OR ("Treatment Adherence and Compliance"[Mesh])) AND ("Rheumatic Diseases"[Mesh] OR "Rheumatology"[Mesh] OR Rheumat*[Title/Abstract] OR arthrit*[Title/Abstract] OR osteoarthritis*[Title/Abstract])) AND (((((((design[Title/Abstract] OR designs[Title/Abstract] OR method[Title/Abstract] OR methods[Title/Abstract] OR methodology[Title/Abstract] OR measure[Title/Abstract] OR measures[Title/Abstract] OR measurement[Title/Abstract] OR measurements[Title/Abstract] OR calculate[Title/Abstract] OR calculated[Title/Abstract] OR calculating[Title/Abstract] OR calculation*[Title/Abstract] OR questionnaire*[Title/Abstract] OR rate[Title/Abstract] OR rating[Title/Abstract] OR ratio*[Title/Abstract] OR assessment*[Title/Abstract])) AND (complan*[Title/Abstract] OR adhere*[Title/Abstract] OR persist*[Title/Abstract] OR possession*[Title/Abstract])) OR (((self report*[Title/Abstract] OR patient diary[Title/Abstract] OR patient diaries[Title/Abstract] OR patient recall[Title/Abstract] OR patients diaries[Title/Abstract])) AND (complan*[Title/Abstract] OR adhere*[Title/Abstract] OR persist*[Title/Abstract] OR | <a href="#">904</a>     |

| Search | Query                                                                                                                                                                                                                                                                                                                                                                                                                                                                                                                                                                                                                                                                                                                                                                                                                                                                                                                                                                                                                                                                                                                                                                                                                                                                                                                                                                                                                                                                                                                                                                                                                                                                                                                                                                                                                                                                                                                                                                                                                                                                                                                                                                                                                                                                                                                                                                                                                                                                                                                                                                 | Items found            |
|--------|-----------------------------------------------------------------------------------------------------------------------------------------------------------------------------------------------------------------------------------------------------------------------------------------------------------------------------------------------------------------------------------------------------------------------------------------------------------------------------------------------------------------------------------------------------------------------------------------------------------------------------------------------------------------------------------------------------------------------------------------------------------------------------------------------------------------------------------------------------------------------------------------------------------------------------------------------------------------------------------------------------------------------------------------------------------------------------------------------------------------------------------------------------------------------------------------------------------------------------------------------------------------------------------------------------------------------------------------------------------------------------------------------------------------------------------------------------------------------------------------------------------------------------------------------------------------------------------------------------------------------------------------------------------------------------------------------------------------------------------------------------------------------------------------------------------------------------------------------------------------------------------------------------------------------------------------------------------------------------------------------------------------------------------------------------------------------------------------------------------------------------------------------------------------------------------------------------------------------------------------------------------------------------------------------------------------------------------------------------------------------------------------------------------------------------------------------------------------------------------------------------------------------------------------------------------------------|------------------------|
|        | possession*[Title/Abstract])) OR ((daily patient possession ratio*[Title/Abstract] OR daily patients possession ration*[Title/Abstract])) OR ((adherence self report questionnaire*[Title/Abstract]) OR asrq[Title/Abstract])) OR ((adherence to exercise scale for older patient*[Title/Abstract] OR aesop[Title/Abstract]))                                                                                                                                                                                                                                                                                                                                                                                                                                                                                                                                                                                                                                                                                                                                                                                                                                                                                                                                                                                                                                                                                                                                                                                                                                                                                                                                                                                                                                                                                                                                                                                                                                                                                                                                                                                                                                                                                                                                                                                                                                                                                                                                                                                                                                         |                        |
| #19    | Search (((((Guideline*[Text Word] OR practice guideline*[Text Word] OR clinical guideline*[Text Word] OR guidance[Text Word] OR consensus[Text Word] OR recommendation[Text Word]))) OR ("Guidelines as Topic"[Mesh:noexp]) OR "Practice Guidelines as Topic"[Mesh])) OR "Guideline"[Publication Type])                                                                                                                                                                                                                                                                                                                                                                                                                                                                                                                                                                                                                                                                                                                                                                                                                                                                                                                                                                                                                                                                                                                                                                                                                                                                                                                                                                                                                                                                                                                                                                                                                                                                                                                                                                                                                                                                                                                                                                                                                                                                                                                                                                                                                                                               | <a href="#">650365</a> |
| #2     | Search complian*[Title/Abstract] OR adhere*[Title/Abstract] OR persist*[Title/Abstract] OR possession*[Title/Abstract]                                                                                                                                                                                                                                                                                                                                                                                                                                                                                                                                                                                                                                                                                                                                                                                                                                                                                                                                                                                                                                                                                                                                                                                                                                                                                                                                                                                                                                                                                                                                                                                                                                                                                                                                                                                                                                                                                                                                                                                                                                                                                                                                                                                                                                                                                                                                                                                                                                                | <a href="#">699239</a> |
| #20    | Search systematic[sb]                                                                                                                                                                                                                                                                                                                                                                                                                                                                                                                                                                                                                                                                                                                                                                                                                                                                                                                                                                                                                                                                                                                                                                                                                                                                                                                                                                                                                                                                                                                                                                                                                                                                                                                                                                                                                                                                                                                                                                                                                                                                                                                                                                                                                                                                                                                                                                                                                                                                                                                                                 | <a href="#">384041</a> |
| #21    | Search ((((((Guideline*[Text Word] OR practice guideline*[Text Word] OR clinical guideline*[Text Word] OR guidance[Text Word] OR consensus[Text Word] OR recommendation[Text Word]))) OR ("Guidelines as Topic"[Mesh:noexp]) OR "Practice Guidelines as Topic"[Mesh])) OR "Guideline"[Publication Type])) OR systematic[sb]                                                                                                                                                                                                                                                                                                                                                                                                                                                                                                                                                                                                                                                                                                                                                                                                                                                                                                                                                                                                                                                                                                                                                                                                                                                                                                                                                                                                                                                                                                                                                                                                                                                                                                                                                                                                                                                                                                                                                                                                                                                                                                                                                                                                                                           | <a href="#">946593</a> |
| #22    | Search (((((((("Exercise Therapy"[Mesh]) OR "Sports"[Mesh]) OR "Exercise"[Mesh]) OR "Exercise Movement Techniques"[Mesh])) OR ((kinesiotherap*[Title/Abstract] OR exercis*[Title/Abstract] OR motion*[Title/Abstract] OR train*[Title/Abstract] OR sport*[Title/Abstract] OR fitness[Title/Abstract]))) AND (((barrier*[Title/Abstract] OR attend*[Title/Abstract] OR adher*[Title/Abstract] OR participat*[Title/Abstract] OR attitude*[Title/Abstract] OR belief*[Title/Abstract] OR complian*[Title/Abstract] OR noncomplian*[Title/Abstract] OR nonadher*[Title/Abstract] OR persist*[Title/Abstract] OR refus*[Title/Abstract] OR interrupt*[Title/Abstract] OR dropout*[Title/Abstract] OR drop out*[Title/Abstract] OR "no show"[Title/Abstract])) OR ("Treatment Adherence and Compliance"[Mesh])) AND ("Rheumatic Diseases"[Mesh] OR "Rheumatology"[Mesh] OR Rheumat*[Title/Abstract] OR arthrit*[Title/Abstract] OR osteoarthrit*[Title/Abstract])) AND (((((((design[Title/Abstract] OR designs[Title/Abstract] OR method[Title/Abstract] OR methods[Title/Abstract] OR methodology[Title/Abstract] OR measure[Title/Abstract] OR measures[Title/Abstract] OR measurement[Title/Abstract] OR measurements[Title/Abstract] OR calculate[Title/Abstract] OR calculated[Title/Abstract] OR calculating[Title/Abstract] OR calculation*[Title/Abstract] OR questionnaire*[Title/Abstract] OR rate[Title/Abstract] OR rating[Title/Abstract] OR ratio*[Title/Abstract] OR assessment*[Title/Abstract])) AND (complian*[Title/Abstract] OR adhere*[Title/Abstract] OR persist*[Title/Abstract] OR possession*[Title/Abstract])) OR (((self report*[Title/Abstract] OR patient diary[Title/Abstract] OR patient diaries[Title/Abstract] OR patient recall[Title/Abstract] OR patients diaries[Title/Abstract])) AND (complian*[Title/Abstract] OR adhere*[Title/Abstract] OR persist*[Title/Abstract] OR possession*[Title/Abstract])) OR ((daily patient possession ratio*[Title/Abstract] OR daily patients possession ration*[Title/Abstract])) OR ((adherence self report questionnaire*[Title/Abstract] OR asrq[Title/Abstract])) OR ((adherence to exercise scale for older patient*[Title/Abstract] OR aesop[Title/Abstract])))) AND ((((((Guideline*[Text Word] OR practice guideline*[Text Word] OR clinical guideline*[Text Word] OR guidance[Text Word] OR consensus[Text Word] OR recommendation[Text Word]))) OR ("Guidelines as Topic"[Mesh:noexp]) OR "Practice Guidelines as Topic"[Mesh])) OR "Guideline"[Publication Type])) OR systematic[sb]) | <a href="#">173</a>    |
| #23    | Search (((((((("Exercise Therapy"[Mesh]) OR "Sports"[Mesh]) OR "Exercise"[Mesh]) OR "Exercise Movement Techniques"[Mesh])) OR ((kinesiotherap*[Title/Abstract] OR exercis*[Title/Abstract] OR motion*[Title/Abstract] OR train*[Title/Abstract] OR sport*[Title/Abstract] OR fitness[Title/Abstract]))) AND (((barrier*[Title/Abstract] OR attend*[Title/Abstract] OR adher*[Title/Abstract] OR participat*[Title/Abstract] OR attitude*[Title/Abstract] OR belief*[Title/Abstract] OR complian*[Title/Abstract] OR noncomplian*[Title/Abstract] OR nonadher*[Title/Abstract] OR persist*[Title/Abstract] OR refus*[Title/Abstract] OR interrupt*[Title/Abstract] OR dropout*[Title/Abstract] OR drop out*[Title/Abstract] OR "no show"[Title/Abstract])) OR ("Treatment Adherence and Compliance"[Mesh])) AND ("Rheumatic Diseases"[Mesh] OR "Rheumatology"[Mesh] OR Rheumat*[Title/Abstract] OR arthrit*[Title/Abstract] OR osteoarthrit*[Title/Abstract])) AND (((((((design[Title/Abstract] OR designs[Title/Abstract] OR method[Title/Abstract] OR methods[Title/Abstract] OR methodology[Title/Abstract] OR measure[Title/Abstract] OR measures[Title/Abstract] OR measurement[Title/Abstract] OR measurements[Title/Abstract] OR calculate[Title/Abstract] OR calculated[Title/Abstract] OR calculating[Title/Abstract] OR calculation*[Title/Abstract] OR questionnaire*[Title/Abstract] OR rate[Title/Abstract] OR rating[Title/Abstract] OR ratio*[Title/Abstract] OR assessment*[Title/Abstract])) AND                                                                                                                                                                                                                                                                                                                                                                                                                                                                                                                                                                                                                                                                                                                                                                                                                                                                                                                                                                                                                                                     | <a href="#">139</a>    |

| Search | Query                                                                                                                                                                                                                                                                                                                                                                                                                                                                                                                                                                                                                                                                                                                                                                                                                                                                                                                                                                                                                                                                                                     | Items found |
|--------|-----------------------------------------------------------------------------------------------------------------------------------------------------------------------------------------------------------------------------------------------------------------------------------------------------------------------------------------------------------------------------------------------------------------------------------------------------------------------------------------------------------------------------------------------------------------------------------------------------------------------------------------------------------------------------------------------------------------------------------------------------------------------------------------------------------------------------------------------------------------------------------------------------------------------------------------------------------------------------------------------------------------------------------------------------------------------------------------------------------|-------------|
|        | (complan*[Title/Abstract] OR adhere*[Title/Abstract] OR persist*[Title/Abstract] OR possession*[Title/Abstract])) OR (((self report*[Title/Abstract] OR patient diary[Title/Abstract] OR patient diaries[Title/Abstract] OR patient recall[Title/Abstract] OR patients diaries[Title/Abstract])) AND (complan*[Title/Abstract] OR adhere*[Title/Abstract] OR persist*[Title/Abstract] OR possession*[Title/Abstract])) OR ((daily patient possession ratio*[Title/Abstract] OR daily patients possession ration*[Title/Abstract])) OR ((adherence self report questionnaire*[Title/Abstract] OR asrq[Title/Abstract])) OR ((adherence to exercise scale for older patient*[Title/Abstract] OR aesop[Title/Abstract]))) AND (((((((Guideline*[Text Word] OR practice guideline*[Text Word] OR clinical guideline*[Text Word] OR guidance[Text Word] OR consensus[Text Word] OR recommendation[Text Word]))) OR ("Guidelines as Topic"[Mesh:noexp]) OR "Practice Guidelines as Topic"[Mesh])) OR "Guideline"[Publication Type])) OR systematic[sb]) Filters: Publication date from 2008/01/01 to 2018/12/31 |             |
| #3     | Search design[Title/Abstract] OR designs[Title/Abstract] OR method[Title/Abstract] OR methods[Title/Abstract] OR methodology[Title/Abstract] OR measure[Title/Abstract] OR measures[Title/Abstract] OR measurement[Title/Abstract] OR measurements[Title/Abstract] OR calculate[Title/Abstract] OR calculated[Title/Abstract] OR calculating[Title/Abstract] OR calculation*[Title/Abstract] OR questionnaire*[Title/Abstract] OR rate[Title/Abstract] OR rating[Title/Abstract] OR ratio*[Title/Abstract] OR assessment*[Title/Abstract]                                                                                                                                                                                                                                                                                                                                                                                                                                                                                                                                                                 | 9193213     |
| #4     | Search ((design[Title/Abstract] OR designs[Title/Abstract] OR method[Title/Abstract] OR methods[Title/Abstract] OR methodology[Title/Abstract] OR measure[Title/Abstract] OR measures[Title/Abstract] OR measurement[Title/Abstract] OR measurements[Title/Abstract] OR calculate[Title/Abstract] OR calculated[Title/Abstract] OR calculating[Title/Abstract] OR calculation*[Title/Abstract] OR questionnaire*[Title/Abstract] OR rate[Title/Abstract] OR rating[Title/Abstract] OR ratio*[Title/Abstract] OR assessment*[Title/Abstract])) AND (complan*[Title/Abstract] OR adhere*[Title/Abstract] OR persist*[Title/Abstract] OR possession*[Title/Abstract])                                                                                                                                                                                                                                                                                                                                                                                                                                        | 352049      |
| #6     | Search ((self report*[Title/Abstract] OR patient diary[Title/Abstract] OR patient diaries[Title/Abstract] OR patient recall[Title/Abstract] OR patients diaries[Title/Abstract])) AND (complan*[Title/Abstract] OR adhere*[Title/Abstract] OR persist*[Title/Abstract] OR possession*[Title/Abstract])                                                                                                                                                                                                                                                                                                                                                                                                                                                                                                                                                                                                                                                                                                                                                                                                    | 10728       |
| #7     | Search (adherence self report questionnaire*[Title/Abstract] OR asrq[Title/Abstract])                                                                                                                                                                                                                                                                                                                                                                                                                                                                                                                                                                                                                                                                                                                                                                                                                                                                                                                                                                                                                     | 3           |
| #8     | Search (daily patient possession ratio*[Title/Abstract] OR daily patients possession ration*[Title/Abstract])                                                                                                                                                                                                                                                                                                                                                                                                                                                                                                                                                                                                                                                                                                                                                                                                                                                                                                                                                                                             | 122         |

## Embase

| No. | Query                                                                                                                                                                                                                                                                               | Results |
|-----|-------------------------------------------------------------------------------------------------------------------------------------------------------------------------------------------------------------------------------------------------------------------------------------|---------|
| #1  | 'rheumatic disease'/exp                                                                                                                                                                                                                                                             | 250246  |
| #2  | 'rheumatology'/exp                                                                                                                                                                                                                                                                  | 57947   |
| #3  | rheumat*:ti,ab OR arthrit*:ti,ab OR osteoarthrit*:ti,ab                                                                                                                                                                                                                             | 400873  |
| #4  | #1 OR #2 OR #3                                                                                                                                                                                                                                                                      | 470490  |
| #5  | 'kinesiotherapy'/exp                                                                                                                                                                                                                                                                | 71890   |
| #6  | 'exercise'/exp                                                                                                                                                                                                                                                                      | 311086  |
| #7  | kinesiotherap*:ti,ab OR exercise*:ti,ab OR motion*:ti,ab OR train*:ti,ab OR sport*:ti,ab OR fitness:ti,ab                                                                                                                                                                           | 1192834 |
| #8  | 'sport'/exp                                                                                                                                                                                                                                                                         | 148246  |
| #9  | 'physical activity, capacity and performance'/exp OR 'fitness'/exp                                                                                                                                                                                                                  | 839178  |
| #10 | #5 OR #6 OR #7 OR #8 OR #9                                                                                                                                                                                                                                                          | 1708802 |
| #11 | 'patient attitude'/exp                                                                                                                                                                                                                                                              | 358991  |
| #12 | barrier*:ti,ab OR attend*:ti,ab OR adher*:ti,ab OR participat*:ti,ab OR attitude*:ti,ab OR belief*:ti,ab OR complian*:ti,ab OR noncomplian*:ti,ab OR nonadher*:ti,ab OR persist*:ti,ab OR refus*:ti,ab OR interrupt*:ti,ab OR dropout*:ti,ab OR 'drop out*:ti,ab OR 'no show*:ti,ab | 2301237 |
| #13 | #11 OR #12                                                                                                                                                                                                                                                                          | 2513527 |
| #14 | #4 AND #10 AND #13                                                                                                                                                                                                                                                                  | 9278    |
| #15 | guideline*:ti,ab,de OR 'practice guideline*:ti,ab,de OR 'clinical guideline*:ti,ab,de OR guidance:ti,ab,de OR consensus:ti,ab,de OR recommendation*:ti,ab,de                                                                                                                        | 1142859 |

| No. | Query                                                                                                                                                                                                                                                                                                                                        | Results |
|-----|----------------------------------------------------------------------------------------------------------------------------------------------------------------------------------------------------------------------------------------------------------------------------------------------------------------------------------------------|---------|
| #16 | ((systematic OR method*) NEAR/3 (review* OR overview* OR study OR studies OR search* OR approach*)):ti,ab,de                                                                                                                                                                                                                                 | 1309655 |
| #17 | 'meta analy*':ti,ab,de OR 'meta-analy*':ti,ab,de OR metaanaly*':ti,ab,de                                                                                                                                                                                                                                                                     | 242659  |
| #18 | 'systematic review'/exp OR 'meta analysis'/exp                                                                                                                                                                                                                                                                                               | 266590  |
| #19 | #15 OR #16 OR #17 OR #18                                                                                                                                                                                                                                                                                                                     | 2432446 |
| #20 | #14 AND #19                                                                                                                                                                                                                                                                                                                                  | 2317    |
| #21 | 'conference abstract'/it                                                                                                                                                                                                                                                                                                                     | 3221876 |
| #22 | #20 NOT #21                                                                                                                                                                                                                                                                                                                                  | 1171    |
| #23 | [2008-2018]/py                                                                                                                                                                                                                                                                                                                               | 1,4E+07 |
| #24 | #22 AND #23                                                                                                                                                                                                                                                                                                                                  | 933     |
| #25 | 'adherence self report questionnaire*':ti,ab,kw OR asrq:ti,ab,kw                                                                                                                                                                                                                                                                             | 9       |
| #26 | 'daily patient* possession ratio*':ti,ab,kw OR dppr:ti,ab,kw                                                                                                                                                                                                                                                                                 | 21      |
| #27 | 'self report*':ti,ab,kw OR 'patient* diary':ti,ab,kw OR 'patient* diaries':ti,ab,kw OR 'patient* recall*':ti,ab,kw                                                                                                                                                                                                                           | 175564  |
| #28 | ((complan* OR adhere* OR persist* OR possession*) NEAR/3 (design OR designs OR method OR methods OR methodology OR measure OR measures OR measurement OR measurements OR calculate OR calculated OR calculating OR calculation* OR questionnaire* OR rate OR rating OR assess* OR ratio OR scale* OR instrument* OR tool OR tools)):ti,ab,kw | 54619   |
| #29 | 'adherence to exercise scale for older patients':ti,ab,kw OR aesop:ti,ab,kw                                                                                                                                                                                                                                                                  | 282     |
| #30 | #25 OR #26 OR #27 OR #28 OR #29                                                                                                                                                                                                                                                                                                              | 56609   |
| #31 | #24 AND #30                                                                                                                                                                                                                                                                                                                                  | 87      |

## Cinahl

| Search ID# | Search Terms                                                                                                                                                                                                                                                                                                                     | Search Options                | Results |
|------------|----------------------------------------------------------------------------------------------------------------------------------------------------------------------------------------------------------------------------------------------------------------------------------------------------------------------------------|-------------------------------|---------|
| S1         | patient* possession ratio* OR dppr                                                                                                                                                                                                                                                                                               | Search modes - Boolean/Phrase | 1       |
| S2         | self report* OR patient* diaries OR patient* diary OR patient* recall*                                                                                                                                                                                                                                                           | Search modes - Boolean/Phrase | 99,124  |
| S3         | ((complan* OR adhere* OR persist* OR possession*) N3 (design OR designs OR method OR methods OR methodology OR measure OR measures OR measurement OR measurements OR calculate OR calculated OR calculating OR calculation* OR questionnaire* OR rate OR rating OR assess* OR ratio* OR scale* OR instrument* OR tool OR tools)) | Search modes - Boolean/Phrase | 15,446  |
| S4         | (MH "Diaries")                                                                                                                                                                                                                                                                                                                   | Search modes - Boolean/Phrase | 9,962   |
| S5         | adherence to exercise scale for older patient*                                                                                                                                                                                                                                                                                   | Search modes - Boolean/Phrase | 1       |
| S6         | S1 OR S2 OR S3 OR S4 OR S5                                                                                                                                                                                                                                                                                                       | Search modes - Boolean/Phrase | 121,497 |
| S7         | (MH "Rheumatology")                                                                                                                                                                                                                                                                                                              | Search modes - Boolean/Phrase | 2,427   |
| S8         | (MH "Rheumatic Diseases+")                                                                                                                                                                                                                                                                                                       | Search modes - Boolean/Phrase | 56,773  |
| S9         | Rheumat* OR arthrit* OR osteoarthritis*                                                                                                                                                                                                                                                                                          | Search modes - Boolean/Phrase | 81,762  |
| S10        | S7 OR S8 OR S9                                                                                                                                                                                                                                                                                                                   | Search modes - Boolean/Phrase | 91,263  |
| S11        | (MH "Patient Compliance+") OR (MH "Treatment Refusal")                                                                                                                                                                                                                                                                           | Search modes - Boolean/Phrase | 46,100  |
| S12        | barrier* OR attend* OR adher* OR participat* OR attitude* OR belief* OR complian* OR noncomplan* OR nonadher* OR persist* OR refus* OR interrupt* OR dropout* OR drop out* OR "no show"                                                                                                                                          | Search modes - Boolean/Phrase | 692,879 |
| S13        | S11 OR S12                                                                                                                                                                                                                                                                                                                       | Search modes - Boolean/Phrase | 692,879 |
| S14        | (MH "Exercise+") OR (MH "Physical Fitness+") OR (MH "Sports+")                                                                                                                                                                                                                                                                   | Search modes - Boolean/Phrase | 151,398 |

|     |                                                                                                                                                                                                                                        |                                                                               |         |
|-----|----------------------------------------------------------------------------------------------------------------------------------------------------------------------------------------------------------------------------------------|-------------------------------------------------------------------------------|---------|
| S15 | (MH "Therapeutic Exercise+")                                                                                                                                                                                                           | Search modes - Boolean/Phrase                                                 | 45,870  |
| S16 | kinesiotherap* OR exercise* OR motion* OR train* OR sport* OR fitness                                                                                                                                                                  | Search modes - Boolean/Phrase                                                 | 412,522 |
| S17 | S14 OR S15 OR S16                                                                                                                                                                                                                      | Search modes - Boolean/Phrase                                                 | 441,634 |
| S18 | S6 AND S10 AND S13 AND S17                                                                                                                                                                                                             | Search modes - Boolean/Phrase                                                 | 304     |
| S19 | ( PT (Systematic Review or Meta Analysis) ) OR ( (((systematic or method*) N3 (review* or overview* or study or studies or search* or approach*)) or meta analy* or meta-analy* or metaanaly* ) OR ( (pooled N1 (data or analys*)) ) ) | Search modes - Boolean/Phrase                                                 | 279,253 |
| S20 | ( Guideline* or guidance or consensus or recommendation* ) OR PT practice guidelines                                                                                                                                                   | Search modes - Boolean/Phrase                                                 | 272,718 |
| S21 | S19 OR S20                                                                                                                                                                                                                             | Search modes - Boolean/Phrase                                                 | 517,411 |
| S22 | S18 AND S21                                                                                                                                                                                                                            | Search modes - Boolean/Phrase                                                 | 77      |
| S23 | S18 AND S21                                                                                                                                                                                                                            | Limiters - Published Date: 20080101-20181231<br>Search modes - Boolean/Phrase | 66      |

### Cochrane Library

| ID  | Search                                                                                                                                                                                                                                                                                                                                | Hits   |
|-----|---------------------------------------------------------------------------------------------------------------------------------------------------------------------------------------------------------------------------------------------------------------------------------------------------------------------------------------|--------|
| #1  | MeSH descriptor: [Rheumatic Diseases] explode all trees                                                                                                                                                                                                                                                                               | 12896  |
| #2  | Rheumat* or arthrit* or osteoarthritis*                                                                                                                                                                                                                                                                                               | 33240  |
| #3  | #1 or #2                                                                                                                                                                                                                                                                                                                              | 34137  |
| #4  | MeSH descriptor: [Treatment Adherence and Compliance] explode all trees                                                                                                                                                                                                                                                               | 24506  |
| #5  | barrier* or attend* or adher* or participat* or attitude* or belief* or complian* or noncompliant* or nonadher* or persist* or refus* or interrupt* or dropout* or drop out* or "no show"                                                                                                                                             | 190622 |
| #6  | #4 or #5                                                                                                                                                                                                                                                                                                                              | 198382 |
| #7  | #3 and #6                                                                                                                                                                                                                                                                                                                             | 6600   |
| #8  | MeSH descriptor: [Exercise] explode all trees                                                                                                                                                                                                                                                                                         | 20890  |
| #9  | MeSH descriptor: [Exercise Therapy] explode all trees                                                                                                                                                                                                                                                                                 | 11341  |
| #10 | MeSH descriptor: [Exercise Movement Techniques] explode all trees                                                                                                                                                                                                                                                                     | 1759   |
| #11 | MeSH descriptor: [Sports] explode all trees                                                                                                                                                                                                                                                                                           | 13975  |
| #12 | kinesiotherap* or exercise* or motion* or train* or sport* or fitness                                                                                                                                                                                                                                                                 | 139641 |
| #13 | #8 or #9 or #10 or #11 or #12                                                                                                                                                                                                                                                                                                         | 141385 |
| #14 | #7 and #13 with Publication Year from 2008 to 2018                                                                                                                                                                                                                                                                                    | 1973   |
| #15 | ((compliant* OR adhere* OR persist* OR possession*) NEAR/3 (design OR designs OR method OR methods OR methodology OR measure OR measures OR measurement OR measurements OR calculate OR calculated OR calculating OR calculation* OR questionnaire* OR rate OR rating OR assess* OR ratio OR scale* OR instrument* OR tool OR tools)) | 11017  |
| #16 | patient* possession ratio* OR dppr                                                                                                                                                                                                                                                                                                    | 190    |
| #17 | "self report" OR diaries OR diary OR "patient* recall" OR "self reports" OR "patient recalls"                                                                                                                                                                                                                                         | 23739  |
| #18 | #15 OR #16 OR #17                                                                                                                                                                                                                                                                                                                     | 33373  |
| #19 | #14 AND #18 with Cochrane Library publication date Between Jan 2008 and Jan 2018, in Cochrane Reviews                                                                                                                                                                                                                                 | 186    |
