# Supplementary material for: Prevention, screening, assessing and managing of non-adherent behaviour in people with rheumatic and musculoskeletal diseases: systematic reviews informing the 2020 EULAR points to consider
Source: PubMed Central journal article supplement — RMD Open. 2020 Nov 9;6(3):e001432. doi: 10.1136/rmdopen-2020-001432 (PMC7856118; doi:10.1136/rmdopen-2020-001432), 2020-11-09
Supplement: rmdopen-2020-001432supp002.pdf [file rmdopen-2020-001432supp002.pdf]

## Supplement\_B\_PICO\_1

### Clinical Question 1: What strategies are efficacious in managing non-adherence?

All interventions aiming to improve adherent behaviour (in regards to regarding medication/exercise adherence, adherence to diet/visits) in comparison to SoC or other interventions were included.

#### Summary

The screening by title and abstract yielded 38 studies to appraise in full-text, of which 4[1-4] reviews on interventions to improve adherence to medications, 8[5-12] reviews on adherence to exercise and 1[13] on adherence to follow-up visits were finally included. We did not find any review regarding non-adherence to diet. In total, these reviews, included 17 original studies regarding medication non-adherence[14-30], 34 on exercise/physical activity non-adherence[17, 31-63], and 3 on non-adherence to follow up visits[64-66]. The details and descriptions interventions are displayed in Table 1 to 16.

#### Abbreviations

CBP, chronic back pain  
CBT, cognitive-behavioural therapy  
CG, control group  
CQR, Compliance Questionnaire in Rheumatology  
Diag., diagnosis  
Edu, education  
IG, intervention group  
JIA, juvenile idiopathic arthritis  
IBD, inflammatory bowel disease  
MMAS, Morisky Green Adherence Screening  
OA, osteoarthritis  
Observ., observational  
OP, osteoporosis  
PSP, Patient support program  
QoL, quality of life  
RA, rheumatoid arthritis  
RCT, randomised controlled trial  
RoB, risk of bias  
SoC, standard of care  
SLE, systemic lupus erythematosus

#### Adherence to medications

A broad variety of assessments was used in the studies, such as the Morisky Medication Adherence Score[1], Compliance Questionnaire on Rheumatology[1], customized questionnaires[2] [3], concentration of medication or metabolites[1], refill data from pharmacies or pill count, medical records[1, 4].

As the interventions were very different in content, the qualitative analysis was performed by classifying the interventions into four categories: educational, behavioural, cognitive behavioural, and multicomponent intervention[1, 67]. Interventions that did not fit into these categories were labelled as "other interventions". Following Greenley, Kunz [67], (1) educational interventions aim to enhance patient knowledge (disease and symptoms, benefits and mechanisms interventions, consequences of non-adherence and side effects of interventions); (2) behavioural interventions aim to enhance the act of being adherent to different interventions, by providing incentives for medication taking/performing exercises; (3) CBTs enhance adherence by altering thinking patterns that contribute to non-adherence while also establishing behavioural patterns that support adherence using behavioural strategies; (4) multicomponent interventions use multiple strategies to enhance adherence including educational, behavioural, cognitive behavioural, motivational and/or support provision strategies.

**Educational interventions** were found in 7 studies. The detailed summary is shown in Table 2. Four of these interventions reached significant differences (telephone-based, patient-tailored pharmacy advisory service[14], information about drugs,

disease, and disease progression[15], rheumatologist-delivered, agreed treatment and ongoing assessment[19], and individualised counselling sessions from a clinical pharmacist[20]. Brus, van de Laar [17] (using therapy, energy conservation, joint protection) and Conn, Pan [18] (instructor-led, group-based Arthritis Self-Management Program) did not reach significance. Homer, Nightingale [16], found no differences in the way the education was provided for the patients. In a comparison of group and individual settings, none of the settings were found to be better.

Three of the studies used **behavioural interventions**. The detailed summary is shown in Table 3. Only the visualization of disease progression resulted in a significant difference regarding non-adherent behaviour, compared to the control group (SoC)[21]. Text Messaging Reminders did not increase the use of hydroxychloroquine but to follow up visits[23]. In the study from van den Bemt, den Broeder [22] the adherence pattern were reported to the treating physician, but the knowledge of the physician regarding the adherence patterns of their patients did not result in an significant increase.

Only one study used **CBT** to increase adherence levels (Table 4). An approach that addresses dysfunctional emotions, behaviours, and thought processes through goal-oriented psychotherapy proved to be effective at 12 months[24].

Three studies used **multicomponent interventions** (Table 5). In all three studies a significant difference was measured. Balato, Megna [25] and El Miedany, El Gaafary [26] used a combination of educational and behavioural interventions (educational about disease, and daily life, in combination with daily text messages, reminders[25], respectively evaluation and review of patient reported outcomes measures as well as education on skills for self-care and decision making, and joint fitness program[26] ) interventions. In the study of McEvoy Devellis, Blalock [27] an educational affective (psychosocial interview and problem-solving intervention) was used.

Three studies used **other interventions** (Table 6). Lai, Chua [28] used pharmaceutical counselling sessions, which included medication review, education/information on osteoporosis, risk factors, lifestyle modifications, goals of therapy, side effects and the importance of medication adherence, which resulted in an significant increase in adherent behaviour. However, Solomon, Iversen [29] did not reach a significant difference compared to the control group (using telephone-based counselling) and the results of Stockl, Shin [30] were inconclusive regarding adherence-outcomes (using mailed [or emailed] reminders and information, as well as phone support).

## Adherence to prescribed exercise

Number of sessions attended/exercises done (self-reported, therapist-reported) [5, 8, 9, 11, 12], Self-reported physical activity scales, e.g. Physical Activity Scale for the Elderly (PASE) [10, 11], Adherence Stanford Scale [7], and customized questionnaires, such as 5-point Likert scales or 7-day physical activity recall[6] were used to assess adherence rates reported in the reviews (Table 7).

Similar to the section on adherence to medications, we classified the different interventions. We used 6 different categories to classify the interventions: (1) educational interventions; (2) behavioural interventions[67]; (3) exercise class based interventions enhance adherence by altering thinking patterns that contribute to non-adherence while also establishing behavioural patterns that support adherence using behavioural strategies; (4) motivational based intervention; (5) multicomponent interventions[67] and (6) other interventions.

**Educational interventions** (Table 8) were found in 9 studies and had as content general information on the disease, treatment, interventions and/or exercises, adherence and possible problems with non-adherent behaviour, and benefit of exercises/physical activity. Education was delivered in very different ways, web-based[31], mail-based[33], pamphlet/brochure/booklet based[34, 38], face-to-face[36], and based on audio/video tapes[37]. Five of these interventions reached significance[17, 31, 33, 35, 36] compared to the control group, the other four did not.

**Behavioural interventions** (Table 9) to increase adherence to exercises/physical activity was examined in 10 articles, 4 studies [39, 42, 44, 46, 47] (5 articles, in one study the follow up was reported in an extra article[46, 47]) of them had a significant increase in adherence-outcomes. The main content of the behavioural interventions were counselling [39-44], goal setting[40, 42-44, 51, 52], persuasive argument[43, 46, 47, 51, 52], coping/action planning[43-45], (self-)monitoring[43, 44, 46, 47, 51, 52], social support[42, 44, 46, 47, 51, 52].

**Exercise class based interventions** (Table 10) or supervised-exercises to increase adherence were used in 3 studies[48-50] of which 2 had a significant increase in adherence to treatment[48, 50].

**Motivational interventions** (Table 11) were found in 2 studies, both had a significant increase in adherence to treatment[53, 54]. Hughes, Seymour [53] compared negotiated vs. mainstreamed follow-up with telephone reinforcement and Vong, Cheing [54] motivational enhancement therapy in combination with exercises/home exercise compared to exercises/home exercise only.

Four studies used **multicomponent interventions** (Table 12) (multiple strategies) to enhance adherence including education, counselling, and positive reinforcement[55]; daily exercise diaries, booklet exercise instructions (including photographs), and behaviour change strategies[56]; group education, self-management, and global upper extremity exercise training sessions[57]; and daily exercise diaries, booklet exercise instructions (including photographs), and review appointment[58]. The study from Friedrich, Gittler [55] showed significant results regarding adherence, the other studies[56-58] reported high adherence rates, but data are not presented in the studies.

**Other Interventions** to Increase Adherence to Exercises/Physical Activity are presented in Table 13. These were booster sessions (review of exercises, discussion/plans to increase adherence) in combination with exercises/home exercises[59], cost free programs compared to fee-based programs[60], computer-assisted video instruction compared to conventional education[61], pedometer-based intervention (goal of increasing their step count by 30%)[62], and demonstration and coaching of performing exercises compared to verbal explanations of home exercises[63]. Three of these interventions[60, 62, 63] reached a significant differences compared to the control-intervention.

## Adherence to diet and clinical visits

We did not find any review regarding diets, and one review regarding (non-)adherence to visits[13] (Table 14). Taneja, Su'a [13] reviewed studies regarding "patient-initiated follow up". Three of these studies were on rheumatoid arthritis[64-66] (Table 15). The patients did not have routine hospital visits but rapid access for an appointment on request. Patients reported to have less pain, less resources per patient were required, and patients were more confident in their system of care. No clinical differences were found in the long-term, but greater self-efficacy and satisfaction with care.

## Summary

Overall, of the results, 29 indicate positive impact of interventions on adherence, 18 had no impact and 6 of the studies did not present the results clearly (Table 16).

**Table 1. Reviews used for PICO 1: Adherence to pharmacological interventions**

| No | Review; year                    | Studies                                                                                                | Diseases                                               | Interventions                                                   | Assessments                                                                 |
|----|---------------------------------|--------------------------------------------------------------------------------------------------------|--------------------------------------------------------|-----------------------------------------------------------------|-----------------------------------------------------------------------------|
| 1  | Depont, Berenbaum [1]; 2015     | 14 RCT, 1 observ. study                                                                                | 6 IBD, 7 RA, 1 psoriasis, 1 MS                         | Educational, behavioural, cognitive behavioural, multicomponent | MMAS, CQR, concentration of medication/metabolites, refill data, pill count |
| 2  | Galo, Mehat [2]; 2015           | 23 RCT to classify interventions, 13 RCT to measure impact on intervention to increase adherence       | 16 RA, 3 SLE, 1 gout, 2 JIA, 1 unspecified arthritis   | Educational, behavioural, affective                             | Validated measures of adherence                                             |
| 3  | Ganguli, Clewell [3], 2016      | 64 Studies, OP (2x RCT, prospective cohort), RA (1x Quasi-experimental, 1x retrospective cohort study) | Diverse conditions (2 OP, 1 RA) with adherence outcome | PSPs                                                            | Validated measures of adherence (mixed)                                     |
| 4  | Nieuwlaat, Wilczynski [4], 2014 | 182 RCTs                                                                                               | Diverse conditions, 3 RA                               | Patient education, feedback                                     | Pill count, medical records                                                 |

**Table 2. Studies on Educational Interventions (single) to Increase Adherence to Pharmacological Interventions**

| No | Study/Design                             | N   | Diag. | Intervention/Control                                                                                                                    | Results                                                                          | RoB          |
|----|------------------------------------------|-----|-------|-----------------------------------------------------------------------------------------------------------------------------------------|----------------------------------------------------------------------------------|--------------|
| 1  | Clifford, Barber [14], 2006; RCT         | 500 | RA    | Educational (telephone-based, patient-tailored pharmacy advisory service)/ vs. SoC                                                      | Adherence to treatment increased (4 weeks)                                       | High quality |
| 2  | Hill, Bird [15], 2001; RCT               | 100 | RA    | Educational (information about drugs, disease, progression) vs. SoC                                                                     | Adherence to treatment increased (pharmacological marker, after 6 months)        | High quality |
| 3  | Homer, Nightingale [16], 2009; Pilot RCT | 62  | RA    | Educational individual vs. group counselling                                                                                            | No difference compared to the control group (Pill count after 12 months, p 0.06) | Low quality  |
| 4  | Brus, van de Laar [17], 1998; RCT        | 55  | RA    | Educational (therapy, energy conservation, joint protection) Experimental group (6 education meeting) vs control group (Brochure on RA) | No difference compared to the control group (after 3, 6, and 12 months)          | Low quality  |
| 5  | Conn, Pan [18], 2013; RCT                | 104 | RA    | Educational (instructor-led, group-based Arthritis Self-Management Program -ASMP) vs. SoC                                               | No difference compared to the control group (6, 12, 18 months)                   | High quality |
| 6  | Ravindran and Jadhav [19], 2013; RCT     | 122 | RA    | Educational (rheumatologist-delivered, agreed treatment, ongoing assessment) vs. SoC                                                    | Adherence to treatment increased (4 weeks)                                       | Low quality  |
| 7  | Ganachari and Almas [20], 2012; RCT      | 45  | SLE   | Educational (3 individualised counselling sessions from a clinical pharmacist) vs. routine counselling                                  | Adherence to treatment increased (2 months)                                      | Low quality  |

**Table 3. Studies on Behavioural Interventions (single) to Increase Adherence to Pharmacological Interventions**

| No | Study/Design                                 | N   | Diag. | Intervention/Control                                                                                                                                          | Results                                                                                                | RoB                    |
|----|----------------------------------------------|-----|-------|---------------------------------------------------------------------------------------------------------------------------------------------------------------|--------------------------------------------------------------------------------------------------------|------------------------|
| 1  | El Miedany, El Gaafary [21], 2012; Pilot RCT | 111 | RA    | Behavioural (visualization of disease progression) vs. SoC                                                                                                    | Adherence to treatment increased (12 months)                                                           | No serious limitations |
| 2  | van den Bermt, den Broeder [22], 2011; RCT   | 50  | RA    | Behavioural (report on patient adherence hand to physician) vs. SoC                                                                                           | No difference compared to the control group (median time between the assessments was 102 days)         | Lack of Power          |
| 3  | Ting, Kudalkar [23], 2012; RCT               | 70  | SLE   | Behavioural (Cellular Text Messaging Reminders (CTMR) on adherence to clinic visits; the influence of CTMR on adherence to use of hydroxychloroquine) vs. SoC | No difference compared to the control group at 14 months (adherence to visits increased significantly) | Low quality            |

**Table 4. Studies on Cognitive Behavioural Interventions (single) to Increase Adherence to Pharmacological Interventions**

| No | Study/Design                     | N  | Diag. | Intervention/Control                                                                                                                                  | Results                                      | RoB                    |
|----|----------------------------------|----|-------|-------------------------------------------------------------------------------------------------------------------------------------------------------|----------------------------------------------|------------------------|
| 1  | Evers, Kraaimaat [24], 2002; RCT | 59 | RA    | Cognitive behavioural (approach that addresses dysfunctional emotions, behaviours, and thought processes through goal-oriented psychotherapy) vs. SoC | Adherence to treatment increased (12 months) | No serious limitations |

**Table 5. Studies on Multicomponent Interventions to Increase Adherence to Pharmacological Interventions**

| No | Study/Design                                     | N   | Diag.     | Intervention/Control                                                                                                                                                                       | Results                                      | RoB                    |
|----|--------------------------------------------------|-----|-----------|--------------------------------------------------------------------------------------------------------------------------------------------------------------------------------------------|----------------------------------------------|------------------------|
| 1  | Balato, Megna [25], 2013; RCT                    | 40  | Psoriasis | Multicomponent (educational [disease, daily life] +behavioural [daily text messages, providing reminders]) vs. SoC                                                                         | Adherence to treatment increased (3 months)  | No serious limitations |
| 2  | El Miedany, El Gaafary [26], 2012b; RCT          | 147 | RA        | Educational behavioural affective (evaluation and review of patient reported outcomes measures + education on skills for self-care and decision making, and joint fitness program) vs. SoC | Adherence to treatment increased (18 months) | No serious limitations |
| 3  | McEvoy Devel-<br>lis, Blalock [27],<br>1988; RCT | 101 | RA        | Educational affective (psychosocial interview + problem-solving intervention) vs. psycho-<br>social interview alone                                                                        | Adherence to treatment increased (4 months)  | Low quality            |

**Table 6. Studies on Other Interventions to Increase Adherence to Pharmacological Interventions**

| No | Study/Design                                        | N    | Diag.        | Intervention/Control                                                                                                                                                     | Results                                                                                                                  | RoB          |
|----|-----------------------------------------------------|------|--------------|--------------------------------------------------------------------------------------------------------------------------------------------------------------------------|--------------------------------------------------------------------------------------------------------------------------|--------------|
| 1  | Lai, Chua [28],<br>2013;<br>RCT                     | 198  | Osteoporosis | Medication review, information on osteoporosis, risk factors, lifestyle modifications, goals of therapy, side effects and the importance of medication adherence; vs SoC | Adherence was reported as “better”, numbers are not reported (3, 6, 12 months); knowledge, QOL and satisfaction improved | Not reported |
| 2  | Solomon,<br>Iversen [29],<br>2012; RCT              | 2087 | Osteoporosis | Telephone-based counseling; vs SoC                                                                                                                                       | No difference compared to the control group (60 days intervals – 360 days) (P = 0.074)                                   | Not reported |
| 3  | Stockl, Shin [30], 2010; Retrospective cohort study | 732  | RA           | Mailed or emailed reminders and information, phone support; vs non-participating cohort                                                                                  | Mixed outcomes (6 months)                                                                                                | Not reported |

**Table 7. Reviews used for PICO 1: (Non-)Adherence to exercise/physical activity**

| No | Review; year                | Studies                       | Diseases                             | Interventions                                                                                                                                                                                                                                             | Assessments                              |
|----|-----------------------------|-------------------------------|--------------------------------------|-----------------------------------------------------------------------------------------------------------------------------------------------------------------------------------------------------------------------------------------------------------|------------------------------------------|
| 1  | Baillet, Zeboulon [5], 2010 | 14 RCTs                       | RA                                   | Compared different types of exercises (no specific interventions on adherence):<br>Dynamic exercise program criteria (n=5).<br>Control:<br>range of motion exercises (n=3)<br>non-aerobic exercises (n=1)<br>education programs (n=2)<br>usual care (n=8) | Number of completers                     |
| 2  | Ezzat, MacPherson [6], 2015 | 19 RCTs                       | RA, OA                               | Knowledge-, motivational-, pedometer-based, and behavioural interventions                                                                                                                                                                                 | Custom made questionnaires, self reports |
| 3  | Gay, Chabaud [7], 2016      | 13 RCTs and 8 recommendations | Hip and knee OA, 1 outcome adherence | Treatment-based education for physical activity and exercise programs                                                                                                                                                                                     | Adherence Stanford scale                 |
| 4  | Hammond and Prior [8], 2016 | 3 RCT                         | RA                                   | Behaviour strategies                                                                                                                                                                                                                                      | Self reports                             |

| No | Review; year                  | Studies                            | Diseases                                                               | Interventions                                                                                                                                                                                              | Assessments                                                                |
|----|-------------------------------|------------------------------------|------------------------------------------------------------------------|------------------------------------------------------------------------------------------------------------------------------------------------------------------------------------------------------------|----------------------------------------------------------------------------|
| 5  | Jansons, Haines [9], 2017     | 11 RCT/ observational studies      | Diverse conditions, 1 OA                                               | Centre based programs; home exercise programs with telephone follow-up; home exercise programs with no follow-up; weaning programs that transitioned patients to an independent, off-site exercise program | Records at the gymnasium, log books, self reports                          |
| 6  | Larkin, Gallagher [10], 2015  | 5 RCT                              | RA                                                                     | Behaviour change interventions                                                                                                                                                                             | Questionnaire to assess amount of physical activity                        |
| 7  | Mazieres, Thevenon [11], 2008 | 12 RCT, 4 reviews/ recommendations | Hip and knee OA                                                        | Education, supervision, phone calls, monitoring                                                                                                                                                            | Mean number of sessions/ exercises, adherence rates, diary, estimates      |
| 8  | Nicolson, Bennell [12], 2017  | 9 RCT                              | Older adults with chronic low back pain and/or hip/knee osteoarthritis | Counselling, motivation program, education, positive reinforcement, booster sessions, goal setting, action + coping plan, tailored behavioural graded exercises, audiotape/videotape with cues             | Self reported logbook, self-reports, therapist-reported (class attendance) |

**Table 8. Educational/ Knowledge-Based Interventions to Increase Adherence to Exercises/Physical Activity**

| No | Study/Design                                          | N    | Diag.           | Intervention/Control                                                                                                                                                                              | Results                                                                                              | RoB          |
|----|-------------------------------------------------------|------|-----------------|---------------------------------------------------------------------------------------------------------------------------------------------------------------------------------------------------|------------------------------------------------------------------------------------------------------|--------------|
| 1  | Bossen, Veenhof [31], 2013; RCT                       | 199  | Hip/knee OA     | Knowledge-based intervention (nine-week web-based, behavioural graded activity programme intervention) vs waiting list                                                                            | Adherence to treatment increased (levels of subjective physical activity, 12 months)                 | High quality |
| 2  | Brus, van de Laar [17], 1998; RCT                     | 65   | RA              | Knowledge-based intervention + patient education (information on RA, attendant problems, basic treatment, beliefs were discussed) vs brochure about RA and its treatment                          | Adherence to treatment increased (at 3 months)                                                       | Low quality  |
| 3  | Farr, Going [32], 2010; RCT                           | 293  | OA              | Knowledge-based intervention (Self-management intervention: overview of OA, general exercise principles and PA recommendations, stress management, foot care, pain management, analgesic) vs SoC  | No difference compared to the control group (9 months)                                               | Low quality  |
| 4  | Fries, Carey [33], 1997; RCT                          | 1099 | mixed arthritis | knowledge-based intervention (mail-delivered arthritis self-management program) vs SoC                                                                                                            | Adherence to treatment increased (at 6 and 12 months)                                                | Low quality  |
| 5  | Halbert, Crotty [34], 2001; RCT                       | 69   | OA              | Knowledge-based intervention (3x tailored PA advice f2f) vs nutrition pamphlet + advice f2f                                                                                                       | No difference compared to the control group (self reported walking frequency, after 3, 6, 12 months) | High quality |
| 6  | Mayoux-Benhamou, Giraudet-Le Quintrec [35], 2008; RCT | 208  | RA              | Knowledge-based intervention + patient education (multidisciplinary education program, including training in home-based exercises and guidelines for leisure physical activity) vs. SoC + booklet | Adherence to treatment increased (6 months), not significant at 12 months                            | Low quality  |
| 7  | Ravaud, Flipo [36], 2009; RCT                         | 336  | OA              | Knowledge-based intervention (3 visits: OA edu., treatment management, information on PA and weight loss) vs. SoC                                                                                 | Adherence to treatment increased (time spent, physical exercises in                                  | High quality |

| No | Study/Design                      | N   | Diag.       | Intervention/Control                                                                                                                                                                                                  | Results                                                                                                    | RoB          |
|----|-----------------------------------|-----|-------------|-----------------------------------------------------------------------------------------------------------------------------------------------------------------------------------------------------------------------|------------------------------------------------------------------------------------------------------------|--------------|
|    |                                   |     |             |                                                                                                                                                                                                                       | leisure subscale of Baecke Index at 4 and 12 months)                                                       |              |
| 8  | Schoo, Morris [37], 2005; RCT     | 115 | Hip/knee OA | Knowledge-based intervention: verbal instructions on a home exercise program in addition to: (i) a home exercise brochure; (ii) a brochure together with an audiotape; or (iii) a brochure together with a videotape. | No difference compared to the control group (adherence good for all groups at 4 and 8 weeks)               | Low quality  |
| 9  | Williams, Amoakwa [38], 2011; RCT | 119 | Hip/knee OA | Knowledge-based intervention (advice booklet outlining benefits of PA) vs standard information booklet                                                                                                                | No difference compared to the control group (small benefit, but 95% CI crossed zero, after 1 and 3 months) | High quality |

**Table 9. Behavioural Interventions to Increase Adherence to Exercises/Physical Activity**

| No | Study/Design                                          | N   | Diag.                 | Intervention/Control                                                                                                                                                                                                                                                                                                                 | Results                                                                                                                                         | RoB                                         |
|----|-------------------------------------------------------|-----|-----------------------|--------------------------------------------------------------------------------------------------------------------------------------------------------------------------------------------------------------------------------------------------------------------------------------------------------------------------------------|-------------------------------------------------------------------------------------------------------------------------------------------------|---------------------------------------------|
| 1  | Basler, Bertalanffy [39], 2007; RCT                   | 170 | Chronic low back pain | CG: exercise sessions + home exercises; IG: CG + counselling at each session                                                                                                                                                                                                                                                         | Significance not reported in detail                                                                                                             | High RoB                                    |
| 2  | Brosseau et al. [40], 2012; RCT                       | 222 | OA                    | Behavioural interventions (supervised walking + behaviour [goal setting, education, monthly f2f counselling) vs. walking SV vs. self-directed control                                                                                                                                                                                | No difference compared to the control group (number of attendances at 3, 6, 12, 18 months)                                                      | High quality                                |
| 3  | Frost [41], 2004; Pilot RCT                           | 26  | Hip OA (TEP)          | Behavioural interventions (counselling intervention on exercise adherence)                                                                                                                                                                                                                                                           | No difference compared to the control group (PhD Thesis, work not found)                                                                        | High quality                                |
| 4  | Huffman, Sloane [42], 2010; RCT                       | 178 | mixed arthritis       | Physical activity counselling programme [PA benefits were identified, short term PA goals were established, barriers to PA were discussed, and a source of social support for PA] vs. usual care                                                                                                                                     | Adherence to treatment increased (after 3, 6, 12 months)                                                                                        | Low quality                                 |
| 5  | John, Hale [43], 2013; RCT                            | 110 | RA                    | Behaviour change interventions (Persuasive argument, coping planning, graded goal setting, self-monitoring, review of behaviour goals) vs information and/or education                                                                                                                                                               | No difference compared to the control group (at 2 and 6 months)                                                                                 | High risk of bias for one or more domains   |
| 6  | Knittle, De Gucht [44], 2013; RCT                     | 78  | RA                    | Behaviour change interventions (Graded tasks, social support (general), pros and cons identification, goal setting, self-monitoring, problem solving/coping planning, self-reward, focus on past success, action planning, review of behaviour goals, anticipation of future rewards, prompts/ cues) vs information and/or education | Increase in physical activity behaviour post-treatment and at 6 months, which was statistically significant in comparison with the control arm. | High risk of bias for one or more domains   |
| 7  | Mayoux-Benhamou, Giraudet-Le Quintrec [35], 2008; RCT | 208 | RA                    | Behaviour change interventions (Persuasive argument, pros and cons identification, instruction on how to perform a behaviour, behavioural rehearsal/ practice) vs. SoC + booklet                                                                                                                                                     | Short-term significant increase in physical activity behaviour (6 months) compared to the control arm, but this                                 | Low or unclear risk of bias for all domains |

| No | Study/Design                                                                   | N           | Diag. | Intervention/Control                                                                                                                                                                                                                     | Results                                                                                                                                      | RoB                                       |
|----|--------------------------------------------------------------------------------|-------------|-------|------------------------------------------------------------------------------------------------------------------------------------------------------------------------------------------------------------------------------------------|----------------------------------------------------------------------------------------------------------------------------------------------|-------------------------------------------|
|    |                                                                                |             |       |                                                                                                                                                                                                                                          | increase was not maintained at 12-month follow-up                                                                                            |                                           |
| 8  | O'Brien, Bassett [45], 2013; RCT                                               | 27          | OA    | Behavioural interventions (exercise, plus action and coping plan) vs. only exercise                                                                                                                                                      | No difference compared to the control group (after 8 weeks)                                                                                  | Unclear RoB                               |
| 9  | Van den Berg, Ronday [46], 2006; RCT<br>Hurkmans, Van den Berg [47], 2010; RCT | 160/<br>110 | RA    | Behaviour change interventions (Instruction on how to perform a behaviour self-monitoring, persuasive argument, monitoring strategies, social support (practical), social comparison) [tailored vs. general]                             | Significant increase in moderate and vigorous physical activity behaviour at 6, 9, 12 but not at 24 months when compared to the control arm. | High risk of bias for one or more domains |
| 10 | Brodin, Eurenus [51], 2008; RCT<br>Sjöquist, Brodin [52], 2011; RCT            | 228         | RA    | Behaviour change/ Motivational interventions (Pros and cons identification, goal setting, review of behaviour goals, problem solving, persuasive argument, self-monitoring of behaviour, social support) vs information and/or education | No difference compared to the control group (amount of PA after 3, 6, 9, 12, 24 months)                                                      | High risk of bias for one or more domains |

**Table 10. Exercise Class Based Interventions to Increase Adherence to Exercises/Physical Activity**

| No | Study/Design                     | N   | Diag.       | Intervention/Control                                                                                                                                     | Results                                                                        | RoB                        |
|----|----------------------------------|-----|-------------|----------------------------------------------------------------------------------------------------------------------------------------------------------|--------------------------------------------------------------------------------|----------------------------|
| 1  | Hughes, Seymour [48], 2006; RCT  | 215 | Hip/knee OA | Exercise class-based (Exercises, Education–Behaviour Change, Reinforcement) vs. The Arthritis Help Book and a list of exercise programs in the community | Adherence to treatment increased (2, 6, 12 months)                             | Low quality                |
| 2  | McCarthy, Mills [49], 2004; RCT  | 214 | OA          | Home exercise programme + class-based exercise vs. home exercise alone                                                                                   | No difference compared to the control group (12 months)                        | Not reported in the review |
| 3  | Pisters, Veenhof [50], 2010; RCT | 200 | Hip/knee OA | Exercise class-based (educational messages + performance charts + activity diaries) vs SoC                                                               | Adherence to treatment increased (self-rated five-point scale at 13, 65 weeks) | Unclear RoB                |

**Table 11. Motivational Based Interventions to Increase Adherence to Exercises/Physical Activity**

| No | Study/Design                    | N   | Diag.       | Intervention/Control                                                                             | Results                                                                                         | RoB         |
|----|---------------------------------|-----|-------------|--------------------------------------------------------------------------------------------------|-------------------------------------------------------------------------------------------------|-------------|
| 1  | Hughes, Seymour [53], 2010; RCT | 419 | Hip/knee OA | To compare the impact of negotiated vs. mainstreamed follow-up with telephone reinforcement (TR) | Adherence to treatment increased (on maintenance of physical activity (PA) at 2, 6, 12, and 18) | not stated  |
| 2  | Vong, Cheing [54], 2011; RCT    | 76  | CBP         | CG: exercise sessions + tailored home exercises; IG: CG + Motivational Enhancement Therapy       | Adherence to treatment increased (No of sessions (4 weeks))                                     | Unclear RoB |

**Table 12. Multicomponent Interventions to Increase Adherence to Exercises/Physical Activity**

| No | Study/Design                       | N   | Diag.                 | Intervention/Control                                                                                                                    | Results                                                                                      | RoB          |
|----|------------------------------------|-----|-----------------------|-----------------------------------------------------------------------------------------------------------------------------------------|----------------------------------------------------------------------------------------------|--------------|
| 1  | Friedrich, Gittler [55], 1998; RCT | 93  | Chronic low back pain | CG: exercise sessions + tailored home exercises; IG: CG + education, counselling, pos. reinforcement                                    | Adherence to treatment increased (attendance (4 months), amount of days trained (12 months)) | High RoB     |
| 2  | Lamb, Williamson [56], 2015; RCT   | 490 | RA                    | Multicomponent intervention (daily exercise diaries, booklet exercise instructions + photographs + behaviour change strategies) vs. SoC | Data on adherence not clearly reported                                                       | High quality |
| 3  | Manning, Hurley [57], 2014; RCT    | 108 | RA                    | Multicomponent intervention (group education, self-management, and global upper extremity exercise training sessions) vs. SoC           | Data on adherence not clearly reported                                                       | High quality |
| 4  | O'Brien, Jones [58], 2006; RCT     | 67  | RA                    | Daily exercise diaries, booklet exercise instructions + photographs + review appointment vs. joint protection only                      | Data on adherence not clearly reported                                                       | High quality |

**Table 13. Other Interventions to Increase Adherence to Exercises/Physical Activity**

| No | Study/Design                        | N   | Diag.              | Intervention/Control                                                                                                                              | Results                                                                              | RoB                        |
|----|-------------------------------------|-----|--------------------|---------------------------------------------------------------------------------------------------------------------------------------------------|--------------------------------------------------------------------------------------|----------------------------|
| 1  | Bennell, Kyriakides [59], 2014; RCT | 78  | Hip and/or knee OA | CG: exercise sessions + tailored home exercises; IG: CG + booster sessions (review of exercises, discussion/plans to increase adherence)          | No difference compared to the control group (24 weeks)                               | Unclear RoB                |
| 2  | Cochrane, Davey [60], 2007; RCT     | 104 | OA                 | Cost free program versus fee-based programs                                                                                                       | Cost free program had a 53% adherence rate versus only 19% when patients had to pay. | Not assessed in the review |
| 3  | Lysack, Dama [61], 2005; RCT        | 40  | OA                 | Computer-assisted video instruction vs conventional inpatient education                                                                           | No difference compared to the control group (4 weeks)                                | Not reported in the review |
| 4  | Talbot, Gaines [62], 2003; RCT      | 34  | Knee OA            | Pedometer-based intervention (Walk + individualized instruction and the goal of increasing their step count by 30%) vs. education group only (CG) | Adherence to treatment increased (12, 24 weeks)                                      | Low quality                |
| 5  | Tüzün, Cifcili [63], 2012; RCT      | 64  | Hip and/or knee OA | CG: individual sessions with a PT + verbal explanation of home exercises; IG: CG, + demonstration and coaching of performing exercises            | NS after 4 weeks (self report), sig. after 12 weeks                                  | Unclear RoB                |

**Table 14. Reviews used for PICO 1: Adherence to visits**

| No | Review; year            | Studies | Diseases                         | Interventions                                                                                                                                                                                           | Assessments                              |
|----|-------------------------|---------|----------------------------------|---------------------------------------------------------------------------------------------------------------------------------------------------------------------------------------------------------|------------------------------------------|
| 1  | Taneja, Su'a [13], 2014 | 6 RCTs  | 3 RA<br>1 breast cancer<br>2 IBD | Patient-initiated follow up (PIFU): An initiative that allows patients to initiate hospital follow-up appointments on an 'as required' basis compared with the traditional 'physician-initiated' model. | Pain, costs, satisfaction, self-efficacy |

**Table 15. Studies on Patient-Initiated Follow Up (single) to increase Adherence to Visits**

| No | Study/Design                                                                                                     | N   | Diag.                                       | Intervention/Control                                                                                                                               | Results                                                                                                                                                                                                                                                                                                                                                                                                                              | RoB                                 |
|----|------------------------------------------------------------------------------------------------------------------|-----|---------------------------------------------|----------------------------------------------------------------------------------------------------------------------------------------------------|--------------------------------------------------------------------------------------------------------------------------------------------------------------------------------------------------------------------------------------------------------------------------------------------------------------------------------------------------------------------------------------------------------------------------------------|-------------------------------------|
| 1  | Hewlett, Mitchell [64], 2000; RCT<br><br>Kirwan, Mitchell [65], 2003; RCT<br><br>Hewlett, Kirwan [66], 2005; RCT | 209 | RA, extension of the same randomized cohort | IG: no routine hospital review but rapid access on request; CG: patients received routine, rheumatologist-initiated planned follow-up appointments | Had significantly less pain at 24 months with 3.9 cm on a 10 cm VAS compared with 4.8 cm for the CG (P < 0.05); Less resources per patient were required (£ 208 vs £ 313 for controls, P < 0.001); Patients were more confident in their system of care at 6, 9, 12, 18, 21 and 24 months of follow up (P < 0.01 to P < 0.001)<br><br>No clinical differences in the long-term, but greater self-efficacy and satisfaction with care | Not reported for individual studies |

**Table 16. Summary.**

The numbers indicate the count of the studies. Numbers followed with a "+" indicate significant increase in adherent behaviour, "-" means no increase in adherent behaviour, and "~" means unclear results.

|            | Diag.     | Educational | Behavioural | CBT | Motivational | Exercise class | Multicomponent | Other |
|------------|-----------|-------------|-------------|-----|--------------|----------------|----------------|-------|
| Medication | RA        | 3+/3-       | 1+/1-       | 1+  |              |                | 2+             | 1~    |
|            | SLE       | 1+          | 1-          |     |              |                |                |       |
|            | Psoriasis |             |             |     |              |                | 1+             |       |
|            | OP        |             |             |     |              |                |                | 1~/1- |
|            | Total     | 4+/3-       | 1+/2-       | 1+  |              |                | 3+             | 2~/1- |
| Exercise   | OA        | 2+/4-       | 3-          |     | 1+           | 2+/1-          |                | 3+/2- |
|            | RA        | 2+          | 3+/2-       |     |              |                | 3~             |       |
|            | Mixed     | 1+          | 1+          |     |              |                |                |       |
|            | CBP       |             | 1~          |     | 1+           |                | 1+             |       |
|            | Total     | 5+/4-       | 4+/1~/5-    |     | 2+           | 2+/1-          | 1+/3~          | 3+/2- |
| Visits     | RA        |             |             |     |              |                |                | 3+    |
|            | SLE       |             |             |     |              |                |                |       |
|            | Total     |             |             |     |              |                |                | 3+    |

## REFERENCES

1. Depont F, Berenbaum F, Filippi J, et al. Interventions to Improve Adherence in Patients with Immune-Mediated Inflammatory Disorders: A Systematic Review. *PLoS ONE* 2015;10(12):e0145076.
2. Galo JS, Mehat P, Rai SK, et al. What are the effects of medication adherence interventions in rheumatic diseases: a systematic review. *Annals of the rheumatic diseases* 2015;annrheumdis-2014-206593.
3. Ganguli A, Clewell J, Shillington AC. The impact of patient support programs on adherence, clinical, humanistic, and economic patient outcomes: a targeted systematic review. *Patient preference and adherence* 2016;10:711.
4. Nieuwlaat R, Wilczynski N, Navarro T, et al. Interventions for enhancing medication adherence. *Cochrane database of systematic reviews* 2014;(11).
5. Baillet A, Zeboulon N, Gossec L, et al. Efficacy of cardiorespiratory aerobic exercise in rheumatoid arthritis: meta-analysis of randomized controlled trials. *Arthritis care & research* 2010;62(7):984-992.
6. Ezzat AM, MacPherson K, Leese J, et al. The effects of interventions to increase exercise adherence in people with arthritis: a systematic review. *Musculoskeletal Care* 2015;13(1):1.
7. Gay C, Chabaud A, Guilley E, et al. Educating patients about the benefits of physical activity and exercise for their hip and knee osteoarthritis. Systematic literature review. *Annals of physical and rehabilitation medicine* 2016;59(3):174-183.
8. Hammond A, Prior Y. The effectiveness of home hand exercise programmes in rheumatoid arthritis: a systematic review. *British medical bulletin* 2016;119(1):49-62.

9. Jansons PS, Haines TP, O'Brien L. Interventions to achieve ongoing exercise adherence for adults with chronic health conditions who have completed a supervised exercise program: systematic review and meta-analysis. *Clinical rehabilitation* 2017;31(4):465-477.
10. Larkin L, Gallagher S, Cramp F, et al. Behaviour change interventions to promote physical activity in rheumatoid arthritis: a systematic review. *Rheumatology international* 2015;35(10):1631-1640.
11. Mazieres B, Thevenon A, Coudeyre E, et al. Adherence to, and results of, physical therapy programs in patients with hip or knee osteoarthritis. Development of French clinical practice guidelines. *Joint Bone Spine* 2008;75(5):589-596.
12. Nicolson PJ, Bennell KL, Dobson FL, et al. Interventions to increase adherence to therapeutic exercise in older adults with low back pain and/or hip/knee osteoarthritis: a systematic review and meta-analysis. *Br J Sports Med* 2017;bjsports-2016-096458.
13. Taneja A, Su'a B, Hill A. Efficacy of patient-initiated follow-up clinics in secondary care: a systematic review. *Internal Medicine Journal* 2014;44(12a):1156-1160.
14. Clifford S, Barber N, Elliott R, et al. Patient-centred advice is effective in improving adherence to medicines. *Pharmacy World and Science* 2006;28(3):165.
15. Hill J, Bird H, Johnson S. Effect of patient education on adherence to drug treatment for rheumatoid arthritis: a randomised controlled trial. *Ann Rheum Dis* 2001;60(9):869-875.
16. Homer D, Nightingale P, Jobanputra P. Providing patients with information about disease-modifying anti-rheumatic drugs: Individually or in groups? A pilot randomized controlled trial comparing adherence and satisfaction. *Musculoskeletal Care* 2009;7(2):78-92.
17. Brus HLM, van de Laar MAFJ, Taal E, et al. Effects of patient education on compliance with basic treatment regimens and health in recent onset active rheumatoid arthritis. *Annals of the Rheumatic Diseases* 1998;57(3):146-151.
18. Conn DL, Pan Y, Easley KA, et al. The effect of the Arthritis Self-Management Program on outcome in African Americans with rheumatoid arthritis served by a public hospital. *Clinical rheumatology* 2013;32(1):49-59.
19. Ravindran V, Jadhav R. The effect of rheumatoid arthritis disease education on adherence to medications and followup in Kerala, India. *J Rheumatol* 2013;40(8):1460-1461.
20. Ganachari M, Almas SA. Evaluation of clinical pharmacist mediated education and counselling of systemic lupus erythematosus patients in tertiary care hospital. *Indian Journal of Rheumatology* 2012;7(1):7-12.
21. El Miedany Y, El Gaafary M, Palmer D. Assessment of the utility of visual feedback in the treatment of early rheumatoid arthritis patients: a pilot study. *Rheumatol Int* 2012;32(10):3061-3068.
22. van den Bemt BJJ, den Broeder AA, van den Hoogen FHJ, et al. Making the rheumatologist aware of patients' non-adherence does not improve medication adherence in patients with rheumatoid arthritis. *Scandinavian journal of rheumatology* 2011;40(3):192-196.
23. Ting TV, Kudalkar D, Nelson S, et al. Usefulness of cellular text messaging for improving adherence among adolescents and young adults with systemic lupus erythematosus. *The Journal of rheumatology* 2012;39(1):174-179.
24. Evers AW, Kraaimaat FW, van Riel PL, et al. Tailored cognitive-behavioral therapy in early rheumatoid arthritis for patients at risk: a randomized controlled trial. *Pain* 2002;100(1-2):141-153.
25. Balato N, Megna M, Di Costanzo L, et al. Educational and motivational support service: a pilot study for mobile-phone-based interventions in patients with psoriasis. *British journal of dermatology* 2013;168(1):201-205.
26. El Miedany Y, El Gaafary M, El Arousy N, et al. Arthritis education: the integration of patient-reported outcome measures and patient self-management. *Clin Exp Rheumatol* 2012;30(6):899-904.
27. McEvoy Devellis B, Blalock SJ, Hahn PM, et al. Evaluation of a problem-solving intervention for patients with arthritis. *Patient Education and Counseling* 1988;11(1):29-42.
28. Lai PSM, Chua SS, Chan SP. Impact of pharmaceutical care on knowledge, QoL and satisfaction of postmenopausal women with osteoporosis. *International journal of clinical pharmacy* 2013;35(4):629-637.
29. Solomon DH, Iversen MD, Avorn J, et al. Osteoporosis telephonic intervention to improve medication regimen adherence: a large, pragmatic, randomized controlled trial. *Archives of internal medicine* 2012;172(6):477-483.
30. Stockl KM, Shin JS, Lew HC, et al. Outcomes of a rheumatoid arthritis disease therapy management program focusing on medication adherence. *J Manag Care Pharm* 2010;16(8):593-604.
31. Bossen D, Veenhof C, Van Beek KE, et al. Effectiveness of a web-based physical activity intervention in patients with knee and/or hip osteoarthritis: randomized controlled trial. *Journal of medical Internet research* 2013;15(11):e257.
32. Farr JN, Going SB, McKnight PE, et al. Progressive resistance training improves overall physical activity levels in patients with early osteoarthritis of the knee: a randomized controlled trial. *Physical therapy* 2010;90(3):356-366.
33. Fries J, Carey C, McShane D. Patient education in arthritis: randomized controlled trial of a mail-delivered program. *The Journal of rheumatology* 1997;24(7):1378-1383.
34. Halbert J, Crotty M, Weller D, et al. Primary care-based physical activity programs: effectiveness in sedentary older patients with osteoarthritis symptoms. *Arthritis Care & Research: Official Journal of the American College of Rheumatology* 2001;45(3):228-234.
35. Mayoux-Benhamou A, Giraudet-Le Quintrec J-S, Ravaud P, et al. Influence of patient education on exercise compliance in rheumatoid arthritis: a prospective 12-month randomized controlled trial. *The Journal of rheumatology* 2008;35(2):216-223.

36. Ravaud P, Flipo R, Boutron I, et al. ARTIST (osteoarthritis intervention standardized) study of standardised consultation versus usual care for patients with osteoarthritis of the knee in primary care in France: pragmatic randomised controlled trial. *Bmj* 2009;338:b421.
37. Schoo AMM, Morris M, Bui Q. The effects of mode of exercise instruction on compliance with a home exercise program in older adults with osteoarthritis. *Physiotherapy* 2005;91(2):79-86.
38. Williams NH, Amoakwa E, Belcher J, et al. Activity Increase Despite Arthritis (AIDA): phase II randomised controlled trial of an active management booklet for hip and knee osteoarthritis in primary care. *Br J Gen Pract* 2011;61(589):e452-e458.
39. Basler HD, Bertalanffy H, Quint S, et al. TTM-based counselling in physiotherapy does not contribute to an increase of adherence to activity recommendations in older adults with chronic low back pain—A randomised controlled trial. *European Journal of Pain* 2007;11(1):31-31.
40. Brosseau L, Wells GA, Kenny GP, et al. The implementation of a community-based aerobic walking program for mild to moderate knee osteoarthritis (OA): a knowledge translation (KT) randomized controlled trial (RCT): Part I: The Uptake of the Ottawa Panel clinical practice guidelines (CPGs). *BMC public health* 2012;12(1):871.
41. Frost KL. Influence of a motivational exercise counseling intervention on rehabilitation outcomes in individuals with arthritis who received total hip replacement: University of Pittsburgh; 2004.
42. Huffman KM, Sloane R, Peterson MJ, et al. The impact of self-reported arthritis and diabetes on response to a home-based physical activity counselling intervention. *Scandinavian journal of rheumatology* 2010;39(3):233-239.
43. John H, Hale ED, Treharne GJ, et al. A randomized controlled trial of a cognitive behavioural patient education intervention vs a traditional information leaflet to address the cardiovascular aspects of rheumatoid disease. *Rheumatology* 2013;52(1):81-90.
44. Knittle K, De Gucht V, Hurkmans E, et al. Targeting motivation and self-regulation to increase physical activity among patients with rheumatoid arthritis: a randomised controlled trial. *Clinical rheumatology* 2015;34(2):231-238.
45. O'Brien D, Bassett S, McNair P. The effect of action and coping plans on exercise adherence in people with lower limb osteoarthritis: a feasibility study. *NZJ Physiother* 2013;41(2):49-57.
46. Van den Berg M, Runday H, Peeters A, et al. Using internet technology to deliver a home-based physical activity intervention for patients with rheumatoid arthritis: A randomized controlled trial. *Arthritis Care & Research: Official Journal of the American College of Rheumatology* 2006;55(6):935-945.
47. Hurkmans EJ, Van den Berg MH, Runday KH, et al. Maintenance of physical activity after Internet-based physical activity interventions in patients with rheumatoid arthritis. *Rheumatology* 2010;49(1):167-172.
48. Hughes SL, Seymour RB, Campbell RT, et al. Long-term impact of Fit and Strong! on older adults with osteoarthritis. *The Gerontologist* 2006;46(6):801-814.
49. McCarthy C, Mills P, Pullen R, et al. Supplementation of a home-based exercise programme with a class-based programme for people with osteoarthritis of the knees: a randomised controlled trial and health economic analysis. *Health Technology Assessment (Winchester, England)* 2004;8:2015.
50. Pisters MF, Veenhof C, de Bakker DH, et al. Behavioural graded activity results in better exercise adherence and more physical activity than usual care in people with osteoarthritis: a cluster-randomised trial. *Journal of physiotherapy* 2010;56(1):41-47.
51. Brodin N, Eurenus E, Jensen I, et al. Coaching patients with early rheumatoid arthritis to healthy physical activity: a multicenter, randomized, controlled study. *Arthritis Care & Research* 2008;59(3):325-331.
52. Sjöquist ES, Brodin N, Lampa J, et al. Physical activity coaching of patients with rheumatoid arthritis in everyday practice: A long-term follow-up. *Musculoskeletal care* 2011;9(2):75-85.
53. Hughes SL, Seymour RB, Campbell RT, et al. Fit and strong: bolstering maintenance of physical activity among older adults with lower-extremity osteoarthritis. *American journal of health behavior* 2010;34(6):750-763.
54. Vong SK, Cheing GL, Chan F, et al. Motivational enhancement therapy in addition to physical therapy improves motivational factors and treatment outcomes in people with low back pain: a randomized controlled trial. *Archives of physical medicine and rehabilitation* 2011;92(2):176-183.
55. Friedrich M, Gittler G, Halberstadt Y, et al. Combined exercise and motivation program: effect on the compliance and level of disability of patients with chronic low back pain: a randomized controlled trial. *Archives of physical medicine and rehabilitation* 1998;79(5):475-487.
56. Lamb SE, Williamson EM, Heine PJ, et al. Exercises to improve function of the rheumatoid hand (SARAH): a randomised controlled trial. *The Lancet* 2015;385(9966):421-429.
57. Manning VL, Hurley MV, Scott DL, et al. Education, self-management, and upper extremity exercise training in people with rheumatoid arthritis: A randomized controlled trial. *Arthritis care & research* 2014;66(2):217-227.
58. O'Brien A, Jones P, Mullis R, et al. Conservative hand therapy treatments in rheumatoid arthritis—a randomized controlled trial. *Rheumatology* 2006;45(5):577-583.
59. Bennell KL, Kyriakides M, Hodges PW, et al. Effects of two physiotherapy booster sessions on outcomes with home exercise in people with knee osteoarthritis: a randomized controlled trial. *Arthritis care & research* 2014;66(11):1680-1687.
60. Cochrane T, Davey R, Matthes SE. Randomised controlled trial of the cost-effectiveness of water-based therapy for lower limb osteoarthritis. 2007.
61. Lysack C, Dama M, Neufeld S, et al. Compliance and satisfaction with home exercise: a comparison of computer-assisted video instruction and routine rehabilitation practice. *Journal of allied health* 2005;34(2):76-82.

62. Talbot LA, Gaines JM, Huynh TN, et al. A home-based pedometer-driven walking program to increase physical activity in older adults with osteoarthritis of the knee: a preliminary study. *Journal of the American Geriatrics Society* 2003;51(3):387-392.
63. Tüzün S, Cifcili S, Akman M, et al. How can we improve adherence to exercise programs in patients with osteoarthritis?: A randomized controlled trial. *Turkish Journal of Geriatrics* 2012;15(3).
64. Hewlett S, Mitchell K, Haynes J, et al. Patient-initiated hospital follow-up for rheumatoid arthritis. *Rheumatology* 2000;39(9):990-997.
65. Kirwan JR, Mitchell K, Hewlett S, et al. Clinical and psychological outcome from a randomized controlled trial of patient-initiated direct-access hospital follow-up for rheumatoid arthritis extended to 4 years. *Rheumatology* 2003;42(3):422-426.
66. Hewlett S, Kirwan J, Pollock J, et al. Patient initiated outpatient follow up in rheumatoid arthritis: six year randomised controlled trial. *bmj* 2005;330(7484):171.
67. Greenley RN, Kunz JH, Walter J, et al. Practical strategies for enhancing adherence to treatment regimen in inflammatory bowel disease. *Inflammatory bowel diseases* 2013;19(7):1534-1545.

Tables:

|                                                                                                                         |    |
|-------------------------------------------------------------------------------------------------------------------------|----|
| Table 1. Reviews used for PICO 1: Adherence to pharmacological interventions                                            | 3  |
| Table 2. Studies on Educational Interventions (single) to Increase Adherence to Pharmacological Interventions           | 4  |
| Table 3. Studies on Behavioural Interventions (single) to Increase Adherence to Pharmacological Interventions           | 4  |
| Table 4. Studies on Cognitive Behavioural Interventions (single) to Increase Adherence to Pharmacological Interventions | 4  |
| Table 5. Studies on Multicomponent Interventions to Increase Adherence to Pharmacological Interventions                 | 5  |
| Table 6. Studies on Other Interventions to Increase Adherence to Pharmacological Interventions                          | 5  |
| Table 7. Reviews used for PICO 1: (Non-)Adherence to exercise/physical activity                                         | 5  |
| Table 8. Educational/ Knowledge-Based Interventions to Increase Adherence to Exercises/Physical Activity                | 6  |
| Table 9. Behavioural Interventions to Increase Adherence to Exercises/Physical Activity                                 | 7  |
| Table 10. Exercise Class Based Interventions to Increase Adherence to Exercises/Physical Activity                       | 8  |
| Table 11. Motivational Based Interventions to Increase Adherence to Exercises/Physical Activity                         | 8  |
| Table 12. Multicomponent Interventions to Increase Adherence to Exercises/Physical Activity                             | 9  |
| Table 13. Other Interventions to Increase Adherence to Exercises/Physical Activity                                      | 9  |
| Table 14. Reviews used for PICO 1: (Non-)adherence to visits                                                            | 9  |
| Table 15. Studies on Patient-Initiated Follow Up (single) to increase Adherence to Visits                               | 10 |
| Table 16. Summary.                                                                                                      | 10 |
