# Supplementary material for: Prevention, screening, assessing and managing of non-adherent behaviour in people with rheumatic and musculoskeletal diseases: systematic reviews informing the 2020 EULAR points to consider
Source: PubMed Central journal article supplement — RMD Open. 2020 Nov 9;6(3):e001432. doi: 10.1136/rmdopen-2020-001432 (PMC7856118; doi:10.1136/rmdopen-2020-001432), 2020-11-09
Supplement: rmdopen-2020-001432supp004.pdf [file rmdopen-2020-001432supp004.pdf]

## Supplement\_D\_PICO\_3

### What is the impact of shared decision-making (SDM) and of effective communication on adherence?

No evidence was found specifically on the impact on shared decision making (SDM) and on effective communication on adherence. However, evidence was found on the impact on patient education as defined by the EULAR guideline on patient education[1].

Patient education (PE) was defined by the EULAR Taskforce for the *EULAR recommendations for patient education for people with inflammatory arthritis* as a "planned interactive learning process designed to support and enable people to manage their life with inflammatory arthritis and optimise their health and well-being." [1] They further argue that communication and shared decision making is essential for effective patient education [1]. PE includes a wide range of interventions/activities: provision of knowledge/information, written material, e-health, self-management programmes, cognitive behavioural interventions, mindfulness, stress management, individual consultations, sharing experiences among patients, motivational discussions, exercise counselling, lifestyle change interventions and self-help courses. [1, 2]

Therefore, we summarized the impact of PE on adherence.

#### Summary

In total, 5 systematic reviews, including 51 studies explored the association between PE, adherence and RMDs (see table 1 for details). Eleven studies had a positive impact on adherence (7 studies [3-9] on medication adherence; 4 on non-pharmacological/exercise adherence [10-13]), 9 studies did show positive, but not statistically significant effect (5 studies [13-17] on medication adherence, 4 on non-pharmacological/exercise adherence [18-21]). The rest of the primary studies included in the five systematic reviews (n=31) were excluded due to: communication was only a small part of the intervention [22, 23], the authors focused on other interventions (e.g. cognitive-behavioural) without a clear communicative part [24], text messages were only used as reminders [25], leaflets were used without other communicative elements [26], intervention focused only on rheumatologists [27], the intervention focused on health literacy only [28], the study design was not appropriate [29-31], adherence was not explicitly measured as the outcome of the study [32-47], or the study did not focus on RMDs (ulcerative colitis [48-52], inflammatory bowel diseases [53]). A list of excluded studies can be seen in appendix III.

#### Medication adherence

Of the 12 included studies regarding medication adherence, patients were diagnosed with rheumatoid arthritis (RA) [4-7, 13-16], osteoporosis [17], psoriasis [3, 14], systemic lupus erythematosus (SLE) [8], juvenile rheumatoid arthritis (JRA) [9]. As described in the definition of Zangi, Ndosi [1] and Chewing, Bylund [2] the interventions/activities used to provide PE varied greatly, such as daily text messages to provide reminders and education [3], information and written materials [4, 6], visualization of charts showing the disease progression [5], discussion/review of PROMs [6], behavioral strategies and discussion [9], counseling and advisory [17], (motivational) interviewing [15, 16].

Seven of these studies had a positive impact on medication adherence using an educational approach [3-8], five did not reach significance on medication adherence [13-17]: (1) In the review of Depont, Berenbaum [54] and Galo, Mehat [55] it is argued, that Brus, Van De Laar [13] lacked power [54, 55], and further, the people included in the study had an active, recent-onset RA, and people with high disease activity tend to be more adherent than those with low disease activity [13, 55]. (2) Homer, Nightingale [14] did not investigate whether PE per se is effective, but compared individual and group setting to deliver PE. This did not result in a significant difference, but the results were in favour of group settings (p=0.06). Moreover, the study had serious limitations (lack of power) [54]. (3) In the study of Zwikker, van den Ende [15] pharmacist-delivered motivational interviewing-guided group sessions were evaluated. The aim was to improve patients' balance between necessity and concern beliefs about medication to have a positive influence on medication taking. The intervention did not reach statistical significance, and it was suggested that the reason was that the included patients had a long disease duration (>14 years), and thereby a long experience with their medication. This is also discussed in another RCT where it is argued, that modifying adherence/adherent behaviour in patients with a disease duration that long may be harder than forming new behaviour in recently diagnosed patients [28, 55]. (4) In the study from McEvoy Devellis, Blalock [16] the control group did not get a placebo (the group was not intervention-naïve), which may be attributed to

unintended positive effects and may have contributed to lack of differences in outcomes[16, 55]. (5) Solomon, Iversen [17] argue in their study, that the sample size was calculated based on a 10% increase in medication regimen adherence. The increase of adherence was of 8%, thus the trial did not reach significance ( $p=0.07$ ). They further argue, that they were able to achieve modest improvements in medication adherence using a relatively simple intervention[17].

## **Exercise adherence**

Of the 8 included studies regarding exercise adherence, patients were diagnosed with osteoarthritis[10, 12, 18, 20, 21], low back pain[11] [19], and RA[13]. Similar to the strategies used to enhance medication adherence, the interventions/activities used to provide PE varied for exercise adherence too: consultation[10, 13, 19, 20], motivational approaches[11], physical activity advice[12], [18] and verbal (recorded tapes) and visualised (videos) cues to prompt correct performance of exercises[21] were used.

Four of these studies had a positive impact on exercise adherence[10-13], the others did not reach significance[18-21]: The study of O'Brien, Bassett [18] had lack of power (intervention group 17 participants, control group 10) and further, they argue that no effect is found due to because the fact that long-term exercise programmes contribute to a poor level of adherence and further, the questionnaires used may not be significant because of a ceiling effect in the scores. The questionnaires were reported to have limited sensitivity (e.g. Sport Injury Rehabilitation Adherence Scale (SIRA)). The activities were rated moderate to high, ranging from 3.4 to 4.6 out of a possible 5. The studies from Basler, Bertalanffy [19], Bennell, Kyriakides [20] and Schoo, Morris [21] included non-placebo control groups: 10 sessions with physiotherapist over 5 weeks plus tailored home exercise programme[19], up to 14 individual exercise sessions with a physiotherapist plus advice to continue with unsupervised home exercise programme[20], and 3 individual sessions with a physiotherapist consisting of face-to-face verbal instruction on the performance of home exercises and a brochure of the exercises[21]. This interventions performed in the control groups may have attributed to unintended positive effects and may have contributed to lack of differences in outcomes.

Table 1. Individual studies exploring effective communication and SDM components of interventions proven effective.

| Study, Design, med/non-pharma                     | Review                   | Dig., IG, CG              | Intervention                                                                                                                                                                                                                                                                                                                                          | Outcome measures                                                                                                                                                                                                                                                                                | Results                                                                                                                                                                                                                                                                                                                                                                                                                  |
|---------------------------------------------------|--------------------------|---------------------------|-------------------------------------------------------------------------------------------------------------------------------------------------------------------------------------------------------------------------------------------------------------------------------------------------------------------------------------------------------|-------------------------------------------------------------------------------------------------------------------------------------------------------------------------------------------------------------------------------------------------------------------------------------------------|--------------------------------------------------------------------------------------------------------------------------------------------------------------------------------------------------------------------------------------------------------------------------------------------------------------------------------------------------------------------------------------------------------------------------|
| Studies on medication adherence                   |                          |                           |                                                                                                                                                                                                                                                                                                                                                       |                                                                                                                                                                                                                                                                                                 |                                                                                                                                                                                                                                                                                                                                                                                                                          |
| Balato, Megna [3]; Pilot RCT; medication          | Depon t, Beren baum [54] | Psoriasis IG n=20 CG n=20 | IG: Daily text messages (TM), providing reminders and educational tools<br>CG: not clear                                                                                                                                                                                                                                                              | Adherence: participants were asked how often they forgot to use psoriasis products/medications in term of days per week in the last week.                                                                                                                                                       | Adherence to therapy improved significant (3.86 to 6.46 days per week P<.001) whereas it remained stable in the control group.                                                                                                                                                                                                                                                                                           |
| Hill, Bird [4]; RCT; medication                   | Depon t, Beren baum [54] | RA IG n=51 CG n=49        | IG: patient education programme: information about the types of drugs used for RA, the disease process, physical exercise, joint protection, pain control, and coping strategies. Written information, including a DPA drug information leaflet developed especially for the study, was provided as back up.<br>CG: same DPA drug information leaflet | primary measure of adherence was by pharmacological marker (dosage of DPA) (The ratio of phenobarbitone level in the blood to prescribed dose (LDR) was calculated for each patient at each study visit: (phenobarbitone concentration (mg/l))/(daily phenobarbitone dose (mg/kg body weight)). | pharmacological marker showed the EG to be significantly more adherent on more occasions than the CG (p<0.05). Patterns of adherence over time showed that at 12 weeks 86% (38/44) of those in the EG compared with 64% (29/45) of the CG remained adherent (p=0.01). These trends continued and by the end of the study, 85% (29/34) of the EG compared with 55% (23/42) of the CG were taking their DPA as prescribed. |
| EI Miedany, EI Gaafary [5]; Pilot RCT; medication | Depon t, Beren baum [54] | Early RA IG n=55 CG n=56  | IG: visual feedback facility (visualization of computer charts showing the disease progression)<br>CG: Usual care                                                                                                                                                                                                                                     | Primary outcome: change in the patients' adherence to their medications                                                                                                                                                                                                                         | Adherence: IG 47/54 (87%) patients were adherent to their drug therapy, whereas 23/54 (43%) in CG to their drug therapy (P < 0.01).                                                                                                                                                                                                                                                                                      |
| EI Miedany, EI Gaafary [6]; RCT; medication       | Depon t, Beren baum [54] | RA IG n=74 CG n=73        | IG: Joint-fitness programme combined with discussion/review of PROMs and patient education; The programme includes 4 main components: a) educational – joint-learn, b) behavioural – joint-change, c) information – joint act and d) joint-cise (joint-exercise).<br>CG: usual care                                                                   | At 3, 12 and 18 months: The primary outcome was the change in the patients' adherence to their medications                                                                                                                                                                                      | improvement of the patients' adherence to therapy: 66/74 (89.1%) patients in group I were adherent to their drug therapy in comparison to 47/73 (64.4%) in group II (p<0.01).                                                                                                                                                                                                                                            |

| Study, Design, med/non-pharma            | Review                | Dig., IG, CG                                        | Intervention                                                                                                                                                                                                                                                                                                                                                                                                                                                                                                                                                                                                                                           | Outcome measures                                                                                                                          | Results                                                                                                                                                                                                                                                                               |
|------------------------------------------|-----------------------|-----------------------------------------------------|--------------------------------------------------------------------------------------------------------------------------------------------------------------------------------------------------------------------------------------------------------------------------------------------------------------------------------------------------------------------------------------------------------------------------------------------------------------------------------------------------------------------------------------------------------------------------------------------------------------------------------------------------------|-------------------------------------------------------------------------------------------------------------------------------------------|---------------------------------------------------------------------------------------------------------------------------------------------------------------------------------------------------------------------------------------------------------------------------------------|
| Clifford, Barber [7]; RCT; medication    | Galo, Mehat [55]      | RA<br>IG n=261<br>CG n=239                          | IG: telephone-based, patient-tailored pharmacy advisory service delivered by community pharmacists to elderly patients which included RA. The pharmacist gave information, advice or reassurance in response to the patients' expressed needs.<br>CG: usual care                                                                                                                                                                                                                                                                                                                                                                                       | Primary Outcome: Incidence of non-adherence                                                                                               | non-adherence significantly lower in the intervention group (9% vs. 16%, P = 0.032)                                                                                                                                                                                                   |
| Ganachari and Almas [8]; RCT; medication | Galo, Mehat [55]      | SLE<br>IG n=21<br>CG n=20                           | IG: education regarding SLE and its management by a clinical pharmacist: including lifestyle modifications, via the distribution of patient information<br>CG: usual care                                                                                                                                                                                                                                                                                                                                                                                                                                                                              | Medication Adherence Questionnaire                                                                                                        | mean medication adherence score increase in the IC from 3.0 to 5.8 at post-counselling and was also significantly better when compared with the CG (4.6).                                                                                                                             |
| Rapoff, Belmont [9]; RCT; medication     | Galo, Mehat [55]      | Juvenile Rheumatoid Arthritis<br>IG n=19<br>CG n=15 | IG: educational and behavioral strategies for enhancing adherence: 10-min audiovisual program and received a booklet which described adherence-enhancement strategies: cueing (e.g., pairing medication taking with an established behavior such as brushing teeth), monitoring (e.g., using a calendar to track medication taking), positive reinforcement (e.g., praising and rewarding with tokens that are exchanged for special privileges), and discipline (e.g., using time-out for defiant refusals to take medications). The nurse reviewed and rehearsed strategies, gave answers to questions.<br>CG: received a general educational on JRA | Adherence: Medication Event Monitoring System (MEMS) (=electronic medication bottle cap records the date and time of each bottle opening) | significant differences in adherence as measured by Medication Event Monitoring Systems between the intervention and control groups (77.7±21.5 vs 56.9±33.0, p=0.02).                                                                                                                 |
| Homer, Nightingale [14] RCT; medication  | Depon, Berenbaum [54] | RA or psoriatic arthritis<br>IG n=32<br>CG n=30     | IG: individual information about disease-modifying anti-rheumatic drugs<br>CG: information about disease-modifying anti-rheumatic drugs in groups                                                                                                                                                                                                                                                                                                                                                                                                                                                                                                      | The primary outcome was adherence with medication use, ascertained by pill counts, self-report diaries and prescription dispensation.     | More patients counselled in groups were adherent (27/30; 90%) compared with patients counselled individually (22/32; 69%; p = 0.06) by pill counts, on self-report diaries, similar proportions were adherent (group counselling 97% (29/30) versus individual 94% (30/32); p = 1.0). |
| Brus, Van De Laar [13] RCT; medication   | Depon, Berenbaum [54] | RA<br>IG n=25<br>CG n=30                            | IC: education programme focused on compliance with sulphasalazine therapy, physical exercises, endurance activities (walking, swimming, bicycling), advice on energy conservation, and joint protection                                                                                                                                                                                                                                                                                                                                                                                                                                                | number of tablets prescribed and the number of tablets obtained                                                                           | In the first quarter compliance with sulphasalazine in the educated patients was 91 (12)% (mean (SD)). In the controls compliance was 87 (22)%. In the second quarter, compliance was 82 (22)% and 82 (28)% respectively. During the third and                                        |

| Study, Design, med/non-pharma              | Review                | Dig., IG, CG                           | Intervention                                                                                                                                                                                                                                                      | Outcome measures                                                                                                                                                            | Results                                                                                                                                                                                                                                                                                                            |
|--------------------------------------------|-----------------------|----------------------------------------|-------------------------------------------------------------------------------------------------------------------------------------------------------------------------------------------------------------------------------------------------------------------|-----------------------------------------------------------------------------------------------------------------------------------------------------------------------------|--------------------------------------------------------------------------------------------------------------------------------------------------------------------------------------------------------------------------------------------------------------------------------------------------------------------|
|                                            |                       |                                        |                                                                                                                                                                                                                                                                   |                                                                                                                                                                             | fourth quarter compliance rates were 89 (16)% and 84 (21)% respectively. There were no statistically significant differences between the groups in any of these periods. After one year, 60% (n=15) of the patients in the experimental group and 76% (n=23) in the control group were still using sulphasalazine. |
| Zwikker, van den Ende [15]; RCT; mediation | Galo, Mehat [55]      | RA<br>IG n=63<br>IG n=60               | IG: The intervention consisted of two motivational interviewing (MI) guided [27] group sessions regarding beliefs and concern beliefs about medication and to resolve practical barriers to medication taking.<br>CG: received brochures at home about the DMARDs | Compliance Questionnaire Rheumatology, Medication Adherence Report Scale, pharmacy refill data                                                                              | No differences in medication non-adherence were detected between the intervention and control arm CQR, OR 1.3 (95%CI 0.5, 3.3); MARS OR 1.7 (95%CI 0.8, 3.8), Refill: IC 96.6%; CG 102.0% mean difference 2.2% (95% CI -11.1%, 15.6%)                                                                              |
| McEvoy Devellis, Blalock [16]              | Galo, Mehat [55]      | RA<br>IG: n=51<br>CG n=50              | IG: psychological interviews and problem-solving intervention<br>CG: psychological interviews                                                                                                                                                                     | Adherence: questionnaire: the time they had missed doing the behaviour during the past month, and the number of times they had missed doing the behaviour in the past week. | Authors cited no significant difference between groups, though did not report data.                                                                                                                                                                                                                                |
| Solomon, Iversen [17]                      | Ganguli, Clewell [56] | Orstoporoses<br>IG n=1046<br>CG n=1041 | IG: telephone-based counselling with a motivational interviewing framework<br>CG: mailed educational materials                                                                                                                                                    | Medication adherence: medication possession ratio, calculated as the ratio of days with filled prescriptions to total days of follow-up.                                    | The groups were balanced at baseline, with a mean age of 78 years; 93.8% were female. In an intention-to-treat analysis, median adherence was 49% (interquartile range, 7%-88%) in the intervention arm and 41% (2%-86%) in the control arm (P = .07, Kruskal-Wallis test).                                        |
| <b>Studies on exercise adherence</b>       |                       |                                        |                                                                                                                                                                                                                                                                   |                                                                                                                                                                             |                                                                                                                                                                                                                                                                                                                    |
| Ravaud, Flipo [10]; RCT;                   | Ezzat, MacPh          | OA/knee,<br>IG n=154<br>CG n=182       | IG: Standardised consultation during three goal-oriented visits: education on osteoarthritis and treatment                                                                                                                                                        | time spent on physical exercises (Baecke index)                                                                                                                             | physical activity score (mean 0.20 (0.65) vs 0.04 (0.78); P=0.013)                                                                                                                                                                                                                                                 |

| Study, Design, med/non-pharma                      | Reviewer                 | Dig., IG, CG                        | Intervention                                                                                                                                                                                                                                                                                                                                                                                                                                                                                                                                                                        | Outcome measures                                                                                                                                                                                      | Results                                                                                                                                                                                                                                                                                                                                                   |
|----------------------------------------------------|--------------------------|-------------------------------------|-------------------------------------------------------------------------------------------------------------------------------------------------------------------------------------------------------------------------------------------------------------------------------------------------------------------------------------------------------------------------------------------------------------------------------------------------------------------------------------------------------------------------------------------------------------------------------------|-------------------------------------------------------------------------------------------------------------------------------------------------------------------------------------------------------|-----------------------------------------------------------------------------------------------------------------------------------------------------------------------------------------------------------------------------------------------------------------------------------------------------------------------------------------------------------|
| Non-pharma                                         | erson [57]               |                                     | management, information on physical exercises, information on weight loss.<br>CG: usual care                                                                                                                                                                                                                                                                                                                                                                                                                                                                                        |                                                                                                                                                                                                       |                                                                                                                                                                                                                                                                                                                                                           |
| Vong, Cheing [11]; RCT; Non-pharma                 | Nicols on, Bennel l [58] | Low Back Pain<br>IG n=38<br>CG n=38 | IG: motivational enhancement treatment (MET) including supporting appropriate behaviour change and increasing self-efficacy PLUS PT<br>CG: conventional physical therapy (PT)                                                                                                                                                                                                                                                                                                                                                                                                       | exercise compliance (exercise log book).                                                                                                                                                              | exercise compliance better than in the CG group (P=.002) The IG performed home exercises 2 times more frequently than the CG in session 10 (MET-plus-PT, 13.9±8.2 vs PT, 6.2±3.6sessions/wk) and 1-month follow-up (MET-plus-PT, 12.9±7.2 vs PT, 5.8±4.1sessions/wk).                                                                                     |
| Halbert, Crotty [12]; RCT; Non-pharma              | Ezzat, MacPherson [57]   | OA<br>IG n=37<br>CG n=32            | IG: individualized physical activity advice<br>CG: received a pamphlet on good nutrition                                                                                                                                                                                                                                                                                                                                                                                                                                                                                            | Adherence was measured with intention to exercise: self-reported questionnaire                                                                                                                        | (P=0.013) reported a greater intention to exercise. Numbers are not reported, can be only estimated from the graphs.                                                                                                                                                                                                                                      |
| Brus, Van De Laar [13] RCT; medication             | Depon t, Berenbaum [54]  | RA<br>IG n=25<br>CG n=30            | IC: education programme focused on compliance with sulphasalazine therapy, physical exercises, endurance activities (walking, swimming, bicycling), advice on energy conservation, and joint protection, training was given in proper execution of physical exercises. Patients were encouraged to plan their treatment regimens. Their intentions were discussed and help was given in recasting unrealistic ones. Patients made contracts with themselves regarding their intentions. Feedback on the eventual implementation of therapeutic advice was included in each meeting. | Adherence measured by questionnaire: patients were asked how many times a week and how many minutes average each time they performed these activities. Time spent on endurance activities were added. | Only at three months, the increment of time spent on physical exercises was significantly greater in the experimental group (mean IC 30 (SD 42); CG 4 (SD 56), p<0.05). During the observational period, the time spent on endurance exercise did not differ significantly between groups.                                                                |
| O'Brien, Bassett [18]; Feasibility RCT; Non-pharma | Ezzat, MacPherson [57]   | Lower limb OA<br>IG n=17<br>CG n=10 | IG: Action and Coping Planning Strategies: developed a realistic functional goal, discussion of benefits, support with the completion of their planning forms, discussion barriers and strategies to overcome these barriers<br>CG: usual care                                                                                                                                                                                                                                                                                                                                      | Adherence: Attendance and Programme Completion, Sport Injury Rehabilitation Adherence Scale (SIRA), participant self-report scale (1 = not at all to 5 = as advised)                                  | No differences regarding adherence: Classes attended (IG 17 (SD11) and CG 16 (SD 10) out of 31, p= 0.81; SIRAS IG 4.5 (SD 0.4), CG 4.6 (SD 0.9), p=0.52; Home-based stretching IG 3.7 (SD 1.3), CG 3.9 (SD 0.2), p=0.21; walking IG 3.6 (SD 1.3), CG 3.5 (SD 1.0), p=0.93). There were no significant differences between the two groups' adherence rates |

| Study, Design, med/non-pharma             | Review                    | Dig., IG, CG                                                 | Intervention                                                                                                                                                                                                                                                                                                                                                                                                                                                                                                                                                                                          | Outcome measures                                                                                                                                                                                                                                                                                                                                                                                                                                                    | Results                                                                                                                                                         |
|-------------------------------------------|---------------------------|--------------------------------------------------------------|-------------------------------------------------------------------------------------------------------------------------------------------------------------------------------------------------------------------------------------------------------------------------------------------------------------------------------------------------------------------------------------------------------------------------------------------------------------------------------------------------------------------------------------------------------------------------------------------------------|---------------------------------------------------------------------------------------------------------------------------------------------------------------------------------------------------------------------------------------------------------------------------------------------------------------------------------------------------------------------------------------------------------------------------------------------------------------------|-----------------------------------------------------------------------------------------------------------------------------------------------------------------|
| Basler, Bertalanffy [19]; RCT; Non-pharma | Nicols on, Bennell I [58] | LBP<br>IG n=86<br>CG n=84                                    | IG: Control intervention (excluding sham ultrasound) +10 min of counselling at each session, delivered by the physiotherapist, focusing on readiness to change and increasing self-efficacy.<br>CG: 10× 20 min sessions with physiotherapist over 5 weeks + home exercise programme: stretching and tailored exercise (strength, endurance, coordination) +10 min of sham ultrasound prior to the session.                                                                                                                                                                                            | Self-reported in logbook—time/day spent training (minutes).                                                                                                                                                                                                                                                                                                                                                                                                         | 6 weeks IG 29.2±14.6; CG 24.7±16.3; p= not reported, Effect size (d) = 0.29<br><br>6 months IG 29.6±24.2; CG 25.3±19.7; p= not reported, Effect size (d) = 0.19 |
| Bennell, Kyriakides [20] RCT; Non-pharma  | Nicols on, Bennell I [58] | Hip/knee OA<br>IG n=40<br>CG n=38                            | IG: Control intervention +2× 30 mi individual 'booster' sessions with a physiotherapist over 16 weeks (at weeks 8 and 16 from the end of the original RCT 12-week period). Reviewed and progressed home exercise programme content and dose, discussed barriers to exercise adherence and strategies to overcome these.<br>CG: 10–14× 30 min individual exercise sessions with a physiotherapist over 12 weeks. Advice to continue an unsupervised home exercise programme of strengthening or neuromuscular retraining exercises 4× week for 24 weeks (from the end of the original 12-week period). | (1) Self-reported in logbook—number of exercises completed per day. Values reported as % of prescribed exercises performed over 2×1 week periods (where 100% indicates all prescribed exercises performed as directed).<br>(2) Self-reported overall adherence to the prescribed exercise programme. Values reported as average of ratings given for the previous 8-week period at weeks 8, 16 and 24. (11-point NRS: 0= not at all, 10= completely as instructed). | 24 weeks<br>(1) IG 56±34; CG 51±37; p>0.05, Effect size (d) 0.14<br>(2) IG 6.1±3.2; CG 5.5±3.5 p>0.05. Effect size (d) 0.18                                     |
| Schoo, Morris [21]; RCT; Non-pharma       | Nicols on, Bennell I [58] | Hip/knee OA<br>IG n=30 (Audio)<br>IG n=30 (Video)<br>CG n=30 | IG: Audio group: Control intervention + audio tape of verbal cues to prompt correct performance of exercises.<br>IG: Video group: Control intervention + video tape of verbal and visual cues to prompt correct performance of exercises.<br>CG: 3× individual sessions with a physiotherapist over 8 weeks (baseline, 4 weeks and 8 weeks) consisting of face-to-face verbal instruction on the performance of 9 home exercises and a brochure of the exercises.                                                                                                                                     | Self-reported in a logbook. Participants asked if all, some or none of prescribed exercises were performed each day. Values reported as median % that reported completing all exercises.                                                                                                                                                                                                                                                                            | 4 weeks IG Audio: 89.0%; IG Video: 92.0%; CG 93.0% p=0.690<br>8 weeks IG Audio: 87.0%; IG Video: 81.5%; CG 89.5% p=0.538                                        |

## REFERENCES

1. Zangi HA, Ndosi M, Adams J, et al. EULAR recommendations for patient education for people with inflammatory arthritis. *Annals of the rheumatic diseases* 2015;74(6):954-962.
2. Chewning B, Bylund CL, Shah B, et al. Patient preferences for shared decisions: a systematic review. *Patient education and counseling* 2012;86(1):9-18.
3. Balato N, Megna M, Di Costanzo L, et al. Educational and motivational support service: a pilot study for mobile-phone-based interventions in patients with psoriasis. *British journal of dermatology* 2013;168(1):201-205.
4. Hill J, Bird H, Johnson S. Effect of patient education on adherence to drug treatment for rheumatoid arthritis: a randomised controlled trial. *Annals of the rheumatic diseases* 2001;60(9):869-875.
5. El Miedany Y, El Gaafary M, Palmer D. Assessment of the utility of visual feedback in the treatment of early rheumatoid arthritis patients: a pilot study. *Rheumatology international* 2012;32(10):3061-3068.
6. El Miedany Y, El Gaafary M, El Arousy N, et al. Arthritis education: the integration of patient-reported outcome measures and patient self-management. *Clin Exp Rheumatol* 2012;30(6):899-904.
7. Clifford S, Barber N, Elliott R, et al. Patient-centred advice is effective in improving adherence to medicines. *Pharmacy World and Science* 2006;28(3):165.
8. Ganachari M, Almas SA. Evaluation of clinical pharmacist mediated education and counselling of systemic lupus erythematosus patients in tertiary care hospital. *Indian Journal of Rheumatology* 2012;7(1):7-12.
9. Rapoff MA, Belmont J, Lindsley C, et al. Prevention of nonadherence to nonsteroidal anti-inflammatory medications for newly diagnosed patients with juvenile rheumatoid arthritis. *Health Psychology* 2002;21(6):620.
10. Ravaud P, Flipo R, Boutron I, et al. ARTIST (osteoarthritis intervention standardized) study of standardised consultation versus usual care for patients with osteoarthritis of the knee in primary care in France: pragmatic randomised controlled trial. *Bmj* 2009;338:b421.
11. Vong SK, Cheing GL, Chan F, et al. Motivational enhancement therapy in addition to physical therapy improves motivational factors and treatment outcomes in people with low back pain: a randomized controlled trial. *Archives of physical medicine and rehabilitation* 2011;92(2):176-183.
12. Halbert J, Crotty M, Weller D, et al. Primary care-based physical activity programs: effectiveness in sedentary older patients with osteoarthritis symptoms. *Arthritis Care & Research: Official Journal of the American College of Rheumatology* 2001;45(3):228-234.
13. Brus HL, Van De Laar MA, Taal E, et al. Effects of patient education on compliance with basic treatment regimens and health in recent onset active rheumatoid arthritis. *Annals of the rheumatic diseases* 1998;57(3):146-151.
14. Homer D, Nightingale P, Jobanputra P. Providing patients with information about disease-modifying anti-rheumatic drugs: Individually or in groups? A pilot randomized controlled trial comparing adherence and satisfaction. *Musculoskeletal care* 2009;7(2):78-92.
15. Zwikker HE, van den Ende CH, van Lankveld WG, et al. Effectiveness of a group-based intervention to change medication beliefs and improve medication adherence in patients with rheumatoid arthritis: a randomized controlled trial. *Patient Education and Counseling* 2014;94(3):356-361.
16. McEvoy Devellis B, Blalock SJ, Hahn PM, et al. Evaluation of a problem-solving intervention for patients with arthritis. *Patient Education and Counseling* 1988;11(1):29-42.
17. Solomon DH, Iversen MD, Avorn J, et al. Osteoporosis telephonic intervention to improve medication regimen adherence: a large, pragmatic, randomized controlled trial. *Archives of internal medicine* 2012;172(6):477-483.
18. O'Brien D, Bassett S, McNair P. The effect of action and coping plans on exercise adherence in people with lower limb osteoarthritis: a feasibility study. *NZJ Physiother* 2013;41(2):49-57.
19. Basler HD, Bertalanffy H, Quint S, et al. TTM-based counselling in physiotherapy does not contribute to an increase of adherence to activity recommendations in older adults with chronic low back pain—A randomised controlled trial. *European Journal of Pain* 2007;11(1):31-31.
20. Bennell KL, Kyriakides M, Hodges PW, et al. Effects of two physiotherapy booster sessions on outcomes with home exercise in people with knee osteoarthritis: a randomized controlled trial. *Arthritis care & research* 2014;66(11):1680-1687.
21. Schoo AMM, Morris M, Bui Q. The effects of mode of exercise instruction on compliance with a home exercise program in older adults with osteoarthritis. *Physiotherapy* 2005;91(2):79-86.
22. Pisters MF, Veenhof C, de Bakker DH, et al. Behavioural graded activity results in better exercise adherence and more physical activity than usual care in people with osteoarthritis: a cluster-randomised trial. *Journal of physiotherapy* 2010;56(1):41-47.
23. Van den Berg MH, Runday HK, Peeters AJ, et al. Using internet technology to deliver a home-based physical activity intervention for patients with rheumatoid arthritis: A randomized controlled trial. *Arthritis Care & Research: Official Journal of the American College of Rheumatology* 2006;55(6):935-945.
24. Evers AW, Kraaijmaat FW, van Riel PL, et al. Tailored cognitive-behavioral therapy in early rheumatoid arthritis for patients at risk: a randomized controlled trial. *Pain* 2002;100(1-2):141-153.
25. Ting TV, Kudalkar D, Nelson S, et al. Usefulness of cellular text messaging for improving adherence among adolescents and young adults with systemic lupus erythematosus. *The Journal of rheumatology* 2012;39(1):174-179.



26. Tüzün S, Cıfcılı S, Akman M, et al. How can we improve adherence to exercise programs in patients with osteoarthritis?: A randomized controlled trial. *Turkish Journal of Geriatrics* 2012;15(3).
27. Van den Bemt B, Den Broeder A, Van Den Hoogen F, et al. Making the rheumatologist aware of patients' non-adherence does not improve medication adherence in patients with rheumatoid arthritis. *Scandinavian journal of rheumatology* 2011;40(3):192-196.
28. Rudd RE, Blanch DC, Gall V, et al. A randomized controlled trial of an intervention to reduce low literacy barriers in inflammatory arthritis management. *Patient education and counseling* 2009;75(3):334-339.
29. Ravindran V, Jadhav R. The effect of rheumatoid arthritis disease education on adherence to medications and followup in Kerala, India. *The Journal of rheumatology* 2013;40(8):1460-1461.
30. Stockl KM, Shin JS, Lew HC, et al. Outcomes of a rheumatoid arthritis disease therapy management program focusing on medication adherence. *Journal of Managed Care Pharmacy* 2010;16(8):593-604.
31. Manning VL, Hurley MV, Scott DL, et al. Education, self-management, and upper extremity exercise training in people with rheumatoid arthritis: A randomized controlled trial. *Arthritis care & research* 2014;66(2):217-227.
32. Lai PSM, Chua SS, Chan SP. Impact of pharmaceutical care on knowledge, quality of life and satisfaction of postmenopausal women with osteoporosis. *International journal of clinical pharmacy* 2013;35(4):629-637.
33. John H, Hale ED, Treharne GJ, et al. A randomized controlled trial of a cognitive behavioural patient education intervention vs a traditional information leaflet to address the cardiovascular aspects of rheumatoid disease. *Rheumatology* 2012;52(1):81-90.
34. Brodin N, Eurenus E, Jensen I, et al. Coaching patients with early rheumatoid arthritis to healthy physical activity: a multicenter, randomized, controlled study. *Arthritis Care & Research* 2008;59(3):325-331.
35. Sjöquist ES, Brodin N, Lampa J, et al. Physical activity coaching of patients with rheumatoid arthritis in everyday practice: a long-term follow-up. *Musculoskeletal Care* 2011;9(2):75-85.
36. Hughes SL, Seymour RB, Campbell RT, et al. Fit and strong: bolstering maintenance of physical activity among older adults with lower-extremity osteoarthritis. *American journal of health behavior* 2010;34(6):750-763.
37. Mayoux-Benhamou A, Giraudet-Le Quintrec J-S, Ravaud P, et al. Influence of patient education on exercise compliance in rheumatoid arthritis: a prospective 12-month randomized controlled trial. *The Journal of rheumatology* 2008;35(2):216-223.
38. Knittle K, De Gucht V, Hurkmans E, et al. Targeting motivation and self-regulation to increase physical activity among patients with rheumatoid arthritis: a randomised controlled trial. *Clinical rheumatology* 2015;34(2):231-238.
39. Friedrich M, Gittler G, Halberstadt Y, et al. Combined exercise and motivation program: effect on the compliance and level of disability of patients with chronic low back pain: a randomized controlled trial. *Archives of physical medicine and rehabilitation* 1998;79(5):475-487.
40. Williams NH, Amoakwa E, Belcher J, et al. Activity Increase Despite Arthritis (AIDA): phase II randomised controlled trial of an active management booklet for hip and knee osteoarthritis in primary care. *Br J Gen Pract* 2011;61(589):e452-e458.
41. Conn DL, Pan Y, Easley KA, et al. The effect of the Arthritis Self-Management Program on outcome in African Americans with rheumatoid arthritis served by a public hospital. *Clinical rheumatology* 2013;32(1):49-59.
42. Kennedy CA, Beaton DE, Warmington K, et al. Prescription for education: development, evaluation, and implementation of a successful interprofessional education program for adults with inflammatory arthritis. *The Journal of rheumatology* 2011;38(10):2247-2257.
43. O'Brien A, Jones P, Mullis R, et al. Conservative hand therapy treatments in rheumatoid arthritis—a randomized controlled trial. *Rheumatology* 2005;45(5):577-583.
44. Lamb SE, Williamson EM, Heine PJ, et al. Exercises to improve function of the rheumatoid hand (SARAH): a randomised controlled trial. *The Lancet* 2015;385(9966):421-429.
45. Hoenig H, Groff G, Pratt K, et al. A randomized controlled trial of home exercise on the rheumatoid hand. *The Journal of rheumatology* 1993;20(5):785-789.
46. Ellegaard K, Torp-Pedersen S, Lund H, et al. The effect of isometric exercise of the hand on the synovial blood flow in patients with rheumatoid arthritis measured by color Doppler ultrasound. *Rheumatology international* 2013;33(1):65-70.
47. Rønningen A, Kjekken I. Effect of an intensive hand exercise programme in patients with rheumatoid arthritis. *Scandinavian journal of occupational therapy* 2008;15(3):173-183.
48. Elkjaer M, Shuhaibar M, Burisch J, et al. E-health empowers patients with ulcerative colitis: a randomised controlled trial of the web-guided 'Constant-care' approach. *Gut* 2010;59(12):1652-1661.
49. Moshkovska T, Stone MA, Smith RM, et al. Impact of a tailored patient preference intervention in adherence to 5-aminosalicylic acid medication in ulcerative colitis: results from an exploratory randomized controlled trial. *Inflammatory bowel diseases* 2011;17(9):1874-1881.
50. Cook PF, Emiliozzi S, El-Hajj D, et al. Telephone nurse counseling for medication adherence in ulcerative colitis: a preliminary study. *Patient education and Counseling* 2010.
51. Cross RK, Cheevers N, Rustgi A, et al. Randomized, controlled trial of home telemanagement in patients with ulcerative colitis (UC HAT). *Inflammatory bowel diseases* 2011;18(6):1018-1025.
52. Moss AC, Chaudhary N, Tukey M, et al. Impact of a patient-support program on mesalamine adherence in patients with ulcerative colitis—a prospective study. *Journal of Crohn's and Colitis* 2010;4(2):171-175.

53. Waters BM, Jensen L, Fedorak RN. Effects of formal education for patients with inflammatory bowel disease: a randomized controlled trial. *Canadian Journal of Gastroenterology and Hepatology* 2005;19(4):235-244.
54. Depont F, Berenbaum F, Filippi J, et al. Interventions to improve adherence in patients with immune-mediated inflammatory disorders: a systematic review. *PLoS One* 2015;10(12):e0145076.
55. Galo JS, Mehat P, Rai SK, et al. What are the effects of medication adherence interventions in rheumatic diseases: a systematic review. *Annals of the rheumatic diseases* 2016;75(4):667-673.
56. Ganguli A, Clewell J, Shillington AC. The impact of patient support programs on adherence, clinical, humanistic, and economic patient outcomes: a targeted systematic review. *Patient preference and adherence* 2016;10:711.
57. Ezzat AM, MacPherson K, Leese J, et al. The effects of interventions to increase exercise adherence in people with arthritis: a systematic review. *Musculoskeletal Care* 2015;13(1):1.
58. Nicolson PJA, Bennell KL, Dobson FL, et al. Interventions to increase adherence to therapeutic exercise in older adults with low back pain and/or hip/knee osteoarthritis: a systematic review and meta-analysis. *Br J Sports Med* 2017;51(10):791-799.
