# Supplementary material for: Prevention, screening, assessing and managing of non-adherent behaviour in people with rheumatic and musculoskeletal diseases: systematic reviews informing the 2020 EULAR points to consider
Source: PubMed Central journal article supplement — RMD Open. 2020 Nov 9;6(3):e001432. doi: 10.1136/rmdopen-2020-001432 (PMC7856118; doi:10.1136/rmdopen-2020-001432), 2020-11-09
Supplement: rmdopen-2020-001432supp007.pdf [file rmdopen-2020-001432supp007.pdf]

## Supplement\_G\_PICO\_5\_screening of adherence to exercise

### PICO 5 – How is non-adherence to exercise screened/detected?

| Clinical Question                     | P   | I                                               | C         | O          | D                      |
|---------------------------------------|-----|-------------------------------------------------|-----------|------------|------------------------|
| How should non-adherence be screened? | Any | Questions, questionnaires, tailored assessments | Adherence | Validation | Systematic Review (SR) |

### Rationale

Exercise improves fitness and functional ability for people with long-term conditions, as long as these are adherent to the prescribed exercise and levels of physical activity.

Our objective was to identify adherence measurement methods used to quantify adherence to exercise and physical activity.

### Methods

We performed an overview of systematic reviews (SR).

Three search strategies were designed, each directed to capture the elements of our PICOD in different databases. The databases queried were Medline (via PubMed), Embase, and Cochrane Library. All retrieved references were exported into EndNote and screened by title and abstract selection. The full texts of the potentially eligible studies were retrieved and read in detail. Afterwards, the SR selected were assessed with the AMSTAR-2 tool.

### Results

On August 22, 2019 the following search strategies were performed returning a total of **21** studies:

| PubMed |                                                                                                                                                                                                                                                                                                                                                                                                                                                                                                                                                                                                                                                                                                                                                                                                                                              |           |
|--------|----------------------------------------------------------------------------------------------------------------------------------------------------------------------------------------------------------------------------------------------------------------------------------------------------------------------------------------------------------------------------------------------------------------------------------------------------------------------------------------------------------------------------------------------------------------------------------------------------------------------------------------------------------------------------------------------------------------------------------------------------------------------------------------------------------------------------------------------|-----------|
| #1     | Search "Exercise Therapy"[Mesh]                                                                                                                                                                                                                                                                                                                                                                                                                                                                                                                                                                                                                                                                                                                                                                                                              | 47148     |
| #2     | Search "Sports"[Mesh]                                                                                                                                                                                                                                                                                                                                                                                                                                                                                                                                                                                                                                                                                                                                                                                                                        | 173939    |
| #3     | Search "Exercise"[Mesh]                                                                                                                                                                                                                                                                                                                                                                                                                                                                                                                                                                                                                                                                                                                                                                                                                      | 182086    |
| #4     | Search "Exercise Movement Techniques"[Mesh]                                                                                                                                                                                                                                                                                                                                                                                                                                                                                                                                                                                                                                                                                                                                                                                                  | 7661      |
| #5     | Search kinesiotherap*[Title/Abstract] OR exercise*[Title/Abstract] OR motion*[Title/Abstract] OR train*[Title/Abstract] OR sport*[Title/Abstract] OR fitness[Title/Abstract]                                                                                                                                                                                                                                                                                                                                                                                                                                                                                                                                                                                                                                                                 | 1002036   |
| #6     | Search #1 OR #2 OR #3 OR #4 OR #5                                                                                                                                                                                                                                                                                                                                                                                                                                                                                                                                                                                                                                                                                                                                                                                                            | 1125814   |
| #7     | Search "Patient Compliance"[Mesh]                                                                                                                                                                                                                                                                                                                                                                                                                                                                                                                                                                                                                                                                                                                                                                                                            | 72580     |
| #8     | Search "Exercise Adherence"[Mesh]                                                                                                                                                                                                                                                                                                                                                                                                                                                                                                                                                                                                                                                                                                                                                                                                            | 0         |
| #9     | Search #7 OR #8                                                                                                                                                                                                                                                                                                                                                                                                                                                                                                                                                                                                                                                                                                                                                                                                                              | 72580     |
| #10    | Search "sensitivity and specificity"[MeSH Terms]                                                                                                                                                                                                                                                                                                                                                                                                                                                                                                                                                                                                                                                                                                                                                                                             | 559701    |
| #11    | Search "sensitivity and specificity"[MeSH Terms] OR ("sensitivity"[All Fields] AND "specificity"[All Fields]) OR "sensitivity and specificity"[All Fields] OR "sensitivity"[All Fields] OR "specificity"[All Fields] OR "validation studies"[Publication Type]                                                                                                                                                                                                                                                                                                                                                                                                                                                                                                                                                                               | 1865629   |
| #12    | Search (("sensitivity and specificity"[MeSH Terms] OR ("sensitivity"[All Fields] AND "specificity"[All Fields]) OR "sensitivity and specificity"[All Fields] OR "sensitivity"[All Fields] OR "specificity"[All Fields] OR "validation studies"[Publication Type] OR "validation studies as topic"[MeSH Terms] OR "validation studies"[All Fields] OR "roc curve"[MeSH Terms] OR ("roc"[All Fields] AND "curve"[All Fields]) OR "roc curve"[All Fields] OR "Reproducibility of Results"[Mesh] OR reproducibility[Title/Abstract] OR Reliability[All Fields] OR Validity[All Fields] OR "Feasibility Studies"[Mesh] OR Feasibility[All Fields] OR "construct validity"[All Fields] OR (clinimetric[All Fields] AND (properties[All Fields]) OR "Psychometrics"[Mesh] OR responsiveness[All Fields] OR "sensitivity to change"[Title/Abstract]) | 296313    |
| #13    | Search #10 or #11 or #12                                                                                                                                                                                                                                                                                                                                                                                                                                                                                                                                                                                                                                                                                                                                                                                                                     | 2025750   |
| #14    | Search systematic[sb]                                                                                                                                                                                                                                                                                                                                                                                                                                                                                                                                                                                                                                                                                                                                                                                                                        | 137225    |
| #19    | Search #6 AND #9 AND #13 AND #14                                                                                                                                                                                                                                                                                                                                                                                                                                                                                                                                                                                                                                                                                                                                                                                                             | <b>13</b> |

| Embase   |                                                                                                                                                                               |           |
|----------|-------------------------------------------------------------------------------------------------------------------------------------------------------------------------------|-----------|
| #1       | 'kinesiotherapy'/exp OR 'sport'/exp OR 'exercise'/exp                                                                                                                         | 500,993   |
| #2       | 'exercise therapy':ti,ab OR 'exercise movement techniques':ti,ab OR kinesiotherap*:ti,ab OR exercise*:ti,ab OR motion*:ti,ab OR train*:ti,ab OR sport*:ti,ab OR fitness:ti,ab | 1,308,149 |
| #3       | #1 OR #2                                                                                                                                                                      | 1,481,738 |
| #4       | 'patient compliance'/exp OR 'exercise adherence':ti,ab                                                                                                                        | 150,143   |
| #5       | 'sensitivity and specificity'/exp OR ('sensitivity':ti,ab AND 'specificity':ti,ab) OR 'sensitivity and specificity':ti,ab OR 'sensitivity':ti,ab OR 'specificity':ti,ab       | 1,415,544 |
| #6       | 'validation study'/exp OR 'validation studies as topic':ti,ab OR 'validation studies':ti,ab                                                                                   | 82,660    |
| #7       | 'receiver operating characteristic'/exp OR ('roc':ti,ab AND 'curve':ti,ab) OR 'roc curve':ti,ab                                                                               | 127,788   |
| #8       | 'reproducibility'/exp OR 'reproducibility of results':ti,ab OR reproducibility:ti,ab OR reliability:ti,ab OR validity:ti,ab                                                   | 534,600   |
| #9       | 'feasibility study'/exp OR feasibility:ti,ab OR 'construct validity':ti,ab OR (clinimetric:ti,ab AND properties:ti,ab)                                                        | 281,993   |
| #10      | 'psychometry'/exp OR responsiveness:ti,ab OR 'sensitivity to change':ti,ab                                                                                                    | 214,141   |
| #11      | #5 OR #6 OR #7 OR #8 OR #9 OR #10                                                                                                                                             | 2,330,625 |
| #12      | #3 AND #4 AND #11                                                                                                                                                             | 1,559     |
| #13      | #12 AND [embase]/lim NOT ([embase]/lim AND [medline]/lim)                                                                                                                     | 388       |
| #14      | #12 AND [embase]/lim NOT ([embase]/lim AND [medline]/lim) AND [systematic review]/lim                                                                                         | 8         |
| Cochrane |                                                                                                                                                                               |           |
| #1       | [mh "Exercise Therapy"]                                                                                                                                                       | 12204     |
| #2       | [mh Sports]                                                                                                                                                                   | 14624     |
| #3       | [mh Exercise]                                                                                                                                                                 | 22235     |
| #4       | [mh "Exercise Movement Techniques"]                                                                                                                                           | 1890      |
| #5       | (kinesiotherap* OR exercise* OR motion* OR train* OR sport* OR fitness):ti,ab                                                                                                 | 152080    |
| #6       | #1 OR #2 OR #3 OR #4                                                                                                                                                          | 34069     |
| #7       | [mh "Patient Compliance"]                                                                                                                                                     | 11316     |
| #8       | [mh "Exercise Adherence"]                                                                                                                                                     | 0         |
| #9       | #7 OR #8                                                                                                                                                                      | 11316     |
| #10      | [mh "sensitivity and specificity"]                                                                                                                                            | 16128     |
| #11      | (("sensitivity" AND "specificity") OR ("sensitivity and specificity")):ti,ab                                                                                                  | 10265     |
| #12      | ("sensitivity" OR "specificity"):ti,ab                                                                                                                                        | 47741     |
| #13      | ("validation studies"):pt                                                                                                                                                     | 2429      |
| #14      | [mh "validation studies as topic"] OR "validation studies":ti,ab                                                                                                              | 252       |
| #15      | [mh "roc curve"] OR (("roc" AND "curve") OR "roc curve"):ti,ab                                                                                                                | 2723      |
| #16      | [mh "Reproducibility of Results"] OR (reproducibility OR reliability OR validity):ti,ab                                                                                       | 26501     |
| #17      | [mh "Feasibility Studies"] OR (Feasibility OR "construct validity"):ti,ab                                                                                                     | 30778     |
| #18      | (clinimetric AND properties):ti,ab                                                                                                                                            | 31        |
| #19      | [mh "Psychometrics"]                                                                                                                                                          | 2844      |
| #20      | responsiveness:ti,ab                                                                                                                                                          | 6721      |
| #21      | "sensitivity to change":ti,ab                                                                                                                                                 | 335       |
| #22      | #10 OR #11 OR #12 OR #13 OR #14 OR #15 OR #16 OR #17 OR #18 OR #19 OR #20 OR #21                                                                                              | 114684    |
| #23      | #6 AND #9 AND #22 in Cochrane Reviews                                                                                                                                         | 0         |

After title selection, **13** studies were excluded. The remaining **8** studies were selected for a Full-text reading. After the full-text reading, **5** studies were excluded. The reasons for their exclusion are shown in **Table 1**.

**Table 1.** Excluded studies after full-text reading.

| Study | Reason for exclusion                            |
|-------|-------------------------------------------------|
| [1]   | Wrong outcome (not a validation study).         |
| [2]   | Wrong comparator (self-efficacy).               |
| [3]   | Wrong outcome (not a validation study).         |
| [4]   | Wrong intervention (barriers and facilitators). |
| [5]   | Wrong outcome (not a validation study).         |

The remaining 3 studies were included and a basic description of them is shown in **Table 2**. In total they include **162** individual studies (some maybe duplicate) and **76** ways of measuring adherence to prescribed exercises.

**Table 2.** Description of the 3 included studies.

| Study | Setting                                                                  | Population                                                                                                         | Design                                                                         | n                                                        | Quality by AMSTAR 2 |
|-------|--------------------------------------------------------------------------|--------------------------------------------------------------------------------------------------------------------|--------------------------------------------------------------------------------|----------------------------------------------------------|---------------------|
| [6]   | Adherence to prescribed unsupervised home-based rehabilitation exercises | Long-term physical conditions (cancer, RMD, CV, respiratory, neurological, genitourinary and endocrine conditions) | SR – All study designs                                                         | 58 studies → 61 measures                                 | Critically low      |
| [7]   | Phase 1: methods for measuring adherence in home-based rehabilitation.   | RMD, neurological, CV, urinary and others                                                                          | Phase 1: SR of RCT<br>Phase 2: SR of validation studies of measures identified | Phase 1: 56 studies → 8 measures<br>Phase 2: 109 studies | Critically low      |
| [8]   | Phase 2: evaluation of the psychometric properties                       | Stroke                                                                                                             | Phase 1: SR with all designs.<br>Phase 2: SR of validation studies             | Phase 1: 48 studies → 7 measures<br>Phase 2: 0           | Critically low      |

The results will be presented by each study.

**Table 3** shows a detailed description of the measures captured by the SR by Bollen et al.

**Table 3.** Measures described in the SR by Bollen *et al.*.

| Author | Type          | Name                                                                                  | How devised                                                                                          | Condition                                   | Description                                                                                                                                                                                                                                    | Score                                                                                                                                                                                       |
|--------|---------------|---------------------------------------------------------------------------------------|------------------------------------------------------------------------------------------------------|---------------------------------------------|------------------------------------------------------------------------------------------------------------------------------------------------------------------------------------------------------------------------------------------------|---------------------------------------------------------------------------------------------------------------------------------------------------------------------------------------------|
| [9]    | Questionnaire | NR                                                                                    | NR                                                                                                   | Carpal tunnel surgery                       | Questionnaire conducted as an interview. Questions on home exercise performance, frequency, and obstacles to the exercise program                                                                                                              | Weekly adherence was rated from 0 = non-compliant to 3 = compliant<br>Total score (6 weeks)<br>range = 0 - 18                                                                               |
| [10]   | Questionnaire | NR but referred to as a self-report scale                                             | NR                                                                                                   | Ankle sprain                                | Scales of adherence to the 5 methods of treatment: exercise, icing, not participating in activities that could be damaging to recovery, strapping of ankle, resting and elevating ankle                                                        | Adherence rated 1-5 for each applicable method of treatment                                                                                                                                 |
| [11]   | Questionnaire | NR but referred to as a self-report questionnaire                                     | NR                                                                                                   | Osteoarthritis                              | 2 questions at 3,6,9,12,15 and 18 months:<br>Frequency of exercises during the past 2 weeks<br>Adherence to the home-based exercises                                                                                                           | Each rated as<br>1 = "not at all" to 11 = "completely as instructed"                                                                                                                        |
| [12]   | Questionnaire | NR                                                                                    | NR but based on questionnaire by Sluijs et al '93                                                    | Urinary incontinence                        | 9 questions:<br>2 on frequency of exercises and completing all repetitions with choice of 4 answers.<br>7 questions on exercise barriers ('yes', 'no' and 'uncertain')<br>Minor alterations to make it relevant during the follow-up period.   | Weekly average No. exercises per day * No. days per week / 7                                                                                                                                |
| [13]   | Questionnaire | NR                                                                                    | NR                                                                                                   | Genitourinary conditions: Urge incontinence | 3 items<br>Items 1 and 2 on time spent and No. exercises completed on a 5 and 6 item scale, respectively.<br>Item 3 was VAS ranging from 0-10 where participants rate compliance. Completed face to face if possible but could also be posted. | Sum of scores. Range from 2 to 21                                                                                                                                                           |
| [14]   | Questionnaire | Leisure Score Index (LSI) modified from the Godin Leisure-Time Exercise Questionnaire | Added a question to the pre-existing questions regarding the average length of time spent exercising | Colorectal cancer                           | 3 open-ended questions on frequency and intensity of exercise.<br>Weekly over the telephone.                                                                                                                                                   | Average frequency of exercise * average duration of exercise at 3 intensity levels (mild, moderate and strenuous).<br><br>Minutes spent in moderate and strenuous exercise are then summed. |
| [15]   | Questionnaire | General Adherence Scale (GAS)                                                         | Based on a previous questionnaire for hypertensive medication adherence                              | Fibromyalgia                                | 5 scales each rated 1 – 6 on inclination to adhere in the past month                                                                                                                                                                           | Average of the 5 items → converted into a 0-100% scale                                                                                                                                      |

| Author | Type          | Name                                                   | How devised                                                                                                                                                                                                                                    | Condition                      | Description                                                                                                                                                                                                                                                                        | Score                                                                                                            |
|--------|---------------|--------------------------------------------------------|------------------------------------------------------------------------------------------------------------------------------------------------------------------------------------------------------------------------------------------------|--------------------------------|------------------------------------------------------------------------------------------------------------------------------------------------------------------------------------------------------------------------------------------------------------------------------------|------------------------------------------------------------------------------------------------------------------|
| [15]   | Questionnaire | Specific Adherence Scale (SAS)                         | Devised by authors                                                                                                                                                                                                                             | Fibromyalgia                   | 17 items 4-point (0-3) scales on adherence in the past week.<br>Self-reported by participants                                                                                                                                                                                      | Average of the 17 items → converted into a 0-100% scale                                                          |
| [16]   | Questionnaire | The Heart Failure Compliance Questionnaire             | Based on an existing measure for MI.<br>← interviews to 3 heart failure patients → generate items relevant to the target population<br>Reviewed by 6 specialist nurses, 1 sociologist + 10 participants regarding comprehensiveness and length | Heart failure                  | 6 subsections on health behaviors with 5-point scales<br>Overall adherence on a 5-point scale                                                                                                                                                                                      | Mean for each health behavior and combined.<br><br>Participants were deemed adherent if the combined score > 75% |
| [17]   | Questionnaire | NR                                                     | Devised by authors based on literature and piloted on the target population and physical therapists                                                                                                                                            | Older people: Impaired balance | A 43 item questionnaire containing 1 open ended question and 7 subscales (4-point scales).                                                                                                                                                                                         | Subscale scores were summed up                                                                                   |
| [18]   | Questionnaire | NR but referred to as a survey                         | Devised by authors for the study.<br>Content validity was attempted including experts but no-one from the target population.<br>Test-retest reliability was also attempted utilizing 10 participants over a 1-week timespan                    | Stress urinary incontinence    | Questionnaire with 4 sections on: No. times per day the exercises were conducted on average; time spent performing the exercises; time for each exercise; reason for doing the exercises.<br>Additional questions on the use of a cassette tape if in group with this intervention |                                                                                                                  |
| [19]   | Questionnaire | Adherence to Exercise Scale for Older Patients (AESOP) | Used items from pre-existing scales which could be modified, deleted or added to.<br>This was then checked for applicability in the target population.                                                                                         | Elderly                        | Interview.<br>3 subscales with a total of 45 items (5-point scales)                                                                                                                                                                                                                | The scores for each of the subscales were summed separately resulting in 3 totals                                |

| Author | Type          | Name    | How devised                                                                                                                                                                                                                        | Condition               | Description                                                                                                                                                                                                                                                                                                                  | Score                                    |
|--------|---------------|---------|------------------------------------------------------------------------------------------------------------------------------------------------------------------------------------------------------------------------------------|-------------------------|------------------------------------------------------------------------------------------------------------------------------------------------------------------------------------------------------------------------------------------------------------------------------------------------------------------------------|------------------------------------------|
| [20]   | Questionnaire | No name | Devised by authors based on literature. Attempts at face and content validity were made piloting the measure on 5 experts and 5 individuals from the target population                                                             | Osteopathy patients     | Self-administered. 3 subscales on: attitudes and experiences to exercise and health; whether the participant had an exercise program; whether the exercise program had been carried out as specified (All 5-point scales). The final question required a yes or no answer regarding their completion of prescribed exercises | Sum of subscales                         |
| [21]   | Questionnaire | NR      | Modified from a questionnaire by Marzolini and literature. Not validity or reliability testing. Face validity was attempted by asking patients, physicians and cardiac rehabilitation staff about relevance and range of questions | Stroke                  | Self-report 16-item questionnaire. Multiple choice for most questions but can write different response                                                                                                                                                                                                                       |                                          |
| [22]   | Questionnaire | NR      | NR                                                                                                                                                                                                                                 | Huntington's Disease    | Weekly telephone-administered questionnaire on: Whether they had conducted their exercises in the previous week, frequency, which exercises they had carried out, difficulties, and concerns                                                                                                                                 | NR                                       |
| [23]   | Questionnaire | NR      | NR but based on 7- day physical activity questionnaire                                                                                                                                                                             | Type 2 diabetes         | Recall questionnaire of all physical activity conducted during the last 7 days. Cues such as time of the day were used to aid recall. Items on frequency, duration and intensity of activity or exercise.                                                                                                                    | MET's were calculated based on responses |
| [24]   | Questionnaire | NR      | NR but based on Bassett (2003)                                                                                                                                                                                                     | Overuse tendonitis      | Items on adherence to exercises, cryotherapy and avoiding participating in activities that could aggravate injury on a 5 point scale 1= not at all- 5= as advised                                                                                                                                                            | Sum of all items                         |
| [25]   | Questionnaire | NR      | NR but the questionnaire was developed for the study                                                                                                                                                                               | Hip or knee replacement | By interview. Items on regularity, performance difficulties, problems remembering to do the exercises, satisfaction with rehabilitation whilst an inpatient and satisfaction with therapeutic exercises                                                                                                                      | NR                                       |
| [26]   | Questionnaire | NR      | NR                                                                                                                                                                                                                                 | Chronic low back pain   | Global impression of how often the exercises were performed per week (4-point scale from 'never' to '>5 times a week'.                                                                                                                                                                                                       |                                          |

| Author | Type          | Name                              | How devised                                                                                                                                                                     | Condition              | Description                                                                                                                                                                                                                                               | Score                                                                                                                 |
|--------|---------------|-----------------------------------|---------------------------------------------------------------------------------------------------------------------------------------------------------------------------------|------------------------|-----------------------------------------------------------------------------------------------------------------------------------------------------------------------------------------------------------------------------------------------------------|-----------------------------------------------------------------------------------------------------------------------|
| [27]   | Questionnaire | NR                                | Devised by a physician, researcher and a cardiac rehabilitation clinician, in conjunction with a market research professional                                                   | Cardiac patients       | 52-item questionnaire                                                                                                                                                                                                                                     | NR                                                                                                                    |
| [28]   | Questionnaire | NR                                | NR                                                                                                                                                                              | Osteoarthritis         | 4-item questionnaire on frequency of weekly exercises over the past month, time spent doing the exercises, stops, time since last time doing the exercises, perception of change in physical activity levels during the last six months. Multiple-choice. | NR                                                                                                                    |
| [29]   | Questionnaire | NR                                | NR but adapted from Sluijs et al (1993)                                                                                                                                         | Neck and low back pain | 5-point scale on frequency and duration of the exercise program ('never', 'seldom', 'often', 'almost always', 'always') for the past week                                                                                                                 | If 'always' or 'almost always' → deemed as adherent                                                                   |
| [30]   | Questionnaire | NR                                | NR                                                                                                                                                                              | Injured athletes       | 5-item self-reported questionnaire with 3 domains: frequency (2), duration (2) and perceived quality /performance of the exercises (1)                                                                                                                    | % were calculated combined for each domain                                                                            |
| [31]   | Questionnaire | NR                                | NR but devised by the author                                                                                                                                                    | Chronic low back pain  | No. days and time spent on the rehabilitation program during the past week                                                                                                                                                                                | NR                                                                                                                    |
| [32]   | Questionnaire | Exercise Compliance Questionnaire | Devised by author based on literature                                                                                                                                           | Cardiac rehabilitation | 8-item questionnaire with 6 questions on frequency, duration, intensity and method of exercise scored on a 5-point scale + 2 questions on aspects before heart attack                                                                                     | Scores were weighted for questions 1 to 6 → 30 - 150. If score <50 then 'low adherers' If score >100 'high adherence' |
| [33]   | Questionnaire | NR                                | NR                                                                                                                                                                              | Physiotherapy patients | 1 4-point question on whether regularly exercised in the past week (from 'not at all' to 'very regularly')                                                                                                                                                | NR                                                                                                                    |
| [34]   | Questionnaire | No name                           | NR how it was devised. Face validity was conducted and the authors attempted to establish applicability                                                                         | Rheumatoid arthritis   | 2-sections: 1) 6 questions on the exercise program, and 2) 11 questions on factors that may influence adherence.                                                                                                                                          | Means and frequencies calculated combining the 2 sections                                                             |
| [35]   | Questionnaire | NR                                | NR but developed for this study and based on the Manchester Cystic Fibrosis Compliance Questionnaire. Piloted by 2 individuals from the target population who provided feedback | Cystic fibrosis        | By interview. 3 sections: 1) background, 2) adherence to airway clearance, and 3) adherence to exercise program.                                                                                                                                          | NR                                                                                                                    |

| Author | Type      | Name                                                       | How devised                                                               | Condition                   | Description                                                                                                                                                                                                                           | Score                                                                                                                                                                |
|--------|-----------|------------------------------------------------------------|---------------------------------------------------------------------------|-----------------------------|---------------------------------------------------------------------------------------------------------------------------------------------------------------------------------------------------------------------------------------|----------------------------------------------------------------------------------------------------------------------------------------------------------------------|
| [36]   | Log/diary | 7- day diary                                               | NR                                                                        | Urinary incontinence        | 5-point scale on No. days during the week carried out the exercises as per the physiotherapist's instructions.                                                                                                                        | The first 3 response options were deemed as 'nonadherence', the 4 <sup>th</sup> option as 'moderate adherence' and the 5 <sup>th</sup> as 'ideal level of adherence' |
| [37]   | Log/diary | NR but referred to as a diary                              | NR but physical therapists had input into the adherence rating categories | Low back pain               | The diary recorded exercise frequency each week.                                                                                                                                                                                      | Adherence was rated between 0-2 based on the review of the log (2 = 'highly adherent', 1 = 'low adherer', 0 = 'not adherent')                                        |
| [38]   | Log/diary | NR but referred to as Exercise Diary                       | NR                                                                        | Stress urinary incontinence | Record exercise sessions attended / carried out each week                                                                                                                                                                             | % of the No. exercise sessions / No. exercises sessions prescribed                                                                                                   |
| [39]   | Log/diary | NR but referred to as Exercise Log                         | NR                                                                        | Older People: Activity      | Log recorded various activities frequency and duration providing the duration was >10 minutes.                                                                                                                                        | Mean of reported activities per week                                                                                                                                 |
| [40]   | Log/diary | NR but referred to as self-report and follows a log format | NR but designed for study                                                 | Physiotherapy patients      | Each exercise was recorded with number of repetitions and duration of session                                                                                                                                                         | % of No. exercise sessions actually completed / No. sessions prescribed                                                                                              |
| [41]   | Log/diary | NR                                                         | NR                                                                        | Pulmonary rehabilitation    | Standardized questions used (NR) to record the type and frequency of exercises carried out at home in addition to any attendance at exercise classes and other physical activity.                                                     | NR                                                                                                                                                                   |
| [42]   | Log/diary | NR but referred to as a daily log                          | NR                                                                        | COPD                        | Recorded the time, number of walks and level of dyspnea after each walk per day                                                                                                                                                       | No. walks done / No. prescribed                                                                                                                                      |
| [43]   | Log/diary | NR but referred to as an exercise diary                    | Unclear                                                                   | Heart failure               | Recorded duration and frequency of the prescribed exercises + type of exercise carried out                                                                                                                                            | No. exercise sessions carried out / No. sessions prescribed.                                                                                                         |
| [44]   | Log/diary | NR but referred to as an exercise log                      | NR                                                                        | Osteoarthritis              | Recorded frequency and duration of the exercises.                                                                                                                                                                                     | No. exercise sessions carried out / No. sessions prescribed.                                                                                                         |
| [45]   | Log/diary | Daily Mobile phone diary                                   | NR                                                                        | Sedentary Women             | The log was completed every evening between 7pm-12am.<br>Recorded frequency, intensity and duration of physical activity carried out + No. steps taken that day and if they wore the pedometer as they were supposed to for the study | % No. diary entries over a month / 21 days                                                                                                                           |



| Author | Type      | Name                                            | How devised                                                                                               | Condition                      | Description                                                                                                                                                         | Score                                                                                                                                                  |
|--------|-----------|-------------------------------------------------|-----------------------------------------------------------------------------------------------------------|--------------------------------|---------------------------------------------------------------------------------------------------------------------------------------------------------------------|--------------------------------------------------------------------------------------------------------------------------------------------------------|
| [46]   | Log/diary | NR but referred to as a Step/ chord calendar    | NR                                                                                                        | Heart failure                  | Recorded No. exercises carried out, repetitions and Thera-chord color + RPE<br>Collected by nurse or exercise specialist                                            | 2 resistance exercise sessions had to be recorded on the calendar in addition to another exercise session recorded differently to be deemed 'adherent' |
| [19]   | Log/diary | NR but referred to as a daily home exercise log | NR                                                                                                        | Older people: Activity         | Days where participants exercised, an 'E' was marked on the calendar log.<br>If participant had a fall they marked an 'F' to detract from the variable of adherence | Individuals were rated adherent if exercise was conducted 3 times/week                                                                                 |
| [22]   | Log/diary | NR but referred to as an exercise diary         | NR                                                                                                        | Huntington's Disease           | The log recorded which exercises were carried out each week between 1 and 3 times.                                                                                  | NR                                                                                                                                                     |
| [47]   | Log/diary | NR but described as an exercise log             | NR                                                                                                        | Activity program               | Recorded type, frequency and duration of exercise, heart rate while exercising and an RPE for each exercise session                                                 | Monthly No. sessions completed / No. prescribed sessions                                                                                               |
| [48]   | Log/diary | NR but referred to as diaries                   | NR but reference to Bassett 2003 commenting self-report measures are a good technique to assess adherence | Stroke                         | Recorded frequency and duration of sessions. Participants were aware that sessions should be <90 minutes.                                                           | NR                                                                                                                                                     |
| [49]   | Log/diary | NR but referred to as a home exercise diary     | NR                                                                                                        | Distal radius fracture Surgery | Recorded No. exercise sessions + No. exercises conducted per session                                                                                                | % No. exercises * sessions conducted / prescribed                                                                                                      |
| [50]   | Log/diary | NR but referred to as a daily exercise diary    | NR                                                                                                        | Chronic low back pain          | Recorded frequency                                                                                                                                                  | % No. sessions conducted / prescribed                                                                                                                  |
| [51]   | Log/diary | NR but referred to as a daily log               | NR                                                                                                        | Veteran's illness              | Recorded frequency, intensity and duration of exercise.<br>Report how they measure intensity from the choice type + heart rate + METs or RPEs                       | NR                                                                                                                                                     |
| [52]   | Log/diary | NR but referred to as an activity log           | NR                                                                                                        | Heart failure                  | Recorded RPE, heart rate, exercises completed and duration of the session, as well as any symptoms that occurred                                                    | % No. exercises * sessions conducted / prescribed                                                                                                      |

| Author | Type      | Name                                              | How devised                                                                                                                                                                                                             | Condition                 | Description                                                                                                                                                                                                            | Score                                                                                |
|--------|-----------|---------------------------------------------------|-------------------------------------------------------------------------------------------------------------------------------------------------------------------------------------------------------------------------|---------------------------|------------------------------------------------------------------------------------------------------------------------------------------------------------------------------------------------------------------------|--------------------------------------------------------------------------------------|
| [53]   | Log/diary | NR but referred to as a daily diary               | Devised by authors and used in previous studies but not measuring adherence. Content validity was attempted by a panel of oncology nurses and nurse researchers and exercise physiologists. No target population input. | Breast Cancer             | Recorded fatigue, duration of walking, pulse rate before and after walking in addition to any side effects or symptoms of disease experienced                                                                          | NR                                                                                   |
| [54]   | Log/diary | NR but referred to as a personalized record sheet | Designed by the authors                                                                                                                                                                                                 | Injured athletes          | Content of sheet individualized by participant with the doctor and completed each week                                                                                                                                 | Weekly mean by inspection                                                            |
| [55]   | Log/diary | NR but referred to as exercise diaries            | NR                                                                                                                                                                                                                      | Chronic neck pain         | Recorded frequency, which exercises, repetitions and weights                                                                                                                                                           | Mean and standard deviation of the training frequency                                |
| [56]   | Log/diary | NR but referred to as a diary and log sheet       | Taken from pre-existing diary recording wet episodes in incontinence patients                                                                                                                                           | Osteoarthritis            | Recorded No. exercises / day                                                                                                                                                                                           | % No. exercises conducted / prescribed                                               |
| [57]   | Log/diary | NR but referred to as a daily exercise diary      | NR                                                                                                                                                                                                                      | Elderly at Podiatry/Falls | Recorded No. exercises / day                                                                                                                                                                                           | Adherence was deemed as the participant completed $\geq 50\%$ of prescribed exercise |
| [58]   | Log/diary | NR but referred to as exercise logs               | NR                                                                                                                                                                                                                      | Osteoarthritis            | Recorded frequency and duration of exercise + pain + exertion experienced                                                                                                                                              | % No. exercises conducted / prescribed                                               |
| [59]   | Log/diary | NR but referred to as a log book                  | NR                                                                                                                                                                                                                      | Myocardial Infarction     | Duration and frequency of exercises per week                                                                                                                                                                           | % No. exercises and duration conducted / prescribed                                  |
| [60]   | Log/diary | NR but referred to as diaries                     | NR                                                                                                                                                                                                                      | Weight loss               | Frequency of exercise providing it was $>2/\text{week}$ + a minimum of 30 minutes                                                                                                                                      | NR                                                                                   |
| [61]   | Log/diary | NR but referred to as exercise logs               | NR                                                                                                                                                                                                                      | Sedentary healthy women   | Recorded date, completion of warm up and cooldown, time spent walking and estimated No. miles walked. Participants were encouraged to note weather, terrain, route taken, and how the participant felt whilst walking. | NR                                                                                   |

| Author | Type      | Name                                        | How devised | Condition              | Description                                                                                                                                              | Score                                                                                                              |
|--------|-----------|---------------------------------------------|-------------|------------------------|----------------------------------------------------------------------------------------------------------------------------------------------------------|--------------------------------------------------------------------------------------------------------------------|
| [62]   | Log/diary | NR but referred to as a weekly exercise log | NR          | Bariatric surgery      | Frequency and duration of exercise sessions, type of exercise performed, Borg scale rating during exercise and data pertaining to pedometer use per week | Means and standard deviations were calculated                                                                      |
| [63]   | VAS       | NR but was a VAS                            | NR          | Physiotherapy patients | 14.5 cm line with 0, 25, 50, 75 and 100% marked as anchors                                                                                               | Perceived adherence in cm                                                                                          |
| [64]   | VAS       | NR but was a VAS                            | NR          | Physiotherapy patients | 10 cm line with the anchors at each end ('no exercise' to 'completing all exercises for the week')                                                       | Adherence was assessed depending on the number of VAS returned and the level of adherence they had indicated in cm |
| [65]   | Monitor   | Tally counter                               | NR          | Voice therapy          | A small device record each time the exercises were performed for at least a 2 minute duration.                                                           | NR                                                                                                                 |

NR, not reported; VAS, Visual Analogue Scale; No., number of; RPE, Rating of Perceived Exertion

According to the quality criteria proposed for measurement properties of health status questionnaires (Terwee et al. 2007), only The Heart Failure Compliance Questionnaire and Adherence to Exercise Scale for Older Patients (AESOP) achieved a positive rating (Evangelista et al. 2001, Hardage et al. 2007).

Most measures had no evidence that they had undergone any sort of psychometric evaluation although a small number of researchers had attempted to evaluate some measurement properties but used dubious methods or the property being assessed fell below suitable quality thresholds. In addition, some authors referenced that their measure had established psychometric properties but then modified the scale or used it with a completely different population without re-examining the properties in the revised scale.

No studies assessed agreement or responsiveness

**Table 4** shows a summary of the measurement methods identified by the SR by [7].

**Table 4.** Measurement methods identified in Frost et al. and evaluation of validity.

| Type                                            | Description                                                                                                                                                                                                                                                                                                                                      | Validity                                                                                                                                                                                                                                                                                                                                                                                                                                                                  | Reliability                                                                  | Acceptability                                                                                                                                                                                                                                                                                                                                                                                                                                                                                                                                                                                                |
|-------------------------------------------------|--------------------------------------------------------------------------------------------------------------------------------------------------------------------------------------------------------------------------------------------------------------------------------------------------------------------------------------------------|---------------------------------------------------------------------------------------------------------------------------------------------------------------------------------------------------------------------------------------------------------------------------------------------------------------------------------------------------------------------------------------------------------------------------------------------------------------------------|------------------------------------------------------------------------------|--------------------------------------------------------------------------------------------------------------------------------------------------------------------------------------------------------------------------------------------------------------------------------------------------------------------------------------------------------------------------------------------------------------------------------------------------------------------------------------------------------------------------------------------------------------------------------------------------------------|
| StepWatch Activity Monitor (SAM)                | Research-grade ankle-worn activity monitor. Described as a pedometer, accelerometer or activity monitor as the internal mechanisms have not been disclosed.                                                                                                                                                                                      | Small percentage error and mean bias and high percentage accuracy compared to direct observation for measuring step counts in healthy populations, individuals with COPD and individuals with MS in laboratory settings.<br>Fair predictive validity in persons with intermittent claudication for changes in Peak Walking Time.                                                                                                                                          | High quality studies were not found                                          | Highly acceptable across populations for 1-28 days' wear (most commonly worn for 1 week) including persons with MS, TKA, neurological conditions, sarcoma, lower limb prosthesis, knee OA and older, sedentary and obese adults.<br>In most studies >90% patients complied with SAM wear, but this was variable.<br>Acceptable for 7 days wear in persons with knee osteoarthritis and older, sedentary or obese adults                                                                                                                                                                                      |
| Problematic Experiences of Therapy Scale (PETS) | 12-item scale measuring general non-adherence – the degree to which socially acceptable reasons prevented patients adhering e.g. symptom severity/aggravation, efficacy doubts, practical challenges.                                                                                                                                            | Excellent structural validity in populations with chronic dizziness from vestibular conditions.                                                                                                                                                                                                                                                                                                                                                                           | Excellent internal consistency in populations with dizziness                 | High completion rates in a Meniere's disease rehabilitation study.<br>Requires testing in a wider variety of populations.                                                                                                                                                                                                                                                                                                                                                                                                                                                                                    |
| Adherence diaries (AD)                          | ADs were defined by their function of regular (usually daily) patient self-report of an activity. All AD types were aggregated (electronic method, telephone interview, questionnaire [patient and provider], diary + provider questionnaire, diary + patient questionnaire, diary + telephone interview, and diary + heart rate self-assessed). | Moderate-excellent criterion validity for measuring adherence to exercise frequency and duration compared to a heart rate monitor, pedometers and radiofrequency identification card system in sedentary women, older adults, cancer patients and pregnant women. Fair to no predictive validity for walking adherence and changes in fitness in sedentary women.<br>Good construct validity was found compared to the Physical Activity Questionnaire in cancer patients | High quality studies were not found                                          | Moderate to high (50-100% return rates) across a variety of patient populations recording adherence from 2 weeks to 12 months. Higher return rates were found in persons with TKA, systematic sclerosis, heart failure, coronary heart disease, diabetes, Crohn's, elbow pain and osteoarthritis. Mixed return rates were found in persons with COPD and back pain. Strategies that appeared to have a higher return rate included remuneration, weekly collection and weekly review. Monthly collection did not engender particularly high return rates and studies using reminders had mixed return rates. |
| Bassett & Prapavessis' Scale (B&P)              | Self-report scale measuring general adherence (rated 1-5) to 5 dimensions of home-based physiotherapy: exercises, ice, rest, strapping and elevation.                                                                                                                                                                                            | Poor predictive validity for adherence and functional outcomes in patients with ankle sprains.<br>Fair construct validity compared to intentions to adhere in patients with ankle sprains.                                                                                                                                                                                                                                                                                | Good internal consistency between scale items in patients with ankle sprains | High quality studies were not found                                                                                                                                                                                                                                                                                                                                                                                                                                                                                                                                                                          |

| Type                                               | Description                                                                                                                                                                                                                                              | Validity                                                                                                                                                                                                                  | Reliability                         | Acceptability                                                                                                                                                                                                                                                                                                   |
|----------------------------------------------------|----------------------------------------------------------------------------------------------------------------------------------------------------------------------------------------------------------------------------------------------------------|---------------------------------------------------------------------------------------------------------------------------------------------------------------------------------------------------------------------------|-------------------------------------|-----------------------------------------------------------------------------------------------------------------------------------------------------------------------------------------------------------------------------------------------------------------------------------------------------------------|
| Borg 6-20 rating of perceived exertion (RPE) scale | 15-grade scale of self-reported exertion commonly used in rehabilitation, exertion testing and training.                                                                                                                                                 | Fair criterion validity compared to a heart rate monitor in older adults in two activities.<br>Fair construct validity compared to other walk parameters (e.g. gait speed).                                               | High quality studies were not found | High quality studies were not found                                                                                                                                                                                                                                                                             |
| Yamax Digiwalker CW series pedometer               | It records and displays the number of steps taken. It has a two-week memory and a three-year battery life. All CW series contain the same internal mechanisms and so all were included.                                                                  | Limited criterion validity compared to a GT1M ActiGraph accelerometer in pregnant women (overcounted at high step rates and undercounted at low step rates).<br>Moderate to good 'active' and 'inactive' classifications. | High quality studies were not found | CW-701 had data for 58/61 pregnant women for four days' wear                                                                                                                                                                                                                                                    |
| Joint Protection Behaviour Assessment (JPBA)       | 20-task observational scale assessing performance accuracy of arthritis joint protection behaviours when making a hot drink and snack in a kitchen. Behavior is graded as correct, partially correct or incorrect and converted to a percentage score.   | High quality studies were not found                                                                                                                                                                                       | High quality studies were not found | 83/127 individuals with rheumatoid arthritis agreed to be recorded performing the JPBA                                                                                                                                                                                                                          |
| Polar A1 series Heart Rate Monitors                | A family of Polar heart rate monitors. The models from this family with the same T31 transmitter include the FS1, A1, FT1, FT4, FT60, FT7 and RCX5. All these models were included in this review, though the A1 and FS1 may no longer be in production. | High quality studies were not found                                                                                                                                                                                       | High quality studies were not found | The Polar FT60 was used in 76% of exercise session by healthy adults. Interviews showed that adults found the polar monitor motivational, fun and increased understanding of exercise. However, it was unsuitable for certain sports, could be forgotten and the guidance was not always applicable for people. |

[8] found 6 measurement instruments (See Table 5), but none passed their criteria to have psychometric properties assessed.

**Table 5.** Measurement methods identified in the SR by Levy et al.

| Type                                                                                        | Description                                                                                                                                                                                                                                                                                                                                                                                                                                                                                                                                                                                                                                                                                                                                                                                                                                                                           | Metric properties |
|---------------------------------------------------------------------------------------------|---------------------------------------------------------------------------------------------------------------------------------------------------------------------------------------------------------------------------------------------------------------------------------------------------------------------------------------------------------------------------------------------------------------------------------------------------------------------------------------------------------------------------------------------------------------------------------------------------------------------------------------------------------------------------------------------------------------------------------------------------------------------------------------------------------------------------------------------------------------------------------------|-------------------|
| Diary                                                                                       | The content of the diaries was not discussed however the diaries were completed by the people with the disease and they registered the type of physical activity, frequency, duration and the intensity/repetitions.                                                                                                                                                                                                                                                                                                                                                                                                                                                                                                                                                                                                                                                                  | NT                |
| Logbook                                                                                     | Logbooks or daily activity logs were used as adherence measurement the studies used a log to record the duration and the type of activity performed. Other parameters recorded in the logbooks included weekly step activity, intensity and number of sets and repetitions of exercise.                                                                                                                                                                                                                                                                                                                                                                                                                                                                                                                                                                                               | NT                |
| Record of practice                                                                          | Three studies ask participant to record a daily training record indicating exercise completion and any adverse events.                                                                                                                                                                                                                                                                                                                                                                                                                                                                                                                                                                                                                                                                                                                                                                | NT                |
| Journal (1 study)                                                                           | One study utilized a journal for recording adherence. Repetitions and a quality reflection were recorded.                                                                                                                                                                                                                                                                                                                                                                                                                                                                                                                                                                                                                                                                                                                                                                             | NT                |
| Survey (2 studies)                                                                          | One study developed and used survey to explore exercise beliefs and adherence but the author acknowledged that a limitation of the survey was a lack of information about the validity of it.<br>Another study used a phone survey but there are no details about the survey content.                                                                                                                                                                                                                                                                                                                                                                                                                                                                                                                                                                                                 | NT                |
| Questionnaire (4 studies)                                                                   | Three studies develop their own questionnaires to measure adherence [21, 66, 67].<br>Jurkiewicz et al. developed a 16-item questionnaire comprising questions about the type and amount of exercise performed, factors that motivated patients to participate and reasons why they missed their workout.<br>Touillet et al. described using a semi-structured activity questionnaire, which explored type of activity as well as duration and frequency. An additional study developed a questionnaire that examined consistency between prescribed treatment and exercises completed [67].<br>In a study exploring longitudinal patterns of adherence to exercises in people with stroke researchers utilized the Questionnaire of Exercise Adherence, a 14-item questionnaire consisting of three dimensions: adherence to exercise, effective supervision and advice seeking [68]. | NT                |
| The Physical Activity Scale for Individuals with Physical Disabilities [PASIPD] (4 studies) | The PASIPD is a 13-item self-report tool that assesses physical activity in three domains: recreation, household and occupational activities. However, this tool was not designed for measuring adherence.                                                                                                                                                                                                                                                                                                                                                                                                                                                                                                                                                                                                                                                                            | NT                |

NT, not tested or assessed.

## Synthesis

- Currently, there is no gold standard of exercise adherence measurement.
- Measures of adherence included in this review are limited by the quality of the evidence and by the low applicability across interventions.
- Measures of adherence to exercise can be categorized as:
  - Questionnaires / scales / surveys
  - Diaries / logbooks
  - Other type of assessment (different types of monitors).
- The majority of tools reported have not had a proper description of their psychometric properties, except for:
  - The Heart Failure Compliance Questionnaire and Adherence to Exercise Scale for Older Patients (AESOP) → positive rating for content validity.
  - The **Problematic Experiences of Therapy Scale** can validly and reliably assess general adherence across vestibular rehabilitation populations.
  - **Adherence diaries** which can approximate adherence to intervention frequency and duration, reported an acceptability that ranged from moderate to high
  - **StepWatch Activity Monitors** are likely to be valid and acceptable to assess adherence to walking interventions.

## References

1. Osho O, Owoeye O, Armijo-Olivo S. Adherence and Attrition in Fall Prevention Exercise Programs for Community-Dwelling Older Adults: A Systematic Review and Meta-Analysis. *J Aging Phys Act* 2018;26(2):304-326.
2. Picha KJ, Jochimsen KN, Heebner NR, et al. Measurements of self-efficacy in musculoskeletal rehabilitation: A systematic review. *Musculoskeletal Care* 2018;16(4):471-488.
3. Rawstorn JC, Gant N, Direito A, et al. Telehealth exercise-based cardiac rehabilitation: a systematic review and meta-analysis. *Heart* 2016;102(15):1183-1192.
4. Tierney S, Mamas M, Skelton D, et al. What can we learn from patients with heart failure about exercise adherence? A systematic review of qualitative papers. *Health Psychology* 2011;30(4):401.
5. Williams MT, Lewis LK, McKeough Z, et al. Reporting of exercise attendance rates for people with chronic obstructive pulmonary disease: a systematic review. *Respirology* 2014;19(1):30-37.
6. Bollen JC, Dean SG, Siegert RJ, et al. A systematic review of measures of self-reported adherence to unsupervised home-based rehabilitation exercise programmes, and their psychometric properties. *BMJ open* 2014;4(6):e005044.
7. Frost R, Levati S, McClurg D, et al. What adherence measures should be used in trials of home-based rehabilitation interventions? A systematic review of the validity, reliability, and acceptability of measures. *Archives of Physical Medicine and Rehabilitation* 2017;98(6):1241-1256. e1245.
8. Levy T, Laver K, Killington M, et al. A systematic review of measures of adherence to physical exercise recommendations in people with stroke. *Clin Rehabil* 2019;33(3):535-545.
9. Barnowski TL, Blessinger SC, Britton KJ, et al. The relationship of compliance and grip strength return post-carpal tunnel release surgery. *Work* 1998;10(2):181-191.
10. Bassett SF, Prapavessis H. A test of an adherence-enhancing adjunct to physiotherapy steeped in the protection motivation theory. *Physiother Theory Pract* 2011;27(5):360-372.
11. Bennell KL, Egerton T, Bills C, et al. Addition of telephone coaching to a physiotherapist-delivered physical activity program in people with knee osteoarthritis: a randomised controlled trial protocol. *BMC Musculoskelet Disord* 2012;13(1):246.
12. Borello-France D, Burgio KL, Goode PS, et al. Adherence to behavioral interventions for urge incontinence when combined with drug therapy: adherence rates, barriers, and predictors. *Physical therapy* 2010;90(10):1493-1505.
13. Chen S-Y, Tzeng Y-L. Path analysis for adherence to pelvic floor muscle exercise among women with urinary incontinence. *Journal of Nursing Research* 2009;17(2):83-92.
14. Courneya KS, Friedenreich CM, Quinney HA, et al. Predictors of adherence and contamination in a randomized trial of exercise in colorectal cancer survivors. *Psychooncology* 2004;13(12):857-866.
15. Dobkin PL, Ionescu-Iltu R, Abrahamowicz M, et al. Predictors of adherence to an integrated multimodal program for fibromyalgia. *J Rheumatol* 2008;35(11):2255-2264.
16. Evangelista LS, Berg J, Dracup K. Relationship between psychosocial variables and compliance in patients with heart failure. *Heart & Lung* 2001;30(4):294-301.
17. Forkan R, Pumper B, Smyth N, et al. Exercise adherence following physical therapy intervention in older adults with impaired balance. *Phys Ther* 2006;86(3):401-410.
18. Gallo ML, Staskin DR. Cues to action: pelvic floor muscle exercise compliance in women with stress urinary incontinence. *NeuroUrol Urodyn* 1997;16(3):167-177.



19. Hardage J, Peel C, Morris D, et al. Adherence to Exercise Scale for Older Patients (AESOP): a measure for predicting exercise adherence in older adults after discharge from home health physical therapy. *J Geriatr Phys Ther* 2007;30(2):69-78.
20. Howard DB, Gosling CM. A short questionnaire to identify patient characteristics indicating improved compliance to exercise rehabilitation programs: A pilot investigation. *International journal of osteopathic medicine* 2008;11(1):7-15.
21. Jurkiewicz MT, Marzolini S, Oh P. Adherence to a home-based exercise program for individuals after stroke. *Top Stroke Rehabil* 2011;18(3):277-284.
22. Khalil H, Quinn L, van Deursen R, et al. Adherence to use of a home-based exercise DVD in people with Huntington disease: participants' perspectives. *Physical therapy* 2012;92(1):69-82.
23. Kim CJ, Kang DH. Utility of a Web-based intervention for individuals with type 2 diabetes: the impact on physical activity levels and glycemic control. *Comput Inform Nurs* 2006;24(6):337-345.
24. Levy AR, Polman RC, Borkoles E. Examining the relationship between perceived autonomy support and age in the context of rehabilitation adherence in sport. *Rehabilitation Psychology* 2008;53(2):224.
25. Lysack C, Dama M, Neufeld S, et al. A compliance and satisfaction with home exercise: a comparison of computer-assisted video instruction and routine rehabilitation practice. *J Allied Health* 2005;34(2):76-82.
26. Mailloux J, Finno M, Rainville J. Long-term exercise adherence in the elderly with chronic low back pain. *Am J Phys Med Rehabil* 2006;85(2):120-126.
27. Marzolini S, Mertens DJ, Oh PI, et al. Self-reported compliance to home-based resistance training in cardiac patients. *Eur J Cardiovasc Prev Rehabil* 2010;17(1):35-41, quiz 42-39.
28. McCarthy CJ, Mills PM, Pullen R, et al. Supplementation of a home-based exercise programme with a class-based programme for people with osteoarthritis of the knees: a randomised controlled trial and health economic analysis. *Health Technol Assess* 2004;8(46):iii-iv, 1-61.
29. Medina-Mirapeix F, Escolar-Reina P, Gascon-Canovas JJ, et al. Predictive factors of adherence to frequency and duration components in home exercise programs for neck and low back pain: an observational study. *BMC Musculoskelet Disord* 2009;10(1):155.
30. Milne M, Hall C, Forwell L. Self-efficacy, imagery use, and adherence to rehabilitation by injured athletes. *Journal of Sport Rehabilitation* 2005;14(2):150-167.
31. Rackwitz B, Limm H, Wessels T, et al. Practicability of segmental stabilizing exercises in the context of a group program for the secondary prevention of low back pain. An explorative pilot study. *Eura Medicophys* 2007;43(3):359-367.
32. Radtke KL. Exercise compliance in cardiac rehabilitation. *Rehabil Nurs* 1989;14(4):182-186, 195.
33. Sluijs EM, Kok GJ, van der Zee J. Correlates of exercise compliance in physical therapy. *Phys Ther* 1993;73(11):771-782; discussion 783-776.
34. Terpstra S, de Witte L, Diederiks J. Compliance of patients with an exercise program for rheumatoid arthritis. *Physiother Can* 1992;44:37-42.
35. White D, Stiller K, Haensel N. Adherence of adult cystic fibrosis patients with airway clearance and exercise regimens. *J Cyst Fibros* 2007;6(3):163-170.
36. Alewijnse D, Mesters I, Metsemakers J, et al. Predictors of long-term adherence to pelvic floor muscle exercise therapy among women with urinary incontinence. *Health education research* 2003;18(5):511-524.
37. Alexandre NMC, Nordin M, Hiebert R, et al. Predictors of compliance with short-term treatment among patients with back pain. *Revista panamericana de salud pública* 2002;12:86-95.
38. Borello-France DF, Downey PA, Zyczynski HM, et al. Continence and quality-of-life outcomes 6 months following an intensive pelvic-floor muscle exercise program for female stress urinary incontinence: a randomized trial comparing low- and high-frequency maintenance exercise. *Phys Ther* 2008;88(12):1545-1553.
39. Brovold T, Skelton DA, Bergland A. The efficacy of counseling and progressive resistance home-exercises on adherence, health-related quality of life and function after discharge from a geriatric day-hospital. *Arch Gerontol Geriatr* 2012;55(2):453-459.
40. Chen C-Y, Neufeld PS, Feely CA, et al. Factors influencing compliance with home exercise programs among patients with upper-extremity impairment. *American Journal of Occupational Therapy* 1999;53(2):171-180.
41. Cockram J, Cecins N, Jenkins S. Maintaining exercise capacity and quality of life following pulmonary rehabilitation. *Respirology* 2006;11(1):98-104.
42. Donesky-Cuenca D, Janson S, Neuhaus J, et al. Adherence to a home-walking prescription in patients with chronic obstructive pulmonary disease. *Heart Lung* 2007;36(5):348-363.
43. Duncan KA, Pozehl B. Staying on course: the effects of an adherence facilitation intervention on home exercise participation. *Prog Cardiovasc Nurs* 2002;17(2):59-65, 71.
44. Ettinger WH, Jr., Burns R, Messier SP, et al. A randomized trial comparing aerobic exercise and resistance exercise with a health education program in older adults with knee osteoarthritis. The Fitness Arthritis and Seniors Trial (FAST). *JAMA* 1997;277(1):25-31.
45. Fukuoka Y, Kamitani E, Dracup K, et al. New insights into compliance with a mobile phone diary and pedometer use in sedentary women. *Journal of Physical Activity and Health* 2011;8(3):398-403.

46. Gary RA, Cress ME, Higgins MK, et al. Combined aerobic and resistance exercise program improves task performance in patients with heart failure. *Arch Phys Med Rehabil* 2011;92(9):1371-1381.
47. King AC, Haskell WL, Taylor CB, et al. Group-vs home-based exercise training in healthy older men and women: a community-based clinical trial. *Jama* 1991;266(11):1535-1542.
48. BE MK, Michael Sampson MAppSc D, Jessica Satherley BSc B. Home-based stroke rehabilitation using computer gaming. *New Zealand Journal of Physiotherapy* 2012;40(3):128.
49. Lyngcoln A, Taylor N, Pizzari T, et al. The relationship between adherence to hand therapy and short-term outcome after distal radius fracture. *Journal of Hand Therapy* 2005;18(1):2-8.
50. Mannion AF, Helbling D, Pulkovski N, et al. Spinal segmental stabilisation exercises for chronic low back pain: programme adherence and its influence on clinical outcome. *Eur Spine J* 2009;18(12):1881-1891.
51. Mori DL, Sogg S, Guarino P, et al. Predictors of exercise compliance in individuals with Gulf War veterans illnesses: Department of Veterans Affairs Cooperative Study 470. *Mil Med* 2006;171(9):917-923.
52. Oka RK, De Marco T, Haskell WL, et al. Impact of a home-based walking and resistance training program on quality of life in patients with heart failure. *Am J Cardiol* 2000;85(3):365-369.
53. Pickett M, Mock V, Ropka ME, et al. Adherence to moderate-intensity exercise during breast cancer therapy. *Cancer Pract* 2002;10(6):284-292.
54. sÁEZ DE HEREDIA RA, MUÑOZ AR, ARTAZA JL. The effect of psychological response on recovery of sport injury. *Research in Sports Medicine* 2004;12(1):15-31.
55. Salo P, Ylonen-Kayra N, Hakkinen A, et al. Effects of long-term home-based exercise on health-related quality of life in patients with chronic neck pain: a randomized study with a 1-year follow-up. *Disabil Rehabil* 2012;34(23):1971-1977.
56. Schoo AM, Morris ME, Bui QM. Predictors of home exercise adherence in older people with osteoarthritis. *Physiotherapy Canada* 2005;57(3):179-187.
57. Spink MJ, Fotoohabadi MR, Wee E, et al. Predictors of adherence to a multifaceted podiatry intervention for the prevention of falls in older people. *BMC Geriatr* 2011;11(1):51.
58. Steinhilber B, Haupt G, Miller R, et al. Feasibility and efficacy of an 8-week progressive home-based strengthening exercise program in patients with osteoarthritis of the hip and/or total hip joint replacement: a preliminary trial. *Clinical rheumatology* 2012;31(3):511-519.
59. Tooth L, McKenna K, Colquhoun D. Prediction of compliance with a post-myocardial infarction home-based walking programme. *Australian Occupational Therapy Journal* 1993;40(1):17-22.
60. Wang C-J, Fetzer SJ, Yang Y-C, et al. The efficacy of using self-monitoring diaries in a weight loss program for chronically ill obese adults in a rural area. *Journal of Nursing Research* 2012;20(3):181-188.
61. Wilbur J, Chandler P, Miller AM, et al. Measuring adherence to a women's walking program. *Western Journal of Nursing Research* 2001;23(1):8-32.
62. Zagarins SE, Allen NA, Skinner SS, et al. Improved exercise behaviors associated with a comprehensive structured exercise program following bariatric surgery. *Bariatric Nursing and Surgical Patient Care* 2011;6(2):85-90.
63. Michener SKW, Olson AL, Humphrey BA, et al. Relationship among grip strength, functional outcomes, and work performance following hand trauma. *Work* 2001;16(3):209-217.
64. Roddey TS, Olson SL, Gartsman GM, et al. A randomized controlled trial comparing 2 instructional approaches to home exercise instruction following arthroscopic full-thickness rotator cuff repair surgery. *J Orthop Sports Phys Ther* 2002;32(11):548-559.
65. van Leer E, Connor NP. Use of portable digital media players increases patient motivation and practice in voice therapy. *Journal of Voice* 2012;26(4):447-453.
66. Touillet A, Guesdon H, Bossier G, et al. Assessment of compliance with prescribed activity by hemiplegic stroke patients after an exercise programme and physical activity education. *Ann Phys Rehabil Med* 2010;53(4):250-257, 257-265.
67. Mahmood A, Solomon J, Manikandan N. Adherence to home-based exercises in community dwelling stroke survivors a pilot cross-sectional study. *Neurorehabil Neural Repair* 2018;32(4-5):389-390.
68. Yao M, Chen J, Jing J, et al. Defining the rehabilitation adherence curve and adherence phases of stroke patients: an observational study. *Patient Prefer Adherence* 2017;11:1435-1441.
