# Supplementary material for: Prevention, screening, assessing and managing of non-adherent behaviour in people with rheumatic and musculoskeletal diseases: systematic reviews informing the 2020 EULAR points to consider
Source: PubMed Central journal article supplement — RMD Open. 2020 Nov 9;6(3):e001432. doi: 10.1136/rmdopen-2020-001432 (PMC7856118; doi:10.1136/rmdopen-2020-001432), 2020-11-09
Supplement: rmdopen-2020-001432supp008.pdf [file rmdopen-2020-001432supp008.pdf]

## Supplement\_H\_PICO\_6\_what professionals manage adherence

### PICO 6: Which health care providers are responsible for managing non-adherence?

Assuming non-adherence is important to treatment outcome, the question remains who should manage non-adherence in people with RMDs?

All interventions included in the selected systematic reviews were reviewed. Only physicians and health professionals in rheumatology (HPR) delivering interventions that showed a positive effect on adherence were finally selected.

#### Summary

The evidence is based on a total of 4 reviews, including fifteen RCT studies where physicians and/or health professionals in rheumatology (HPR) delivered interventions improving adherence (9 studies[1-9] for medication adherence; 7[10-16] for non-pharmacological/exercise adherence). The details and descriptions of interventions are listed in table 1.

#### Medication adherence

Patients in the included studies were diagnosed with: rheumatoid arthritis (RA)[2-6], psoriasis[1], systemic lupus erythematosus (SLE)[7, 9], juvenile rheumatoid arthritis (JRA)[8].

In the studies, the following professions delivered intervention that were shown to improve medication adherence:

- 1) Rheumatologists/physicians[3, 4]
- 2) Nurses[2, 8]
- 3) Pharmacists[6, 7]
- 4) Therapists[5]

Nieuwlaat, Wilczynski [17] conclude that nurses, pharmacists and therapists are more and more becoming part of delivering interventions that may increase adherent behaviour in people with RMDs. Hence, in a future perspective, it would be relevant to further explore and expand the role of HPRs in the management of RMDs, including, counselling patients for enhancing medication adherence[17].

#### Exercise adherence

Included patients were diagnosed with, rheumatoid arthritis (RA)[15, 16], osteoarthritis[10-12, 14], and low back pain[13], and the interventions were delivered by (i) rheumatologists/physicians[10, 14, 15], (ii) physiotherapists[12, 13] (iii) exercise physiologist[11], and (iv) patient educators[16].

**Table 1.** Professionals delivered effective interventions to enhance adherent behaviour in people with RMDs.

| Study                                                    | Review                 | Diagnoses           | Interventions delivered by                         |
|----------------------------------------------------------|------------------------|---------------------|----------------------------------------------------|
| Studies with significant effects on medication adherence |                        |                     |                                                    |
| Balato, Megna [1]                                        | Depont, Berenbaum [18] | Psoriasis           | Text Messages, no professions mentioned explicitly |
| Hill, Bird [2]                                           | Depont, Berenbaum [18] | RA                  | rheumatology nurse practitioner                    |
| El Miedany, El Gaafary [3]                               | Depont, Berenbaum [18] | Early RA            | rheumatologist                                     |
| El Miedany, El Gaafary [4]                               | Depont, Berenbaum [18] | RA                  | rheumatologist                                     |
| Clifford, Barber [6]                                     | Galo, Mehat [19]       | RA                  | community pharmacist                               |
| Ganachari and Almas [7]                                  | Galo, Mehat [19]       | SLE                 | pharmacist                                         |
| Rapoff, Belmont [8]                                      | Galo, Mehat [19]       | JIA                 | nurse                                              |
| Evers, Kraaiaam [5]                                      | Depont, Berenbaum [18] | Early RA            | therapists                                         |
| Ting, Kudalkar [9]                                       | Galo, Mehat [19]       | childhood-onset SLE | Text Messages, no professions mentioned explicitly |

| Study                                                  | Review                 | Diagnoses     | Interventions delivered by |
|--------------------------------------------------------|------------------------|---------------|----------------------------|
| Studies with significant effects on exercise adherence |                        |               |                            |
| Ravaud, Flipo [10]                                     | Ezzat, MacPherson [20] | OA/knee,      | rheumatologists            |
| Vong, Cheing [13]                                      | Nicolson, Bennell [21] | Low Back Pain | physical therapists        |
| Halbert, Crotty [11]                                   | Ezzat, MacPherson [20] | OA            | exercise physiologist      |
| Brus, Van De Laar [15]                                 | Depont, Berenbaum [18] | RA            | rheumatologist             |
| Pisters, Veenhof [12]                                  | Ezzat, MacPherson [20] | OA/hip, knee  | physiotherapists           |
| Tüzün, Cifcili [14]                                    | Nicolson, Bennell [21] | Knee OA       | physician                  |
| McEvoy Devellis, Blalock [16]                          | Galo, Mehat [19]       | RA            | patient educator           |

## REFERENCES

- Balato N, Megna M, Di Costanzo L, et al. Educational and motivational support service: a pilot study for mobile-phone-based interventions in patients with psoriasis. *British journal of dermatology* 2013;168(1):201-205.
- Hill J, Bird H, Johnson S. Effect of patient education on adherence to drug treatment for rheumatoid arthritis: a randomised controlled trial. *Annals of the rheumatic diseases* 2001;60(9):869-875.
- El Miedany Y, El Gaafary M, Palmer D. Assessment of the utility of visual feedback in the treatment of early rheumatoid arthritis patients: a pilot study. *Rheumatology international* 2012;32(10):3061-3068.
- El Miedany Y, El Gaafary M, El Arousy N, et al. Arthritis education: the integration of patient-reported outcome measures and patient self-management. *Clin Exp Rheumatol* 2012;30(6):899-904.
- Evers AW, Kraaimaat FW, van Riel PL, et al. Tailored cognitive-behavioral therapy in early rheumatoid arthritis for patients at risk: a randomized controlled trial. *Pain* 2002;100(1-2):141-153.
- Clifford S, Barber N, Elliott R, et al. Patient-centred advice is effective in improving adherence to medicines. *Pharmacy World and Science* 2006;28(3):165.
- Ganachari M, Almas SA. Evaluation of clinical pharmacist mediated education and counselling of systemic lupus erythematosus patients in tertiary care hospital. *Indian Journal of Rheumatology* 2012;7(1):7-12.
- Rapoff MA, Belmont J, Lindsley C, et al. Prevention of nonadherence to nonsteroidal anti-inflammatory medications for newly diagnosed patients with juvenile rheumatoid arthritis. *Health Psychology* 2002;21(6):620.
- Ting TV, Kudalkar D, Nelson S, et al. Usefulness of cellular text messaging for improving adherence among adolescents and young adults with systemic lupus erythematosus. *The Journal of rheumatology* 2012;39(1):174-179.
- Ravaud P, Flipo B, Boutron I, et al. ARTIST (osteoarthritis intervention standardized) study of standardised consultation versus usual care for patients with osteoarthritis of the knee in primary care in France: pragmatic randomised controlled trial. *Bmj* 2009;338:b421.
- Halbert J, Crotty M, Weller D, et al. Primary care-based physical activity programs: effectiveness in sedentary older patients with osteoarthritis symptoms. *Arthritis Care & Research: Official Journal of the American College of Rheumatology* 2001;45(3):228-234.
- Pisters MF, Veenhof C, de Bakker DH, et al. Behavioural graded activity results in better exercise adherence and more physical activity than usual care in people with osteoarthritis: a cluster-randomised trial. *Journal of physiotherapy* 2010;56(1):41-47.
- Vong SK, Cheing GL, Chan F, et al. Motivational enhancement therapy in addition to physical therapy improves motivational factors and treatment outcomes in people with low back pain: a randomized controlled trial. *Archives of physical medicine and rehabilitation* 2011;92(2):176-183.
- Tüzün S, Cifcili S, Akman M, et al. How can we improve adherence to exercise programs in patients with osteoarthritis?: A randomized controlled trial. *Turkish Journal of Geriatrics* 2012;15(3).
- Brus HL, Van De Laar MA, Taal E, et al. Effects of patient education on compliance with basic treatment regimens and health in recent onset active rheumatoid arthritis. *Annals of the rheumatic diseases* 1998;57(3):146-151.
- McEvoy Devellis B, Blalock SJ, Hahn PM, et al. Evaluation of a problem-solving intervention for patients with arthritis. *Patient Education and Counseling* 1988;11(1):29-42.
- Nieuwlaat R, Wilczynski N, Navarro T, et al. Interventions for enhancing medication adherence. *Cochrane database of systematic reviews* 2014;(11).
- Depont F, Berenbaum F, Filippi J, et al. Interventions to improve adherence in patients with immune-mediated inflammatory disorders: a systematic review. *PLoS One* 2015;10(12):e0145076.
- Galo JS, Mehat P, Rai SK, et al. What are the effects of medication adherence interventions in rheumatic diseases: a systematic review. *Annals of the rheumatic diseases* 2016;75(4):667-673.
- Ezzat AM, MacPherson K, Leese J, et al. The effects of interventions to increase exercise adherence in people with arthritis: a systematic review. *Musculoskeletal Care* 2015;13(1):1.
- Nicolson PJA, Bennell KL, Dobson FL, et al. Interventions to increase adherence to therapeutic exercise in older adults with low back pain and/or hip/knee osteoarthritis: a systematic review and meta-analysis. *Br J Sports Med* 2017;51(10):791-799.
